# Supplementary material for: An E-factor minimized protocol for the preparation of methyl β-hydroxy esters
Source: Royal Society of Chemistry journal article supplement (doi:10.1039/c004461j), 2010-01-01

## Electronic Supplementary Information

### An E-factor minimized protocol for the preparation of methyl $\beta$ -hydroxy esters

Francesco Fringuelli, Daniela Lanari, Ferdinando Pizzo and Luigi Vaccaro\*

Laboratory of Green Synthetic Organic Chemistry, Dipartimento di Chimica,  
CEMIN - Università di Perugia Via Elce di Sotto, 8 I-06123, Perugia, Italia

Fax: (+39) 075 5855560

E-mail: [luigi@unipg.it](mailto:luigi@unipg.it);

#### CONTENTS

|              |                                                                                                                                                                                                    |
|--------------|----------------------------------------------------------------------------------------------------------------------------------------------------------------------------------------------------|
| page S2      | Experimental Section                                                                                                                                                                               |
| page S3-S4   | Calculation of E-factor                                                                                                                                                                            |
| page S5-S18  | Experimental details for batch procedures and full characterization data ( $^1\text{H}$ NMR, $^{13}\text{C}$ NMR, IR, GC-EIMS, mp, and Elemental analysis) for compounds <b>3a-l</b> and <b>6h</b> |
| page S20-S45 | Copies of the $^1\text{H}$ and $^{13}\text{C}$ NMR for compounds <b>3a-l</b> and <b>6h</b> .                                                                                                       |

## Experimental Section

All chemicals were purchased and used without any further purification. All  $^1\text{H}$  NMR and  $^{13}\text{C}$  NMR spectra were recorded at 400 MHz, 100.6 MHz respectively, using a convenient deuterated solvent (reported in the characterization charts) and the residual peak as internal standard, or TMS in the case of  $\text{CDCl}_3$ . IR spectra were recorded with FT-IR instrument, using  $\text{CHCl}_3$  as solvent. Column chromatographies were performed by using silica gel 230-400 mesh and eluting as reported in the following characterization charts. Amberlite IRA900F (Amb-F) was purchased from Aldrich as "Fluoride on polymer support".

Compounds **3b**<sup>1</sup>, **3g**<sup>2</sup>, **3h**<sup>1</sup>, **3i**<sup>1</sup>, **3k**<sup>3</sup>, and **3l**<sup>4</sup> are known compounds, products **3a**, **3c**, **3d**, **3e**, **3f**, **3g**, **3j** and **6h** are new compounds.

Characterization data and copies of the  $^1\text{H}$  and  $^{13}\text{C}$  NMR spectra for compounds **3a-l** and **6h** are reported below.

## References

- (1) Fujisawa, H.; Nakagawa, T.; Mukaiyama, T. *Adv. Synth. Catal.* **2004**, *346*, 1241.
- (2) Takeuchi, M.; Akiyama, M.; Kobayashi, S. *J. Am. Chem. Soc.* **2005**, *127*, 13096.
- (3) Benaglia, M.; Cinquini, M.; Cozzi, F.; Celentano, G. *Org. Biomol. Chem.* **2004**, *2*, 3401.
- (4) Loh, T.-P.; Feng, L.-C.; Wei, L.-L. *Tetrahedron*, **2000**, *56*, 7309.

**E-factor calculation (Waste produced (g)/ Product (g)), for the preparation of  $\beta$ -hydroxy ester 3b by the Mukaiyama aldol reaction of 1 mmol of benzaldehyde (1b) with methyl trimethylsilyl dimethylketene acetal (2), and consequent desilylation step.  
Not including the catalyst, silica-gel column chromatography, brine and drying agents.**

**E-factor = waste (g)/product (g)**

Calculation of E-factor has been performed understanding that not in all the cases reported in the literatures, Authors have been paid attention to the waste minimization in the setting of their protocols.

When the Authors have not reported the amount of solvent used in the work-up procedure, we have accounted for the same amount we used (2 x 2 mL of Et<sub>2</sub>O)

- J. J. Song, Z. Tan, J. T. Reeves, N. K. Yee, C. H. Senanayake, *Org. Lett.* **2007**, 9, 1013-1016.

**E-factor** = [0.106 g (benzaldehyde) + 4.45 g (THF) + 0.220 g (methyl trimethylsilyl dimethylketene acetal) + 2.36 g (aqueous HCl) + 44 g (CH<sub>2</sub>Cl<sub>2</sub>) – 0.158 g (product x yield)] / 0.158 g = **322.65**  
Not accounting for column chromatography

- T. Mukaiyama, H. Fujisawa, T. Nakagawa, *Helv. Chim. Acta* **2002**, 85, 4518-4531.

**E-factor** = [1.18 g (DMF) + 0.255 g (methyl trimethylsilyl dimethylketene acetal) + 0.59 g (DMF) + 0.106 g (benzaldehyde) + 0.708 g (DMF) + 2.8 g (Et<sub>2</sub>O extraction 2 x 2 mL) + 1.28 g (aqueous HCl) + 3.33 g (THF) + 2.8 g (Et<sub>2</sub>O extraction 2 x 2 mL) – 0.200 g (product x yield)] / 0.200 g = **64.24**  
Not accounting for column chromatography

- Z. -L. Schen, S. -J. Ji, T. -P. Loh, *Tetrahedron Lett.* **2005**, 46, 507-508.

**E-factor** = [0.106 g (benzaldehyde) + 0.364 g (methyl trimethylsilyl dimethylketene acetal) + 1.78 g (THF) + 2.72 g (aqueous HCl) + 21.18 g (Et<sub>2</sub>O extraction 3 x 10 mL) – 0.160 g (product x yield)] / 0.160 = **162.44**  
Not accounting for column chromatography

- S. -L. Chen, S. -J. Ji, T. -P. Loh, *Tetrahedron Lett.* **2004**, 45, 375-377.

**E-factor** = [0.106 g (benzaldehyde) + 0.200 g + 0.200 g (methyl trimethylsilyl dimethylketene acetal) + 0.552 g ([omim]Cl)\* + 2.72 g (aqueous HCl) + 2.8 g (Et<sub>2</sub>O extraction 2 x 2 mL) – 0.150 g (product x yield)] / 0.150 = **42.85**  
Not accounting for column chromatography

\*Density value 1.10395 taken from Romani et al *Fluid Phase Equilibria* **2007**, 252, 96–102.

- A. Heydaria, S. Khaksara, M. Sheykhana, M. Tajbakhshb *J. Mol. Catal. A*: **2008**, 287, 5-8.

**E-factor** = [0.106 g (benzaldehyde) + 1.57 g (MeCN) + 0.182 g (methyl trimethylsilyl dimethylketene acetal) + 3.31 g + 3.31 g (CH<sub>2</sub>Cl<sub>2</sub>) – 0.177 g (product x yield)] / 0.177 g = **46.91**  
Not accounting for column chromatography

- Our batch conditions:

**E-factor** = [0.106 g (benzaldehyde) + 0.273 g (methyl trimethylsilyl dimethylketene acetal) + 1.78 g (THF) + 2.8 g (Et<sub>2</sub>O extraction 2 x 2 mL) – 0.166 g (product x yield)] / 0.166 g = **28.87**

E-factor for all the substrates ranges from 19.6 - 28.9 see below for details in each case.

- **Our cyclic continuous flow conditions:**

**E-factor** = [0.106 g (benzaldehyde) + 0.223 g (methyl trimethylsilyl dimethylketene acetal) + 0.178 g (THF) – 0.177 g (product x yield)] / 0.177 g = **1.86**

E-factor for the three substrates ranges from 1.41 - 2.09

Beside the solvent used for the work-up procedures, it can certainly be concluded that in our case the most significant contribution to the E-factor minimization is due to the elimination of aqueous HCl waste, thanks to the novel de-silylation process promoted by Dowex 50Wx8 H.

The dramatic reduction of E-factor in the case of our cyclic continuous flow conditions it is certainly the proof that the combination of flow conditions, solvent-free conditions and solid recoverable catalysts, represents an efficient approach form minimizing the environmental cost of organic synthesis

In addition, in terms of labor time an automated process is clearly more convenient than a step-by-step process.

| Chem. Name                                                                                                                                                                                                                                                                                                                                                                                                                                                                                                                                                                                                                                                                                                                                                                                                                                                                                                                                                                                                                                                                                                                                                                                                                                          | <b>Methyl 3-(2',4'-dimethoxyphenyl)-3-hydroxy-2,2-dimethylpropanoate (3a)</b> |              |              |                   |
|-----------------------------------------------------------------------------------------------------------------------------------------------------------------------------------------------------------------------------------------------------------------------------------------------------------------------------------------------------------------------------------------------------------------------------------------------------------------------------------------------------------------------------------------------------------------------------------------------------------------------------------------------------------------------------------------------------------------------------------------------------------------------------------------------------------------------------------------------------------------------------------------------------------------------------------------------------------------------------------------------------------------------------------------------------------------------------------------------------------------------------------------------------------------------------------------------------------------------------------------------------|-------------------------------------------------------------------------------|--------------|--------------|-------------------|
| Lit. Ref.                                                                                                                                                                                                                                                                                                                                                                                                                                                                                                                                                                                                                                                                                                                                                                                                                                                                                                                                                                                                                                                                                                                                                                                                                                           | ----                                                                          |              |              |                   |
| <p style="text-align: center;"> <math>\text{1a} + \text{2} \xrightarrow[\text{30 } ^\circ\text{C, 5 h}]{\text{1. Amb-F (5 mol\%), SolIFC, 60 } ^\circ\text{C, 3 h}}</math> <math>\text{3a}</math><br/> Mol. Wt.: 268 </p>                                                                                                                                                                                                                                                                                                                                                                                                                                                                                                                                                                                                                                                                                                                                                                                                                                                                                                                                                                                                                           |                                                                               |              |              |                   |
| <b>METHOD:</b><br>In a screw capped vial equipped with a magnetic stirrer 2,4-dimethoxybenzaldehyde ( <b>1a</b> ) (0.166 g, 1.0 mmol), methyl trimethylsilyl dimethylketene acetal ( <b>2</b> ) (0.319 mL, 1.5 mmol) and Amb-F (0.020 g, 0.05 mmol, 2.5 mmol/g) were consecutively added and the resulting mixture was left under vigorous stirring at 60 °C. After 3 hours THF (2 mL) was added and the catalyst was filtered off. 20 mol% of DOWEX 50Wx8 H wet (25 mg) was added and the mixture was stirred at 30 °C for 5 h. Brine (1 mL) was then added, the solid catalyst filtered off and the organic phase was extracted with Et <sub>2</sub> O (2 x 2 mL). Organic layer was dried over sodium sulfate/potassium carbonate (2:1 mixture). Both methyl 2-methylpropionate, coming from the hydrolysis of the excess of <b>2</b> , and solvent were removed under high vacuum at 50 °C to give pure product methyl 3-(2',4'-dimethoxyphenyl)-3-hydroxy-2,2-dimethylpropanoate ( <b>3a</b> ) as a colorless oil (91% yield, 0.244 g).<br>E-factor = 19.6<br>[0.166 g (aldehyde) + 0.273g (methyl trimethylsilyl dimethylketene acetal) + 1.78 g (THF) + 2.8 g (Et <sub>2</sub> O extraction 2 x 2 mL) – 0.244 g (product x yield)] / 0.244 g |                                                                               |              |              |                   |
| <b>Mol Formula</b>                                                                                                                                                                                                                                                                                                                                                                                                                                                                                                                                                                                                                                                                                                                                                                                                                                                                                                                                                                                                                                                                                                                                                                                                                                  | $\text{C}_{14}\text{H}_{20}\text{O}_5$                                        | <b>m.p.</b>  | Oil          |                   |
| <b>FT-IR (CHCl<sub>3</sub>, cm<sup>-1</sup>):</b> 3532, 3011, 1713.                                                                                                                                                                                                                                                                                                                                                                                                                                                                                                                                                                                                                                                                                                                                                                                                                                                                                                                                                                                                                                                                                                                                                                                 |                                                                               |              |              |                   |
| <b>Elemental Analysis:</b> Calcd. C, 62.67; H, 7.51; found C, 62.53; H, 7.68.                                                                                                                                                                                                                                                                                                                                                                                                                                                                                                                                                                                                                                                                                                                                                                                                                                                                                                                                                                                                                                                                                                                                                                       |                                                                               |              |              |                   |
| <b><sup>1</sup>H NMR</b><br><b>400 MHz</b><br><b>CDCl<sub>3</sub></b>                                                                                                                                                                                                                                                                                                                                                                                                                                                                                                                                                                                                                                                                                                                                                                                                                                                                                                                                                                                                                                                                                                                                                                               | <b>δ value</b>                                                                | <b>No. H</b> | <b>Mult.</b> | <b>j value/Hz</b> |
|                                                                                                                                                                                                                                                                                                                                                                                                                                                                                                                                                                                                                                                                                                                                                                                                                                                                                                                                                                                                                                                                                                                                                                                                                                                     | 1.10                                                                          | 3            | s            |                   |
|                                                                                                                                                                                                                                                                                                                                                                                                                                                                                                                                                                                                                                                                                                                                                                                                                                                                                                                                                                                                                                                                                                                                                                                                                                                     | 1.14                                                                          | 3            | s            |                   |
|                                                                                                                                                                                                                                                                                                                                                                                                                                                                                                                                                                                                                                                                                                                                                                                                                                                                                                                                                                                                                                                                                                                                                                                                                                                     | 3.42                                                                          | 1            | d            | 6.3               |
|                                                                                                                                                                                                                                                                                                                                                                                                                                                                                                                                                                                                                                                                                                                                                                                                                                                                                                                                                                                                                                                                                                                                                                                                                                                     | 3.71                                                                          | 3            | s            |                   |
|                                                                                                                                                                                                                                                                                                                                                                                                                                                                                                                                                                                                                                                                                                                                                                                                                                                                                                                                                                                                                                                                                                                                                                                                                                                     | 3.78                                                                          | 3            | s            |                   |
|                                                                                                                                                                                                                                                                                                                                                                                                                                                                                                                                                                                                                                                                                                                                                                                                                                                                                                                                                                                                                                                                                                                                                                                                                                                     | 3.80                                                                          | 3            | s            |                   |
|                                                                                                                                                                                                                                                                                                                                                                                                                                                                                                                                                                                                                                                                                                                                                                                                                                                                                                                                                                                                                                                                                                                                                                                                                                                     | 5.20                                                                          | 1            | d            | 6.2               |
|                                                                                                                                                                                                                                                                                                                                                                                                                                                                                                                                                                                                                                                                                                                                                                                                                                                                                                                                                                                                                                                                                                                                                                                                                                                     | 6.43                                                                          | 1            | d            | 1.9               |
|                                                                                                                                                                                                                                                                                                                                                                                                                                                                                                                                                                                                                                                                                                                                                                                                                                                                                                                                                                                                                                                                                                                                                                                                                                                     | 6.46                                                                          | 1            | dd           | 8.8, 2.0          |
| 7.20                                                                                                                                                                                                                                                                                                                                                                                                                                                                                                                                                                                                                                                                                                                                                                                                                                                                                                                                                                                                                                                                                                                                                                                                                                                | 1                                                                             | d            | 8.4          |                   |
| <b><sup>13</sup>C NMR (100.6 MHz, CDCl<sub>3</sub>) δ :</b> 18.9, 22.8, 48.5, 51.8, 55.0, 55.1, 73.4, 98.1, 104.0, 120.5, 129.5, 157.9, 160.0, 178.1.                                                                                                                                                                                                                                                                                                                                                                                                                                                                                                                                                                                                                                                                                                                                                                                                                                                                                                                                                                                                                                                                                               |                                                                               |              |              |                   |

| Chem. Name                                                                                                                                                                                                                                                                                                                                                                                                                                                                                                                                                                                                                                                                                                                                                                                                                                                                                                                                                                                                                                                                                                                                                                                                                                                               | Methyl 3-hydroxy-2,2-dimethyl-3-phenylpropanoate (3b) |              |                                         |                   |
|--------------------------------------------------------------------------------------------------------------------------------------------------------------------------------------------------------------------------------------------------------------------------------------------------------------------------------------------------------------------------------------------------------------------------------------------------------------------------------------------------------------------------------------------------------------------------------------------------------------------------------------------------------------------------------------------------------------------------------------------------------------------------------------------------------------------------------------------------------------------------------------------------------------------------------------------------------------------------------------------------------------------------------------------------------------------------------------------------------------------------------------------------------------------------------------------------------------------------------------------------------------------------|-------------------------------------------------------|--------------|-----------------------------------------|-------------------|
| Lit. Ref.                                                                                                                                                                                                                                                                                                                                                                                                                                                                                                                                                                                                                                                                                                                                                                                                                                                                                                                                                                                                                                                                                                                                                                                                                                                                | Adv. Synth. Catal. 2004, 346, 1241.                   |              |                                         |                   |
| <p style="text-align: center;"> <math>\text{1b} + \text{2} \xrightarrow[\text{30 } ^\circ\text{C, 5 h}]{\text{1. Amb-F (5 mol\%), SolIFC, 60 } ^\circ\text{C, 3 h}}</math> <math>\text{3b}</math><br/> Mol.Wt.: 208 </p>                                                                                                                                                                                                                                                                                                                                                                                                                                                                                                                                                                                                                                                                                                                                                                                                                                                                                                                                                                                                                                                 |                                                       |              |                                         |                   |
| <p><b>METHOD:</b><br/> In a screw capped vial equipped with a magnetic stirrer benzaldehyde (<b>1b</b>) (0.106 g, 1.0 mmol), methyl trimethylsilyl dimethylketene acetal (<b>2</b>) (0.319 mL, 1.5 mmol) and Amb-F (0.020 g, 0.05 mmol, 2.5 mmol/g) were consecutively added and the resulting mixture was left under vigorous stirring at 60 °C. After 3 hours THF (2 mL) was added and the catalyst was filtered off. 20 mol% of DOWEX 50Wx8 H wet (25 mg) was added and the mixture was stirred at 30 °C for 5 h. Brine (1 mL) was then added, the solid catalyst filtered off and the organic phase was extracted with Et<sub>2</sub>O (2 x 2 mL). Organic layer was dried over sodium sulfate/potassium carbonate (2:1 mixture). Both methyl 2-methylpropionate, coming from the hydrolysis of the excess of <b>2</b>, and solvent were removed under high vacuum at 50 °C to give pure methyl 3-hydroxy-2,2-dimethyl-3-phenylpropanoate (<b>3b</b>) as a white solid (80% yield, 0.166 g) which was re-crystallized from <i>n</i>-Hexane/ EtOAc 9/1.<br/> E-factor = 28.9<br/> [0.106 g (aldehyde) + 0.273 g (methyl trimethylsilyl dimethylketene acetal) + 1.78 g (THF) + 2.8 g (Et<sub>2</sub>O extraction 2 x 2 mL) – 0.166 g (product x yield)] / 0.166 g</p> |                                                       |              |                                         |                   |
| <b>Mol Formula</b>                                                                                                                                                                                                                                                                                                                                                                                                                                                                                                                                                                                                                                                                                                                                                                                                                                                                                                                                                                                                                                                                                                                                                                                                                                                       | C <sub>12</sub> H <sub>16</sub> O <sub>3</sub>        | <b>m.p.</b>  | 68-69 °C ( <i>n</i> -Hexane/ EtOAc 9/1) |                   |
| <b>FT-IR (CHCl<sub>3</sub>, cm<sup>-1</sup>):</b> 3604, 3015, 1715.                                                                                                                                                                                                                                                                                                                                                                                                                                                                                                                                                                                                                                                                                                                                                                                                                                                                                                                                                                                                                                                                                                                                                                                                      |                                                       |              |                                         |                   |
| <b>Elemental Analysis:</b> Calcd. C, 69.21; H, 7.74; found C, 69.02; H, 7.50.                                                                                                                                                                                                                                                                                                                                                                                                                                                                                                                                                                                                                                                                                                                                                                                                                                                                                                                                                                                                                                                                                                                                                                                            |                                                       |              |                                         |                   |
| <b><sup>1</sup>H NMR</b><br>400 MHz<br>CDCl <sub>3</sub>                                                                                                                                                                                                                                                                                                                                                                                                                                                                                                                                                                                                                                                                                                                                                                                                                                                                                                                                                                                                                                                                                                                                                                                                                 | <b>δ value</b>                                        | <b>No. H</b> | <b>Mult.</b>                            | <b>j value/Hz</b> |
|                                                                                                                                                                                                                                                                                                                                                                                                                                                                                                                                                                                                                                                                                                                                                                                                                                                                                                                                                                                                                                                                                                                                                                                                                                                                          | 1.11                                                  | 3            | s                                       |                   |
|                                                                                                                                                                                                                                                                                                                                                                                                                                                                                                                                                                                                                                                                                                                                                                                                                                                                                                                                                                                                                                                                                                                                                                                                                                                                          | 1.15                                                  | 3            | s                                       |                   |
|                                                                                                                                                                                                                                                                                                                                                                                                                                                                                                                                                                                                                                                                                                                                                                                                                                                                                                                                                                                                                                                                                                                                                                                                                                                                          | 3.07                                                  | 1            | d                                       | 4.2               |
|                                                                                                                                                                                                                                                                                                                                                                                                                                                                                                                                                                                                                                                                                                                                                                                                                                                                                                                                                                                                                                                                                                                                                                                                                                                                          | 3.72                                                  | 3            | s                                       |                   |
|                                                                                                                                                                                                                                                                                                                                                                                                                                                                                                                                                                                                                                                                                                                                                                                                                                                                                                                                                                                                                                                                                                                                                                                                                                                                          | 4.90                                                  | 1            | d                                       | 4.1               |
|                                                                                                                                                                                                                                                                                                                                                                                                                                                                                                                                                                                                                                                                                                                                                                                                                                                                                                                                                                                                                                                                                                                                                                                                                                                                          | 7.31                                                  | 5            | m                                       |                   |
| <b><sup>13</sup>C NMR (100.6 MHz, CDCl<sub>3</sub>) δ :</b> 18.9, 22.9, 47.6, 52.0, 78.6, 127.5, 127.7 (one aromatic carbon is missing), 139.9, 178.0.                                                                                                                                                                                                                                                                                                                                                                                                                                                                                                                                                                                                                                                                                                                                                                                                                                                                                                                                                                                                                                                                                                                   |                                                       |              |                                         |                   |

| Chem. Name                                                                                                                                                                                                                                                                                                                                                                                                                                                                                                                                                                                                                                                                                                                                                                                                                                                                                                                                                                                                                                                                                                                                                                                                                             | Methyl 3-hydroxy-3-(3'-methoxyphenyl)-2,2-dimethylpropanoate (3c) |              |              |                   |
|----------------------------------------------------------------------------------------------------------------------------------------------------------------------------------------------------------------------------------------------------------------------------------------------------------------------------------------------------------------------------------------------------------------------------------------------------------------------------------------------------------------------------------------------------------------------------------------------------------------------------------------------------------------------------------------------------------------------------------------------------------------------------------------------------------------------------------------------------------------------------------------------------------------------------------------------------------------------------------------------------------------------------------------------------------------------------------------------------------------------------------------------------------------------------------------------------------------------------------------|-------------------------------------------------------------------|--------------|--------------|-------------------|
| Lit. Ref.                                                                                                                                                                                                                                                                                                                                                                                                                                                                                                                                                                                                                                                                                                                                                                                                                                                                                                                                                                                                                                                                                                                                                                                                                              | ---                                                               |              |              |                   |
| <p style="text-align: center;"><b>3c</b><br/>Mol.Wt.: 238</p>                                                                                                                                                                                                                                                                                                                                                                                                                                                                                                                                                                                                                                                                                                                                                                                                                                                                                                                                                                                                                                                                                                                                                                          |                                                                   |              |              |                   |
| <p><b>METHOD:</b></p> <p>In a screw capped vial equipped with a magnetic stirrer 3-methoxybenzaldehyde (<b>1c</b>) (0.136 g, 1.0 mmol), methyl trimethylsilyl dimethylketene acetal (<b>2</b>), (0.319 mL, 1.5 mmol) and Amb-F (0.020 g, 0.05 mmol, 2.5 mmol/g) were consecutively added and the resulting mixture was left under vigorous stirring at 60 °C. After 3 hours THF (2 mL) was added and the catalyst was filtered off. 20 mol% of DOWEX 50Wx8 H wet (25 mg) was added and the mixture was stirred at 30 °C for 5 h. Brine (1 mL) was then added, the solid catalyst filtered off and the organic phase was extracted with Et<sub>2</sub>O (2 x 2 mL). Organic layer was dried over sodium sulfate/potassium carbonate (2:1 mixture). Both methyl 2-methylpropionate, coming from the hydrolysis of the excess of <b>2</b>, and solvent were removed under high vacuum at 50 °C to give pure methyl 3-hydroxy-3-(3'-methoxyphenyl)-2,2-dimethylpropanoate (<b>3c</b>) as a colorless oil (87% yield, 0.207 g).<br/>E-factor = 23.1<br/>[0.136 g (aldehyde) + 0.273 g (methyl trimethylsilyl dimethylketene acetal) + 1.78 g (THF) + 2.8 g (Et<sub>2</sub>O extraction 2 x 2 mL) – 0.207 g (product x yield)] / 0.207 g</p> |                                                                   |              |              |                   |
| <b>Mol Formula</b>                                                                                                                                                                                                                                                                                                                                                                                                                                                                                                                                                                                                                                                                                                                                                                                                                                                                                                                                                                                                                                                                                                                                                                                                                     | C <sub>13</sub> H <sub>18</sub> O <sub>4</sub>                    | <b>m.p.</b>  | Oil          |                   |
| <b>FT-IR (CHCl<sub>3</sub>, cm<sup>-1</sup>):</b> 3602, 2876, 1719.                                                                                                                                                                                                                                                                                                                                                                                                                                                                                                                                                                                                                                                                                                                                                                                                                                                                                                                                                                                                                                                                                                                                                                    |                                                                   |              |              |                   |
| <b>Elemental Analysis:</b> Calcd. C, 65.53; H, 7.61; found C, 65.70; H, 7.42.                                                                                                                                                                                                                                                                                                                                                                                                                                                                                                                                                                                                                                                                                                                                                                                                                                                                                                                                                                                                                                                                                                                                                          |                                                                   |              |              |                   |
| <b><sup>1</sup>H NMR</b><br><b>400 MHz</b><br><b>CDCl<sub>3</sub></b>                                                                                                                                                                                                                                                                                                                                                                                                                                                                                                                                                                                                                                                                                                                                                                                                                                                                                                                                                                                                                                                                                                                                                                  | <b>δ value</b>                                                    | <b>No. H</b> | <b>Mult.</b> | <b>j value/Hz</b> |
|                                                                                                                                                                                                                                                                                                                                                                                                                                                                                                                                                                                                                                                                                                                                                                                                                                                                                                                                                                                                                                                                                                                                                                                                                                        | 1.10                                                              | 3            | s            |                   |
|                                                                                                                                                                                                                                                                                                                                                                                                                                                                                                                                                                                                                                                                                                                                                                                                                                                                                                                                                                                                                                                                                                                                                                                                                                        | 1.14                                                              | 3            | s            |                   |
|                                                                                                                                                                                                                                                                                                                                                                                                                                                                                                                                                                                                                                                                                                                                                                                                                                                                                                                                                                                                                                                                                                                                                                                                                                        | 3.13                                                              | 1            | d            | 4.2               |
|                                                                                                                                                                                                                                                                                                                                                                                                                                                                                                                                                                                                                                                                                                                                                                                                                                                                                                                                                                                                                                                                                                                                                                                                                                        | 3.70                                                              | 3            | s            |                   |
|                                                                                                                                                                                                                                                                                                                                                                                                                                                                                                                                                                                                                                                                                                                                                                                                                                                                                                                                                                                                                                                                                                                                                                                                                                        | 3.78                                                              | 3            | s            |                   |
|                                                                                                                                                                                                                                                                                                                                                                                                                                                                                                                                                                                                                                                                                                                                                                                                                                                                                                                                                                                                                                                                                                                                                                                                                                        | 4.85                                                              | 1            | d            | 4.1               |
|                                                                                                                                                                                                                                                                                                                                                                                                                                                                                                                                                                                                                                                                                                                                                                                                                                                                                                                                                                                                                                                                                                                                                                                                                                        | 6.81                                                              | 1            | d            | 8.2               |
|                                                                                                                                                                                                                                                                                                                                                                                                                                                                                                                                                                                                                                                                                                                                                                                                                                                                                                                                                                                                                                                                                                                                                                                                                                        | 6.85                                                              | 2            | m            |                   |
| 7.21                                                                                                                                                                                                                                                                                                                                                                                                                                                                                                                                                                                                                                                                                                                                                                                                                                                                                                                                                                                                                                                                                                                                                                                                                                   | 1                                                                 | t            | 8.1          |                   |
| <b><sup>13</sup>C NMR (100.6 MHz, CDCl<sub>3</sub>) δ :</b> 19.1, 22.9, 47.6, 52.0, 55.1, 78.5, 113.0, 113.3, 120.0, 128.6, 141.6, 159.0, 178.0.                                                                                                                                                                                                                                                                                                                                                                                                                                                                                                                                                                                                                                                                                                                                                                                                                                                                                                                                                                                                                                                                                       |                                                                   |              |              |                   |

|                                                                                                                                                                                                                                                                                                                                                                                                                                                                                                                                                                                                                                                                                                                                                                                                                                                                                                                                                                                                                                                                                                                                                                                                                                                                                                              |                                                                               |              |                                         |                   |
|--------------------------------------------------------------------------------------------------------------------------------------------------------------------------------------------------------------------------------------------------------------------------------------------------------------------------------------------------------------------------------------------------------------------------------------------------------------------------------------------------------------------------------------------------------------------------------------------------------------------------------------------------------------------------------------------------------------------------------------------------------------------------------------------------------------------------------------------------------------------------------------------------------------------------------------------------------------------------------------------------------------------------------------------------------------------------------------------------------------------------------------------------------------------------------------------------------------------------------------------------------------------------------------------------------------|-------------------------------------------------------------------------------|--------------|-----------------------------------------|-------------------|
| <b>Chem. Name</b>                                                                                                                                                                                                                                                                                                                                                                                                                                                                                                                                                                                                                                                                                                                                                                                                                                                                                                                                                                                                                                                                                                                                                                                                                                                                                            | <b>Methyl 3-hydroxy-2,2-dimethyl-3-[4'-(methylthio)phenyl]propanoate (3d)</b> |              |                                         |                   |
| <b>Lit. Ref.</b>                                                                                                                                                                                                                                                                                                                                                                                                                                                                                                                                                                                                                                                                                                                                                                                                                                                                                                                                                                                                                                                                                                                                                                                                                                                                                             | ---                                                                           |              |                                         |                   |
|                                                                                                                                                                                                                                                                                                                                                                                                                                                                                                                                                                                                                                                                                                                                                                                                                                                                                                                                                                                                                                                                                                                                                                                                                                                                                                              |                                                                               |              |                                         |                   |
| <p><b>METHOD:</b><br/> In a screw capped vial equipped with a magnetic stirrer 4-methylthiobenzaldehyde (<b>1d</b>) (0.152 g, 1.0 mmol), methyl trimethylsilyl dimethylketene acetal (<b>2</b>) (0.319 mL, 1.5 mmol) and Amb-F (0.020 g, 0.05 mmol, 2.5 mmol/g) were consecutively added and the resulting mixture was left under vigorous stirring at 60 °C. After 3 hours THF (2 mL) was added and the catalyst was filtered off. 20 mol% of DOWEX 50Wx8 H wet (25 mg) was added and the mixture was stirred at 30 °C for 5 h. Brine (1 mL) was then added, the solid catalyst filtered off and the organic phase was extracted with Et<sub>2</sub>O (2 x 2 mL). Organic layer was dried over sodium sulfate/potassium carbonate (2:1 mixture). Both methyl 2-methylpropionate, coming from the hydrolysis of the excess of <b>2</b>, and solvent were removed under high vacuum at 50 °C to give pure methyl methyl 3-hydroxy-2,2-dimethyl-3-[4'-(methylthio)phenyl]propanoate (<b>3d</b>) as a white solid (85% yield, 0.216 g) which was re-crystallized from <i>n</i>-Hexane/ EtOAc 9/1.<br/> E-factor = 22.2<br/> [0.152 g (aldehyde) + 0.273 g (methyl trimethylsilyl dimethylketene acetal) + 1.78 g (THF) + 2.8 g (Et<sub>2</sub>O extraction 2 x 2 mL) – 0.216 g (product x yield)] / 0.216 g</p> |                                                                               |              |                                         |                   |
| <b>Mol Formula</b>                                                                                                                                                                                                                                                                                                                                                                                                                                                                                                                                                                                                                                                                                                                                                                                                                                                                                                                                                                                                                                                                                                                                                                                                                                                                                           | C <sub>13</sub> H <sub>18</sub> O <sub>3</sub> S                              | <b>m.p.</b>  | 66-67 °C ( <i>n</i> -Hexane/ EtOAc 9/1) |                   |
| <b>FT-IR (CHCl<sub>3</sub>, cm<sup>-1</sup>):</b> 3609, 2999, 1717.                                                                                                                                                                                                                                                                                                                                                                                                                                                                                                                                                                                                                                                                                                                                                                                                                                                                                                                                                                                                                                                                                                                                                                                                                                          |                                                                               |              |                                         |                   |
| <b>Elemental Analysis:</b> Calcd. C, 61.39; H, 7.13; S, 12.61; found C; 61.09 H, 7.21 ; S, 12.17.                                                                                                                                                                                                                                                                                                                                                                                                                                                                                                                                                                                                                                                                                                                                                                                                                                                                                                                                                                                                                                                                                                                                                                                                            |                                                                               |              |                                         |                   |
| <b><sup>1</sup>H NMR</b><br><b>400 MHz</b><br><b>CDCl<sub>3</sub></b>                                                                                                                                                                                                                                                                                                                                                                                                                                                                                                                                                                                                                                                                                                                                                                                                                                                                                                                                                                                                                                                                                                                                                                                                                                        | <b>δ value</b>                                                                | <b>No. H</b> | <b>Mult.</b>                            | <b>j value/Hz</b> |
|                                                                                                                                                                                                                                                                                                                                                                                                                                                                                                                                                                                                                                                                                                                                                                                                                                                                                                                                                                                                                                                                                                                                                                                                                                                                                                              | 1.09                                                                          | 3            | s                                       |                   |
|                                                                                                                                                                                                                                                                                                                                                                                                                                                                                                                                                                                                                                                                                                                                                                                                                                                                                                                                                                                                                                                                                                                                                                                                                                                                                                              | 1.12                                                                          | 3            | s                                       |                   |
|                                                                                                                                                                                                                                                                                                                                                                                                                                                                                                                                                                                                                                                                                                                                                                                                                                                                                                                                                                                                                                                                                                                                                                                                                                                                                                              | 2.47                                                                          | 3            | s                                       |                   |
|                                                                                                                                                                                                                                                                                                                                                                                                                                                                                                                                                                                                                                                                                                                                                                                                                                                                                                                                                                                                                                                                                                                                                                                                                                                                                                              | 3.09                                                                          | 1            | d                                       | 4.0               |
|                                                                                                                                                                                                                                                                                                                                                                                                                                                                                                                                                                                                                                                                                                                                                                                                                                                                                                                                                                                                                                                                                                                                                                                                                                                                                                              | 3.71                                                                          | 3            | s                                       |                   |
|                                                                                                                                                                                                                                                                                                                                                                                                                                                                                                                                                                                                                                                                                                                                                                                                                                                                                                                                                                                                                                                                                                                                                                                                                                                                                                              | 4.84                                                                          | 1            | d                                       | 4.1               |
| 7.20                                                                                                                                                                                                                                                                                                                                                                                                                                                                                                                                                                                                                                                                                                                                                                                                                                                                                                                                                                                                                                                                                                                                                                                                                                                                                                         | 4                                                                             | m            |                                         |                   |
| <b><sup>13</sup>C NMR (100.6 MHz, CDCl<sub>3</sub>) δ :</b> 15.6, 18.9, 22.9, 47.6, 52.0, 78.2, 125.7, 128.0, 136.7, 137.7, 178.0.                                                                                                                                                                                                                                                                                                                                                                                                                                                                                                                                                                                                                                                                                                                                                                                                                                                                                                                                                                                                                                                                                                                                                                           |                                                                               |              |                                         |                   |



| Chem. Name                                                                                                                                                                                                                                                                                                                                                                                                                                                                                                                                                                                                                                                                                                                                                                                                                                                                                                                                                                                                                                                                                                                                                                                                                            | Methyl 3-hydroxy-2,2-dimethyl-3-(4'-propoxyphenyl)propanoate ( <b>3e</b> ) |              |              |                   |
|---------------------------------------------------------------------------------------------------------------------------------------------------------------------------------------------------------------------------------------------------------------------------------------------------------------------------------------------------------------------------------------------------------------------------------------------------------------------------------------------------------------------------------------------------------------------------------------------------------------------------------------------------------------------------------------------------------------------------------------------------------------------------------------------------------------------------------------------------------------------------------------------------------------------------------------------------------------------------------------------------------------------------------------------------------------------------------------------------------------------------------------------------------------------------------------------------------------------------------------|----------------------------------------------------------------------------|--------------|--------------|-------------------|
| Lit. Ref.                                                                                                                                                                                                                                                                                                                                                                                                                                                                                                                                                                                                                                                                                                                                                                                                                                                                                                                                                                                                                                                                                                                                                                                                                             | ---                                                                        |              |              |                   |
| <p>1. Amb-F (5 mol%)<br/>SolFC, 60 °C, 3 h</p> <p>2. Dowex-H (20 mol%)<br/>30 °C, 5 h</p> <p><b>3e</b><br/>Mol.Wt.: 266</p>                                                                                                                                                                                                                                                                                                                                                                                                                                                                                                                                                                                                                                                                                                                                                                                                                                                                                                                                                                                                                                                                                                           |                                                                            |              |              |                   |
| <p><b>METHOD:</b></p> <p>In a screw capped vial equipped with a magnetic stirrer 4-propoxybenzaldehyde (<b>1e</b>) (0.164 g, 1.0 mmol), methyl trimethylsilyl dimethylketene acetal (<b>2</b>) (0.319 mL, 1.5 mmol) and Amb-F (0.020 g, 0.05 mmol, 2.5 mmol/g) were consecutively added and the resulting mixture was left under vigorous stirring at 60 °C. After 3 hours THF (2 mL) was added and the catalyst was filtered off. 20 mol% of DOWEX 50Wx8 H wet (25 mg) was added and the mixture was stirred at 30 °C for 5 h. Brine (1 mL) was then added, the solid catalyst filtered off and the organic phase was extracted with Et<sub>2</sub>O (2 x 2 mL). Organic layer was dried over sodium sulfate/potassium carbonate (2:1 mixture). Both methyl 2-methylpropanoate, coming from the hydrolysis of the excess of <b>2</b>, and solvent were removed under high vacuum at 50 °C to give pure methyl 3-hydroxy-2,2-dimethyl-3-(4'-propoxyphenyl)propanoate (<b>3e</b>) as a colorless oil (83% yield, 0.221 g).<br/>E-factor = 21.7<br/>[0.164 g (aldehyde) + 0.273 g (methyl trimethylsilyl dimethylketene acetal) + 1.78 g (THF) + 2.8 g (Et<sub>2</sub>O extraction 2 x 2 mL) – 0.221 g (product x yield)] / 0.221 g</p> |                                                                            |              |              |                   |
| <b>Mol Formula</b>                                                                                                                                                                                                                                                                                                                                                                                                                                                                                                                                                                                                                                                                                                                                                                                                                                                                                                                                                                                                                                                                                                                                                                                                                    | C <sub>15</sub> H <sub>22</sub> O <sub>4</sub>                             | <b>m.p.</b>  | Oil          |                   |
| <b>FT-IR (CHCl<sub>3</sub>, cm<sup>-1</sup>):</b> 3592, 2966, 1713.                                                                                                                                                                                                                                                                                                                                                                                                                                                                                                                                                                                                                                                                                                                                                                                                                                                                                                                                                                                                                                                                                                                                                                   |                                                                            |              |              |                   |
| <b>Elemental Analysis:</b> Calcd. C, 67.64; H, 8.33; found C, 67.39 H, 8.16.                                                                                                                                                                                                                                                                                                                                                                                                                                                                                                                                                                                                                                                                                                                                                                                                                                                                                                                                                                                                                                                                                                                                                          |                                                                            |              |              |                   |
| <b><sup>1</sup>H NMR</b><br><b>400 MHz</b><br><b>CDCl<sub>3</sub></b>                                                                                                                                                                                                                                                                                                                                                                                                                                                                                                                                                                                                                                                                                                                                                                                                                                                                                                                                                                                                                                                                                                                                                                 | <b>δ value</b>                                                             | <b>No. H</b> | <b>Mult.</b> | <b>j value/Hz</b> |
|                                                                                                                                                                                                                                                                                                                                                                                                                                                                                                                                                                                                                                                                                                                                                                                                                                                                                                                                                                                                                                                                                                                                                                                                                                       | 1.03                                                                       | 3            | <i>t</i>     | 7.4               |
|                                                                                                                                                                                                                                                                                                                                                                                                                                                                                                                                                                                                                                                                                                                                                                                                                                                                                                                                                                                                                                                                                                                                                                                                                                       | 1.08                                                                       | 3            | <i>s</i>     |                   |
|                                                                                                                                                                                                                                                                                                                                                                                                                                                                                                                                                                                                                                                                                                                                                                                                                                                                                                                                                                                                                                                                                                                                                                                                                                       | 1.13                                                                       | 3            | <i>s</i>     |                   |
|                                                                                                                                                                                                                                                                                                                                                                                                                                                                                                                                                                                                                                                                                                                                                                                                                                                                                                                                                                                                                                                                                                                                                                                                                                       | 1.80                                                                       | 2            | <i>sex</i>   | 21.7, 14.7, 7.5   |
|                                                                                                                                                                                                                                                                                                                                                                                                                                                                                                                                                                                                                                                                                                                                                                                                                                                                                                                                                                                                                                                                                                                                                                                                                                       | 3.01                                                                       | 1            | <i>bs</i>    |                   |
|                                                                                                                                                                                                                                                                                                                                                                                                                                                                                                                                                                                                                                                                                                                                                                                                                                                                                                                                                                                                                                                                                                                                                                                                                                       | 3.70                                                                       | 3            | <i>s</i>     |                   |
|                                                                                                                                                                                                                                                                                                                                                                                                                                                                                                                                                                                                                                                                                                                                                                                                                                                                                                                                                                                                                                                                                                                                                                                                                                       | 3.90                                                                       | 2            | <i>t</i>     | 6.6               |
|                                                                                                                                                                                                                                                                                                                                                                                                                                                                                                                                                                                                                                                                                                                                                                                                                                                                                                                                                                                                                                                                                                                                                                                                                                       | 4.83                                                                       | 1            | <i>s</i>     |                   |
|                                                                                                                                                                                                                                                                                                                                                                                                                                                                                                                                                                                                                                                                                                                                                                                                                                                                                                                                                                                                                                                                                                                                                                                                                                       | 6.83                                                                       | 2            | <i>d</i>     | 8.5               |
| 7.19                                                                                                                                                                                                                                                                                                                                                                                                                                                                                                                                                                                                                                                                                                                                                                                                                                                                                                                                                                                                                                                                                                                                                                                                                                  | 2                                                                          | <i>d</i>     | 8.5          |                   |
| <b><sup>13</sup>C NMR (100.6 MHz, CDCl<sub>3</sub>) δ :</b> 10.4, 18.9, 22.5, 22.8, 47.7, 51.9, 69.4, 78.2, 116.6, 128.5, 131.8, 158.6, 178.1.                                                                                                                                                                                                                                                                                                                                                                                                                                                                                                                                                                                                                                                                                                                                                                                                                                                                                                                                                                                                                                                                                        |                                                                            |              |              |                   |

| Chem. Name                                                                                                                                                                                                                                                                                                                                                                                                                                                                                                                                                                                                                                                                                                                                                                                                                                                                                                                                                                                                                                                                                                                                                                                                                                                                                                            | Methyl 3-hydroxy-3-mesityl-2,2-dimethylpropanoate (3f) |              |                                         |                   |
|-----------------------------------------------------------------------------------------------------------------------------------------------------------------------------------------------------------------------------------------------------------------------------------------------------------------------------------------------------------------------------------------------------------------------------------------------------------------------------------------------------------------------------------------------------------------------------------------------------------------------------------------------------------------------------------------------------------------------------------------------------------------------------------------------------------------------------------------------------------------------------------------------------------------------------------------------------------------------------------------------------------------------------------------------------------------------------------------------------------------------------------------------------------------------------------------------------------------------------------------------------------------------------------------------------------------------|--------------------------------------------------------|--------------|-----------------------------------------|-------------------|
| Lit. Ref.                                                                                                                                                                                                                                                                                                                                                                                                                                                                                                                                                                                                                                                                                                                                                                                                                                                                                                                                                                                                                                                                                                                                                                                                                                                                                                             | ---                                                    |              |                                         |                   |
| <p style="text-align: center;"><b>1f</b> + <b>2</b> <math>\xrightarrow[\text{2. Dowex-H (20 mol\%), 30 }^\circ\text{C, 5 h}]{\text{1. Amb-F (5 mol\%), SolFC, 60 }^\circ\text{C, 3 h}}</math> <b>3f</b><br/>Mol. Wt.: 250</p>                                                                                                                                                                                                                                                                                                                                                                                                                                                                                                                                                                                                                                                                                                                                                                                                                                                                                                                                                                                                                                                                                         |                                                        |              |                                         |                   |
| <p><b>METHOD:</b><br/>           In a screw capped vial equipped with a magnetic stirrer 2,4,6-trimethylbenzaldehyde (<b>1f</b>) (0.148 g, 1.0 mmol), methyl trimethylsilyl dimethylketene acetal (<b>2</b>) (0.319 mL, 1.5 mmol) and Amb-F (0.020 g, 0.05 mmol, 2.5mmol/g) were consecutively added and the resulting mixture was left under vigorous stirring at 60 °C. After 3 hours THF (2 mL) was added and the catalyst was filtered off. 20 mol% of DOWEX 50Wx8 H wet (25 mg) was added and the mixture was stirred at 30 °C for 5 h. Brine (1 mL) was then added, the solid catalyst filtered off and the organic phase was extracted with Et<sub>2</sub>O (2 x 2 mL). Organic layer was dried over sodium sulfate/potassium carbonate (2:1 mixture). Both methyl 2-methylpropionate, coming from the hydrolysis of the excess of <b>2</b>, and solvent were removed under high vacuum at 50 °C to give pure methyl 3-hydroxy-3-mesityl-2,2-dimethylpropanoate (<b>3f</b>) as a white solid (89% yield, 0.222 g) which was re-crystallized from <i>n</i>-Hexane/ EtOAc 9/1.<br/>           E-factor = 21.5<br/>           [0.148 g (aldehyde) + 0.273 g (methyl trimethylsilyl dimethylketene acetal) + 1.78 g (THF) + 2.8 g (Et<sub>2</sub>O extraction 2 x 2 mL) – 0.222 g (product x yield)] / 0.222 g</p> |                                                        |              |                                         |                   |
| <b>Mol Formula</b>                                                                                                                                                                                                                                                                                                                                                                                                                                                                                                                                                                                                                                                                                                                                                                                                                                                                                                                                                                                                                                                                                                                                                                                                                                                                                                    | C <sub>15</sub> H <sub>22</sub> O <sub>3</sub>         | <b>m.p.</b>  | 64-65 °C ( <i>n</i> -Hexane/ EtOAc 9/1) |                   |
| <b>FT-IR (CHCl<sub>3</sub>, cm<sup>-1</sup>):</b> 3610, 2954, 1717.                                                                                                                                                                                                                                                                                                                                                                                                                                                                                                                                                                                                                                                                                                                                                                                                                                                                                                                                                                                                                                                                                                                                                                                                                                                   |                                                        |              |                                         |                   |
| <b>Elemental Analysis:</b> Calcd. C, 71.97; H, 8.86; found C, 72.13; H, 8.64.                                                                                                                                                                                                                                                                                                                                                                                                                                                                                                                                                                                                                                                                                                                                                                                                                                                                                                                                                                                                                                                                                                                                                                                                                                         |                                                        |              |                                         |                   |
| <b><sup>1</sup>H NMR</b><br><b>400 MHz</b><br><b>CDCl<sub>3</sub></b>                                                                                                                                                                                                                                                                                                                                                                                                                                                                                                                                                                                                                                                                                                                                                                                                                                                                                                                                                                                                                                                                                                                                                                                                                                                 | <b>δ value</b>                                         | <b>No. H</b> | <b>Mult.</b>                            | <b>j value/Hz</b> |
|                                                                                                                                                                                                                                                                                                                                                                                                                                                                                                                                                                                                                                                                                                                                                                                                                                                                                                                                                                                                                                                                                                                                                                                                                                                                                                                       | 1.14                                                   | 3            | s                                       |                   |
|                                                                                                                                                                                                                                                                                                                                                                                                                                                                                                                                                                                                                                                                                                                                                                                                                                                                                                                                                                                                                                                                                                                                                                                                                                                                                                                       | 1.26                                                   | 3            | s                                       |                   |
|                                                                                                                                                                                                                                                                                                                                                                                                                                                                                                                                                                                                                                                                                                                                                                                                                                                                                                                                                                                                                                                                                                                                                                                                                                                                                                                       | 2.25                                                   | 3            | s                                       |                   |
|                                                                                                                                                                                                                                                                                                                                                                                                                                                                                                                                                                                                                                                                                                                                                                                                                                                                                                                                                                                                                                                                                                                                                                                                                                                                                                                       | 2.35                                                   | 3            | s                                       |                   |
|                                                                                                                                                                                                                                                                                                                                                                                                                                                                                                                                                                                                                                                                                                                                                                                                                                                                                                                                                                                                                                                                                                                                                                                                                                                                                                                       | 2.40                                                   | 3            | s                                       |                   |
|                                                                                                                                                                                                                                                                                                                                                                                                                                                                                                                                                                                                                                                                                                                                                                                                                                                                                                                                                                                                                                                                                                                                                                                                                                                                                                                       | 2.81                                                   | 1            | d                                       | 3.8               |
|                                                                                                                                                                                                                                                                                                                                                                                                                                                                                                                                                                                                                                                                                                                                                                                                                                                                                                                                                                                                                                                                                                                                                                                                                                                                                                                       | 3.75                                                   | 3            | s                                       |                   |
|                                                                                                                                                                                                                                                                                                                                                                                                                                                                                                                                                                                                                                                                                                                                                                                                                                                                                                                                                                                                                                                                                                                                                                                                                                                                                                                       | 5.57                                                   | 1            | d                                       | 3.5               |
|                                                                                                                                                                                                                                                                                                                                                                                                                                                                                                                                                                                                                                                                                                                                                                                                                                                                                                                                                                                                                                                                                                                                                                                                                                                                                                                       | 6.82                                                   | 1            | bs                                      |                   |
| 6.84                                                                                                                                                                                                                                                                                                                                                                                                                                                                                                                                                                                                                                                                                                                                                                                                                                                                                                                                                                                                                                                                                                                                                                                                                                                                                                                  | 1                                                      | bs           |                                         |                   |
| <b><sup>13</sup>C NMR (100.6 MHz, CDCl<sub>3</sub>) δ :</b> 20.5, 20.6, 22.1, 23.9, 49.9, 52.0, 75.7, 76.6, 76.9, 77.3, 129.1, 131.7, 132.2, 136.4, 178.5.                                                                                                                                                                                                                                                                                                                                                                                                                                                                                                                                                                                                                                                                                                                                                                                                                                                                                                                                                                                                                                                                                                                                                            |                                                        |              |                                         |                   |

| Chem. Name                                                                                                                                                                                                                                                                                                                                                                                                                                                                                                                                                                                                                                                                                                                                                                                                                                                                                                                                                                                                                                                                                                                                                                                                                                                                                     | Methyl 3-hydroxy-2,2-dimethyl-3-thien-2'-ylpropanoate ( <b>3g</b> ) |              |                                         |                   |
|------------------------------------------------------------------------------------------------------------------------------------------------------------------------------------------------------------------------------------------------------------------------------------------------------------------------------------------------------------------------------------------------------------------------------------------------------------------------------------------------------------------------------------------------------------------------------------------------------------------------------------------------------------------------------------------------------------------------------------------------------------------------------------------------------------------------------------------------------------------------------------------------------------------------------------------------------------------------------------------------------------------------------------------------------------------------------------------------------------------------------------------------------------------------------------------------------------------------------------------------------------------------------------------------|---------------------------------------------------------------------|--------------|-----------------------------------------|-------------------|
| Lit. Ref.                                                                                                                                                                                                                                                                                                                                                                                                                                                                                                                                                                                                                                                                                                                                                                                                                                                                                                                                                                                                                                                                                                                                                                                                                                                                                      | -                                                                   |              |                                         |                   |
| <p style="text-align: center;"><b>3g</b><br/>Mol.Wt.: 214</p>                                                                                                                                                                                                                                                                                                                                                                                                                                                                                                                                                                                                                                                                                                                                                                                                                                                                                                                                                                                                                                                                                                                                                                                                                                  |                                                                     |              |                                         |                   |
| <p><b>METHOD:</b></p> <p>In a screw capped vial equipped with a magnetic stirrer thiophene-2-carbaldehyde (<b>1g</b>) (0.112 g, 1.0mmol), methyl trimethylsilyl dimethylketene acetal (<b>2</b>) (0.319 mL, 1.5 mmol) and Amb-F (0.020 g, 0.05 mmol, 2.5 mmol/g) were consecutively added and the resulting mixture was left under vigorous stirring at 60 °C. After 3 hours THF (2 mL) was added and the catalyst was filtered off. 20 mol% of DOWEX 50Wx8 H wet (25 mg) was added and the mixture was stirred at 30 °C for 5 h. Brine (1 mL) was then added, the solid catalyst filtered off and the organic phase was extracted with Et<sub>2</sub>O (2 x 2 mL). Organic layer was dried over sodium sulfate/potassium carbonate (2:1 mixture). Both methyl 2-methylpropionate, coming from the hydrolysis of the excess of <b>2</b>, and solvent were removed under high vacuum at 50 °C to give pure methyl 3-hydroxy-2,2-dimethyl-3-thien-2'-ylpropanoate (<b>3g</b>) as a white solid (82% yield, 0.175 g) which was re-crystallized from <i>n</i>-Hexane/ EtOAc 9/1.</p> <p>E-factor = 27.4</p> <p>[0.112 g (aldehyde) + 0.273 g (methyl trimethylsilyl dimethylketene acetal) + 1.78 g (THF) + 2.8 g (Et<sub>2</sub>O extraction 2 x 2 mL) – 0.175 g (product x yield)] / 0.175 g</p> |                                                                     |              |                                         |                   |
| <b>Mol Formula</b>                                                                                                                                                                                                                                                                                                                                                                                                                                                                                                                                                                                                                                                                                                                                                                                                                                                                                                                                                                                                                                                                                                                                                                                                                                                                             | C <sub>10</sub> H <sub>14</sub> O <sub>3</sub> S                    | <b>m.p.</b>  | 52-53 °C ( <i>n</i> -Hexane/ EtOAc 9/1) |                   |
| <b>FT-IR (CHCl<sub>3</sub>, cm<sup>-1</sup>):</b> 3599, 3010, 1712.                                                                                                                                                                                                                                                                                                                                                                                                                                                                                                                                                                                                                                                                                                                                                                                                                                                                                                                                                                                                                                                                                                                                                                                                                            |                                                                     |              |                                         |                   |
| <b>Elemental Analysis:</b> Calcd. C, 56.05; H, 6.59; S, 14.96; found C, 56.23; H, 6.38; S, 14.81.                                                                                                                                                                                                                                                                                                                                                                                                                                                                                                                                                                                                                                                                                                                                                                                                                                                                                                                                                                                                                                                                                                                                                                                              |                                                                     |              |                                         |                   |
| <b><sup>1</sup>H NMR</b><br><b>400 MHz</b><br><b>CDCl<sub>3</sub></b>                                                                                                                                                                                                                                                                                                                                                                                                                                                                                                                                                                                                                                                                                                                                                                                                                                                                                                                                                                                                                                                                                                                                                                                                                          | <b>δ value</b>                                                      | <b>No. H</b> | <b>Mult.</b>                            | <b>j value/Hz</b> |
|                                                                                                                                                                                                                                                                                                                                                                                                                                                                                                                                                                                                                                                                                                                                                                                                                                                                                                                                                                                                                                                                                                                                                                                                                                                                                                | 1.20                                                                | 3            | s                                       |                   |
|                                                                                                                                                                                                                                                                                                                                                                                                                                                                                                                                                                                                                                                                                                                                                                                                                                                                                                                                                                                                                                                                                                                                                                                                                                                                                                | 1.22                                                                | 3            | s                                       |                   |
|                                                                                                                                                                                                                                                                                                                                                                                                                                                                                                                                                                                                                                                                                                                                                                                                                                                                                                                                                                                                                                                                                                                                                                                                                                                                                                | 3.33                                                                | 1            | d                                       | 5.1               |
|                                                                                                                                                                                                                                                                                                                                                                                                                                                                                                                                                                                                                                                                                                                                                                                                                                                                                                                                                                                                                                                                                                                                                                                                                                                                                                | 3.73                                                                | 3            | s                                       |                   |
|                                                                                                                                                                                                                                                                                                                                                                                                                                                                                                                                                                                                                                                                                                                                                                                                                                                                                                                                                                                                                                                                                                                                                                                                                                                                                                | 5.10                                                                | 1            | d                                       | 4.9               |
|                                                                                                                                                                                                                                                                                                                                                                                                                                                                                                                                                                                                                                                                                                                                                                                                                                                                                                                                                                                                                                                                                                                                                                                                                                                                                                | 6.95                                                                | 2            | m                                       |                   |
| 7.23                                                                                                                                                                                                                                                                                                                                                                                                                                                                                                                                                                                                                                                                                                                                                                                                                                                                                                                                                                                                                                                                                                                                                                                                                                                                                           | 1                                                                   | d            | 4.9                                     |                   |
| <b><sup>13</sup>C NMR (100.6 MHz, CDCl<sub>3</sub>) δ :</b> 19.8, 22.7, 47.6, 52.1, 75.5, 124.7, 125.5, 126.1, 143.6, 177.8.                                                                                                                                                                                                                                                                                                                                                                                                                                                                                                                                                                                                                                                                                                                                                                                                                                                                                                                                                                                                                                                                                                                                                                   |                                                                     |              |                                         |                   |

|                                                                                                                                                                                                                                                                                                                                                                                                                                                                                                                                                                                                                                                                                                                                                                                                                                                                                                                                                                                                                                                                                                                                                                                                                                                                                                                                                                               |                                                                        |              |                                           |                   |
|-------------------------------------------------------------------------------------------------------------------------------------------------------------------------------------------------------------------------------------------------------------------------------------------------------------------------------------------------------------------------------------------------------------------------------------------------------------------------------------------------------------------------------------------------------------------------------------------------------------------------------------------------------------------------------------------------------------------------------------------------------------------------------------------------------------------------------------------------------------------------------------------------------------------------------------------------------------------------------------------------------------------------------------------------------------------------------------------------------------------------------------------------------------------------------------------------------------------------------------------------------------------------------------------------------------------------------------------------------------------------------|------------------------------------------------------------------------|--------------|-------------------------------------------|-------------------|
| <b>Chem. Name</b>                                                                                                                                                                                                                                                                                                                                                                                                                                                                                                                                                                                                                                                                                                                                                                                                                                                                                                                                                                                                                                                                                                                                                                                                                                                                                                                                                             | <b>Methyl 3-(4'-cyanophenyl)-3-hydroxy-2,2-dimethylpropanoate (3h)</b> |              |                                           |                   |
| <b>Lit. Ref.</b>                                                                                                                                                                                                                                                                                                                                                                                                                                                                                                                                                                                                                                                                                                                                                                                                                                                                                                                                                                                                                                                                                                                                                                                                                                                                                                                                                              | <i>Adv. Synth. Catal.</i> <b>2004</b> , 346, 1241.                     |              |                                           |                   |
|                                                                                                                                                                                                                                                                                                                                                                                                                                                                                                                                                                                                                                                                                                                                                                                                                                                                                                                                                                                                                                                                                                                                                                                                                                                                                                                                                                               |                                                                        |              |                                           |                   |
| <p><b>METHOD:</b><br/> In a screw capped vial equipped with a magnetic stirrer 4-cyanobenzaldehyde (<b>1h</b>) (0.131 g, 1.0 mmol), methyl trimethylsilyl dimethylketene acetal (<b>2</b>) (0.638 mL, 3.0 mmol), Amb-F (0.020 g, 0.05 mmol, 2.5 mmol/g) and de-ionized H<sub>2</sub>O (0.009 mL, 0.5 mmol) were consecutively added and the resulting mixture was left under vigorous stirring at 60 °C. After 6 hours THF (2 mL) was added and the catalyst was filtered off. 20 mol% of DOWEX 50Wx8 H wet (25 mg) was added and the mixture was stirred at 30 °C for 5 h. Brine (1 mL) was then added, the solid catalyst filtered off and the organic phase was extracted with Et<sub>2</sub>O (2 x 2 mL). Organic layer was dried over sodium sulfate/potassium carbonate (2:1 mixture). Both methyl 2-methylpropanoate, coming from the hydrolysis of the excess of <b>2</b>, and solvent were removed under high vacuum at 50 °C to give methyl 3-(4'-cyanophenyl)-3-hydroxy-2,2-dimethylpropanoate (<b>3h</b>) as a white solid in 95% purity (83% yield, 0.193 g) which was re-crystallized from <i>n</i>-Hexane/ EtOAc 9/1.<br/> E-factor = 24.9<br/> [0.131 g (aldehyde) + 0.273 g (methyl trimethylsilyl dimethylketene acetal) + 0.009 g (H<sub>2</sub>O) + 1.78 g (THF) + 2.8 g (Et<sub>2</sub>O extraction 2 x 2 mL) – 0.193 g (product x yield)] / 0.193 g</p> |                                                                        |              |                                           |                   |
| <b>Mol Formula</b>                                                                                                                                                                                                                                                                                                                                                                                                                                                                                                                                                                                                                                                                                                                                                                                                                                                                                                                                                                                                                                                                                                                                                                                                                                                                                                                                                            | C <sub>13</sub> H <sub>15</sub> NO <sub>3</sub>                        | <b>m.p.</b>  | 100-101 °C ( <i>n</i> -Hexane/ EtOAc 9/1) |                   |
| <b>FT-IR (CHCl<sub>3</sub>, cm<sup>-1</sup>):</b> 3607, 3011, 2234, 1709.                                                                                                                                                                                                                                                                                                                                                                                                                                                                                                                                                                                                                                                                                                                                                                                                                                                                                                                                                                                                                                                                                                                                                                                                                                                                                                     |                                                                        |              |                                           |                   |
| <b>Elemental Analysis:</b> Calcd. C, 66.94; H, 6.48; N, 6.00; found C, 70.06; H, 6.34; N, 6.17.                                                                                                                                                                                                                                                                                                                                                                                                                                                                                                                                                                                                                                                                                                                                                                                                                                                                                                                                                                                                                                                                                                                                                                                                                                                                               |                                                                        |              |                                           |                   |
| <b><sup>1</sup>H NMR<br/>400 MHz<br/>CDCl<sub>3</sub></b>                                                                                                                                                                                                                                                                                                                                                                                                                                                                                                                                                                                                                                                                                                                                                                                                                                                                                                                                                                                                                                                                                                                                                                                                                                                                                                                     | <b>δ value</b>                                                         | <b>No. H</b> | <b>Mult.</b>                              | <b>j value/Hz</b> |
|                                                                                                                                                                                                                                                                                                                                                                                                                                                                                                                                                                                                                                                                                                                                                                                                                                                                                                                                                                                                                                                                                                                                                                                                                                                                                                                                                                               | 1.10                                                                   | 3            | s                                         |                   |
|                                                                                                                                                                                                                                                                                                                                                                                                                                                                                                                                                                                                                                                                                                                                                                                                                                                                                                                                                                                                                                                                                                                                                                                                                                                                                                                                                                               | 1.12                                                                   | 3            | s                                         |                   |
|                                                                                                                                                                                                                                                                                                                                                                                                                                                                                                                                                                                                                                                                                                                                                                                                                                                                                                                                                                                                                                                                                                                                                                                                                                                                                                                                                                               | 3.33                                                                   | 1            | bs                                        |                   |
|                                                                                                                                                                                                                                                                                                                                                                                                                                                                                                                                                                                                                                                                                                                                                                                                                                                                                                                                                                                                                                                                                                                                                                                                                                                                                                                                                                               | 3.72                                                                   | 3            | s                                         |                   |
|                                                                                                                                                                                                                                                                                                                                                                                                                                                                                                                                                                                                                                                                                                                                                                                                                                                                                                                                                                                                                                                                                                                                                                                                                                                                                                                                                                               | 4.94                                                                   | 1            | s                                         |                   |
|                                                                                                                                                                                                                                                                                                                                                                                                                                                                                                                                                                                                                                                                                                                                                                                                                                                                                                                                                                                                                                                                                                                                                                                                                                                                                                                                                                               | 7.42                                                                   | 2            | d                                         | 8.2               |
| 7.61                                                                                                                                                                                                                                                                                                                                                                                                                                                                                                                                                                                                                                                                                                                                                                                                                                                                                                                                                                                                                                                                                                                                                                                                                                                                                                                                                                          | 2                                                                      | d            | 8.2                                       |                   |
| <b><sup>13</sup>C NMR (100.6 MHz, CDCl<sub>3</sub>) δ :</b> 19.0, 22.6, 47.5, 52.2, 77.8, 111.5, 118.6, 128.3, 131.4, 145.2, 177.6.                                                                                                                                                                                                                                                                                                                                                                                                                                                                                                                                                                                                                                                                                                                                                                                                                                                                                                                                                                                                                                                                                                                                                                                                                                           |                                                                        |              |                                           |                   |

|                                                                                                                                                                                                                                                                                                                                                                                                                                                                                                                                                                                                                                                                                                                                                                                                                                                                                                                                                                                                                                                                                                                                                                                                                                                                                                                                                                                |                                                                         |              |                                         |                   |
|--------------------------------------------------------------------------------------------------------------------------------------------------------------------------------------------------------------------------------------------------------------------------------------------------------------------------------------------------------------------------------------------------------------------------------------------------------------------------------------------------------------------------------------------------------------------------------------------------------------------------------------------------------------------------------------------------------------------------------------------------------------------------------------------------------------------------------------------------------------------------------------------------------------------------------------------------------------------------------------------------------------------------------------------------------------------------------------------------------------------------------------------------------------------------------------------------------------------------------------------------------------------------------------------------------------------------------------------------------------------------------|-------------------------------------------------------------------------|--------------|-----------------------------------------|-------------------|
| <b>Chem. Name</b>                                                                                                                                                                                                                                                                                                                                                                                                                                                                                                                                                                                                                                                                                                                                                                                                                                                                                                                                                                                                                                                                                                                                                                                                                                                                                                                                                              | <b>Methyl 3-(4'-chlorophenyl)-3-hydroxy-2,2-dimethylpropanoate (3i)</b> |              |                                         |                   |
| <b>Lit. Ref.</b>                                                                                                                                                                                                                                                                                                                                                                                                                                                                                                                                                                                                                                                                                                                                                                                                                                                                                                                                                                                                                                                                                                                                                                                                                                                                                                                                                               | <i>Adv. Synth. Catal.</i> <b>2004</b> , 346, 1241.                      |              |                                         |                   |
| <p style="text-align: center;"> <math>\text{1i} + \text{2} \xrightarrow[\text{30 } ^\circ\text{C, 5 h}]{\text{1. Amb-F (5 mol\%), water 50 mol\%, SolFC, 60 } ^\circ\text{C, 6 h}}</math> <math>\text{3i}</math> </p> <p style="text-align: center;">Mol.Wt.: 243</p>                                                                                                                                                                                                                                                                                                                                                                                                                                                                                                                                                                                                                                                                                                                                                                                                                                                                                                                                                                                                                                                                                                          |                                                                         |              |                                         |                   |
| <p><b>METHOD:</b><br/> In a screw capped vial equipped with a magnetic stirrer 4-chlorobenzaldehyde (<b>1i</b>) (0.140 g, 1.0mmol), methyl trimethylsilyl dimethylketene acetal (<b>2</b>) (0.638 mL, 3.0 mmol), Amb-F (0.020 g, 0.05 mmol, 2.5 mmol/g) and de-ionized H<sub>2</sub>O (0.009 mL, 0.5 mmol) were consecutively added and the resulting mixture was left under vigorous stirring at 60 °C. After 6 hours THF (2 mL) was added and the catalyst was filtered off. 20 mol% of DOWEX 50Wx8 H wet (25 mg) was added and the mixture was stirred at 30 °C for 5 h. Brine (1 mL) was then added, the solid catalyst filtered off and the organic phase was extracted with Et<sub>2</sub>O (2 x 2 mL). Organic layer was dried over sodium sulfate/potassium carbonate (2:1 mixture). Both methyl 2-methylpropanoate, coming from the hydrolysis of the excess of <b>2</b>, and solvent were removed under high vacuum at 50 °C to give methyl 3-(4'-chlorophenyl)-3-hydroxy-2,2-dimethylpropanoate (<b>3i</b>) as a white solid in 97% purity (85% yield, 0.206 g) which was re-crystallized from <i>n</i>-Hexane/ EtOAc 9/1.<br/> E-factor = 23.2<br/> [0.140 g (aldehyde) + 0.273 g (methyl trimethylsilyl dimethylketene acetal) + 0.009 g (H<sub>2</sub>O) + 1.78 g (THF) + 2.8 g (Et<sub>2</sub>O extraction 2 x 2 mL) – 0.207 g (product x yield)] / 0.207 g</p> |                                                                         |              |                                         |                   |
| <b>Mol Formula</b>                                                                                                                                                                                                                                                                                                                                                                                                                                                                                                                                                                                                                                                                                                                                                                                                                                                                                                                                                                                                                                                                                                                                                                                                                                                                                                                                                             | C <sub>12</sub> H <sub>15</sub> ClO <sub>3</sub>                        | <b>m.p.</b>  | 62-63 °C ( <i>n</i> -Hexane/ EtOAc 9/1) |                   |
| <b>FT-IR (CHCl<sub>3</sub>, cm<sup>-1</sup>):</b> 3614, 3008, 1715.                                                                                                                                                                                                                                                                                                                                                                                                                                                                                                                                                                                                                                                                                                                                                                                                                                                                                                                                                                                                                                                                                                                                                                                                                                                                                                            |                                                                         |              |                                         |                   |
| <b>Elemental Analysis:</b> Calcd. C, 59.39; H, 6.23; Cl, 14.61; found C, 59.27; H, 6.16; N, 14.53.                                                                                                                                                                                                                                                                                                                                                                                                                                                                                                                                                                                                                                                                                                                                                                                                                                                                                                                                                                                                                                                                                                                                                                                                                                                                             |                                                                         |              |                                         |                   |
| <b><sup>1</sup>H NMR</b><br><b>400 MHz</b><br><b>CDCl<sub>3</sub></b>                                                                                                                                                                                                                                                                                                                                                                                                                                                                                                                                                                                                                                                                                                                                                                                                                                                                                                                                                                                                                                                                                                                                                                                                                                                                                                          | <b>δ value</b>                                                          | <b>No. H</b> | <b>Mult.</b>                            | <b>j value/Hz</b> |
|                                                                                                                                                                                                                                                                                                                                                                                                                                                                                                                                                                                                                                                                                                                                                                                                                                                                                                                                                                                                                                                                                                                                                                                                                                                                                                                                                                                | 1.09                                                                    | 3            | s                                       |                   |
|                                                                                                                                                                                                                                                                                                                                                                                                                                                                                                                                                                                                                                                                                                                                                                                                                                                                                                                                                                                                                                                                                                                                                                                                                                                                                                                                                                                | 1.12                                                                    | 3            | s                                       |                   |
|                                                                                                                                                                                                                                                                                                                                                                                                                                                                                                                                                                                                                                                                                                                                                                                                                                                                                                                                                                                                                                                                                                                                                                                                                                                                                                                                                                                | 3.21                                                                    | 1            | d                                       | 4.2               |
|                                                                                                                                                                                                                                                                                                                                                                                                                                                                                                                                                                                                                                                                                                                                                                                                                                                                                                                                                                                                                                                                                                                                                                                                                                                                                                                                                                                | 3.17                                                                    | 3            | s                                       |                   |
|                                                                                                                                                                                                                                                                                                                                                                                                                                                                                                                                                                                                                                                                                                                                                                                                                                                                                                                                                                                                                                                                                                                                                                                                                                                                                                                                                                                | 4.85                                                                    | 1            | d                                       | 4.2               |
|                                                                                                                                                                                                                                                                                                                                                                                                                                                                                                                                                                                                                                                                                                                                                                                                                                                                                                                                                                                                                                                                                                                                                                                                                                                                                                                                                                                | 7.23                                                                    | 2            | d                                       | 8.5               |
| 7.29                                                                                                                                                                                                                                                                                                                                                                                                                                                                                                                                                                                                                                                                                                                                                                                                                                                                                                                                                                                                                                                                                                                                                                                                                                                                                                                                                                           | 2                                                                       | d            | 8.5                                     |                   |
| <b><sup>13</sup>C NMR (100.6 MHz, CDCl<sub>3</sub>) δ :</b> 18.9, 22.7, 47.5, 52.1, 77.8, 127.8, 128.9, 133.4, 138.3, 177.9                                                                                                                                                                                                                                                                                                                                                                                                                                                                                                                                                                                                                                                                                                                                                                                                                                                                                                                                                                                                                                                                                                                                                                                                                                                    |                                                                         |              |                                         |                   |

| Chem. Name                                                                                                                                                                                                                                                                                                                                                                                                                                                                                                                                                                                                                                                                                                                                                                                                                                                                                                                                                                                                                                                                                                                                                                                                                                                                                                                                                                                                                                                                                | <b>Methyl 3-(2'-chloro-6'-fluorophenyl)-3-hydroxy-2,2-dimethylpropanoate (3j)</b> |              |              |                   |
|-------------------------------------------------------------------------------------------------------------------------------------------------------------------------------------------------------------------------------------------------------------------------------------------------------------------------------------------------------------------------------------------------------------------------------------------------------------------------------------------------------------------------------------------------------------------------------------------------------------------------------------------------------------------------------------------------------------------------------------------------------------------------------------------------------------------------------------------------------------------------------------------------------------------------------------------------------------------------------------------------------------------------------------------------------------------------------------------------------------------------------------------------------------------------------------------------------------------------------------------------------------------------------------------------------------------------------------------------------------------------------------------------------------------------------------------------------------------------------------------|-----------------------------------------------------------------------------------|--------------|--------------|-------------------|
| Lit. Ref.                                                                                                                                                                                                                                                                                                                                                                                                                                                                                                                                                                                                                                                                                                                                                                                                                                                                                                                                                                                                                                                                                                                                                                                                                                                                                                                                                                                                                                                                                 | ---                                                                               |              |              |                   |
| <p style="text-align: center;"> <math>\text{1j} + \text{2} \xrightarrow[\text{30 } ^\circ\text{C, 5 h}]{\text{1. Amb-F (5 mol\%)} \\ \text{water 50 mol\%} \\ \text{SolFC, 60 } ^\circ\text{C, 6 h}} \text{3j}</math> </p> <p style="text-align: center;">Mol.Wt.: 260</p>                                                                                                                                                                                                                                                                                                                                                                                                                                                                                                                                                                                                                                                                                                                                                                                                                                                                                                                                                                                                                                                                                                                                                                                                                |                                                                                   |              |              |                   |
| <p><b>METHOD:</b></p> <p>In a screw capped vial equipped with a magnetic stirrer 2-chloro-6-fluorobenzaldehyde (<b>1j</b>) (0.158 g, 1.0 mmol), methyl trimethylsilyl dimethylketene acetal (<b>2</b>) (0.638 mL, 3.0 mmol), Amb-F (0.020 g, 0.05 mmol, 2.5 mmol/g) and de-ionized H<sub>2</sub>O (0.009 mL, 0.5 mmol) were consecutively added and the resulting mixture was left under vigorous stirring at 60 °C. After 6 hours THF (2 mL) was added and the catalyst was filtered off. 20 mol% of DOWEX 50Wx8 H wet (25 mg) was added and the mixture was stirred at 30 °C for 5 h. Brine (1 mL) was then added, the solid catalyst filtered off and the organic phase was extracted with Et<sub>2</sub>O (2 x 2 mL). Organic layer was dried over sodium sulfate/potassium carbonate (2:1 mixture). Both methyl 2-methylpropanoate, coming from the hydrolysis of the excess of <b>2</b>, and solvent were removed under high vacuum at 50 °C to give methyl 3-(2'-chloro-6'-fluorophenyl)-3-hydroxy-2,2-dimethylpropanoate (<b>3j</b>) in 90% purity. <b>3j</b> <b>3k</b> was purified by silica gel flash chromatography (eluent: Petroleum ether/EtOAc, 9/1) to give pure the pure compound as a colorless oil (75% yield, 0.195 g).</p> <p>E-factor = 24.7</p> <p>[0.158 g (aldehyde) + 0.273 g (methyl trimethylsilyl dimethylketene acetal) + 0.009 g (H<sub>2</sub>O) + 1.78 g (THF) + 2.8 g (Et<sub>2</sub>O extraction 2 x 2 mL) – 0.195 g (product x yield)] / 0.195 g</p> |                                                                                   |              |              |                   |
| <b>Mol Formula</b>                                                                                                                                                                                                                                                                                                                                                                                                                                                                                                                                                                                                                                                                                                                                                                                                                                                                                                                                                                                                                                                                                                                                                                                                                                                                                                                                                                                                                                                                        | C <sub>12</sub> H <sub>14</sub> ClFO <sub>3</sub>                                 | <b>m.p.</b>  | Oil          |                   |
| <b>FT-IR (CHCl<sub>3</sub>, cm<sup>-1</sup>):</b> 3567, 2966, 1731.                                                                                                                                                                                                                                                                                                                                                                                                                                                                                                                                                                                                                                                                                                                                                                                                                                                                                                                                                                                                                                                                                                                                                                                                                                                                                                                                                                                                                       |                                                                                   |              |              |                   |
| <b>Elemental Analysis:</b> Calcd. C, 55.29; H, 5.41; Cl, 13.60; F, 7.29; found C, 55.15; H, 5.32; Cl, 13.48; F, 7.40.                                                                                                                                                                                                                                                                                                                                                                                                                                                                                                                                                                                                                                                                                                                                                                                                                                                                                                                                                                                                                                                                                                                                                                                                                                                                                                                                                                     |                                                                                   |              |              |                   |
| <b><sup>1</sup>H NMR</b><br><b>400 MHz</b><br><b>CDCl<sub>3</sub></b>                                                                                                                                                                                                                                                                                                                                                                                                                                                                                                                                                                                                                                                                                                                                                                                                                                                                                                                                                                                                                                                                                                                                                                                                                                                                                                                                                                                                                     | <b>δ value</b>                                                                    | <b>No. H</b> | <b>Mult.</b> | <b>j value/Hz</b> |
|                                                                                                                                                                                                                                                                                                                                                                                                                                                                                                                                                                                                                                                                                                                                                                                                                                                                                                                                                                                                                                                                                                                                                                                                                                                                                                                                                                                                                                                                                           | 1.17                                                                              | 3            | <i>d</i>     | 2                 |
|                                                                                                                                                                                                                                                                                                                                                                                                                                                                                                                                                                                                                                                                                                                                                                                                                                                                                                                                                                                                                                                                                                                                                                                                                                                                                                                                                                                                                                                                                           | 1.35                                                                              | 3            | <i>s</i>     |                   |
|                                                                                                                                                                                                                                                                                                                                                                                                                                                                                                                                                                                                                                                                                                                                                                                                                                                                                                                                                                                                                                                                                                                                                                                                                                                                                                                                                                                                                                                                                           | 3.61                                                                              | 1            | <i>q</i>     | 5.0               |
|                                                                                                                                                                                                                                                                                                                                                                                                                                                                                                                                                                                                                                                                                                                                                                                                                                                                                                                                                                                                                                                                                                                                                                                                                                                                                                                                                                                                                                                                                           | 3.73                                                                              | 3            | <i>s</i>     |                   |
|                                                                                                                                                                                                                                                                                                                                                                                                                                                                                                                                                                                                                                                                                                                                                                                                                                                                                                                                                                                                                                                                                                                                                                                                                                                                                                                                                                                                                                                                                           | 5.36                                                                              | 1            | <i>d</i>     | 9.9               |
|                                                                                                                                                                                                                                                                                                                                                                                                                                                                                                                                                                                                                                                                                                                                                                                                                                                                                                                                                                                                                                                                                                                                                                                                                                                                                                                                                                                                                                                                                           | 6.96                                                                              | 1            | <i>m</i>     |                   |
|                                                                                                                                                                                                                                                                                                                                                                                                                                                                                                                                                                                                                                                                                                                                                                                                                                                                                                                                                                                                                                                                                                                                                                                                                                                                                                                                                                                                                                                                                           | 7.17                                                                              | 2            | <i>m</i>     |                   |
| <b><sup>13</sup>C NMR (100.6 MHz, CDCl<sub>3</sub>) δ :</b> 20.3 (J <sub>C-F</sub> = 3.1), 24.2, 48.3, 52.1, 76.0, 115.0 (J <sub>C-F</sub> = 24.3), 125.7, 125.8 (J <sub>C-F</sub> = 3.6), 129.4 (J <sub>C-F</sub> = 10.7), 134.8 (J <sub>C-F</sub> = 8.4), 161.7 (J <sub>C-F</sub> = 248.5), 176.4.                                                                                                                                                                                                                                                                                                                                                                                                                                                                                                                                                                                                                                                                                                                                                                                                                                                                                                                                                                                                                                                                                                                                                                                      |                                                                                   |              |              |                   |



| Chem. Name                                                                                                                                                                                                                                                                                                                                                                                                                                                                                                                                                                                                                                                                                                                                                                                                                                                                                                                                                                                                                                                                                                                                                                                                                                                                                                                                                                                                                                                | Methyl 3-hydroxy-2,2-dimethyl-3-(3'-nitrophenyl)propanoate (3k) |              |              |                   |
|-----------------------------------------------------------------------------------------------------------------------------------------------------------------------------------------------------------------------------------------------------------------------------------------------------------------------------------------------------------------------------------------------------------------------------------------------------------------------------------------------------------------------------------------------------------------------------------------------------------------------------------------------------------------------------------------------------------------------------------------------------------------------------------------------------------------------------------------------------------------------------------------------------------------------------------------------------------------------------------------------------------------------------------------------------------------------------------------------------------------------------------------------------------------------------------------------------------------------------------------------------------------------------------------------------------------------------------------------------------------------------------------------------------------------------------------------------------|-----------------------------------------------------------------|--------------|--------------|-------------------|
| Lit. Ref.                                                                                                                                                                                                                                                                                                                                                                                                                                                                                                                                                                                                                                                                                                                                                                                                                                                                                                                                                                                                                                                                                                                                                                                                                                                                                                                                                                                                                                                 | Org. Biomol. Chem. 2004, 2, 3401                                |              |              |                   |
| <p style="text-align: center;"><b>1k</b> + <b>2</b> <math>\xrightarrow[30\text{ }^\circ\text{C, 5 h}]{1. \text{ Amb-F (5 mol\%)}<br/>water 50 mol\%<br/>SolFC, 60\text{ }^\circ\text{C, 6 h}}</math> <b>3k</b><br/>Mol.Wt.: 253</p>                                                                                                                                                                                                                                                                                                                                                                                                                                                                                                                                                                                                                                                                                                                                                                                                                                                                                                                                                                                                                                                                                                                                                                                                                       |                                                                 |              |              |                   |
| <p><b>METHOD:</b><br/> In a screw capped vial equipped with a magnetic stirrer 3-nitrobenzaldehyde (<b>1k</b>) (0.151g, 1.0 mmol), methyl trimethylsilyl dimethylketene acetal <b>2</b>, (0.638 mL, 3.0 mmol), Amb-F(0.020 g, 0.05 mmol, 2.5 mmol/g) and distilled H<sub>2</sub>O (0.009 mL, 0.5 mmol) were consecutively added and the resulting mixture was left under vigorous stirring at 60 °C. After 6 hours THF (2 mL) was added and the catalyst was filtered off. 20 mol% of DOWEX 50Wx8 H wet (25 mg) was added and the mixture was stirred at 30 °C for 5 h. Brine (1 mL) was then added, the solid catalyst filtered off and the organic phase was extracted with Et<sub>2</sub>O (2 x 2 mL). Organic layer was dried over sodium sulfate/potassium carbonate (2:1 mixture). Both methyl 2-methylpropionate, coming from the hydrolysis of the excess of <b>2</b>, and solvent were removed under high vacuum at 50 °C to give 95% pure methyl 3-hydroxy-2,2-dimethyl-3-(3'-nitrophenyl)propanoate (<b>3k</b>) in 95% purity. <b>3k</b> was purified by silica gel flash chromatography (eluent: Petroleum ether/EtOAc, 9/1) to give pure the pure compound as a colorless oil (88% yield, 0.222 g).<br/> E-factor = 21.5<br/> [0.151 g (aldehyde) + 0.273 g (methyl trimethylsilyl dimethylketene acetal) + 0.009 g (H<sub>2</sub>O) + 1.78 g (THF) + 2.8 g (Et<sub>2</sub>O extraction 2 x 2 mL) – 0.223 g (product x yield)] / 0.223 g</p> |                                                                 |              |              |                   |
| <b>Mol Formula</b>                                                                                                                                                                                                                                                                                                                                                                                                                                                                                                                                                                                                                                                                                                                                                                                                                                                                                                                                                                                                                                                                                                                                                                                                                                                                                                                                                                                                                                        | C <sub>12</sub> H <sub>15</sub> NO <sub>5</sub>                 | <b>m.p.</b>  | Oil          |                   |
| <b>FT-IR (CHCl<sub>3</sub>, cm<sup>-1</sup>):</b> 3599, 2986, 1711.                                                                                                                                                                                                                                                                                                                                                                                                                                                                                                                                                                                                                                                                                                                                                                                                                                                                                                                                                                                                                                                                                                                                                                                                                                                                                                                                                                                       |                                                                 |              |              |                   |
| <b>Elemental Analysis:</b> Calcd. C, 56.91; H, 5.97; N, 6.53; found C, 60.04; H, 5.80; N, 6.42.                                                                                                                                                                                                                                                                                                                                                                                                                                                                                                                                                                                                                                                                                                                                                                                                                                                                                                                                                                                                                                                                                                                                                                                                                                                                                                                                                           |                                                                 |              |              |                   |
| <b><sup>1</sup>H NMR</b><br><b>400 MHz</b><br><b>CDCl<sub>3</sub></b>                                                                                                                                                                                                                                                                                                                                                                                                                                                                                                                                                                                                                                                                                                                                                                                                                                                                                                                                                                                                                                                                                                                                                                                                                                                                                                                                                                                     | <b>δ value</b>                                                  | <b>No. H</b> | <b>Mult.</b> | <b>j value/Hz</b> |
|                                                                                                                                                                                                                                                                                                                                                                                                                                                                                                                                                                                                                                                                                                                                                                                                                                                                                                                                                                                                                                                                                                                                                                                                                                                                                                                                                                                                                                                           | 1.11                                                            | 3            | <i>m</i>     |                   |
|                                                                                                                                                                                                                                                                                                                                                                                                                                                                                                                                                                                                                                                                                                                                                                                                                                                                                                                                                                                                                                                                                                                                                                                                                                                                                                                                                                                                                                                           | 1.38                                                            | 3            | <i>m</i>     |                   |
|                                                                                                                                                                                                                                                                                                                                                                                                                                                                                                                                                                                                                                                                                                                                                                                                                                                                                                                                                                                                                                                                                                                                                                                                                                                                                                                                                                                                                                                           | 3.47                                                            | 1            | <i>bs</i>    |                   |
|                                                                                                                                                                                                                                                                                                                                                                                                                                                                                                                                                                                                                                                                                                                                                                                                                                                                                                                                                                                                                                                                                                                                                                                                                                                                                                                                                                                                                                                           | 3.72                                                            | 3            | <i>s</i>     |                   |
|                                                                                                                                                                                                                                                                                                                                                                                                                                                                                                                                                                                                                                                                                                                                                                                                                                                                                                                                                                                                                                                                                                                                                                                                                                                                                                                                                                                                                                                           | 4.99                                                            | 1            | <i>s</i>     |                   |
|                                                                                                                                                                                                                                                                                                                                                                                                                                                                                                                                                                                                                                                                                                                                                                                                                                                                                                                                                                                                                                                                                                                                                                                                                                                                                                                                                                                                                                                           | 7.50                                                            | 1            | <i>t</i>     | 7.9               |
|                                                                                                                                                                                                                                                                                                                                                                                                                                                                                                                                                                                                                                                                                                                                                                                                                                                                                                                                                                                                                                                                                                                                                                                                                                                                                                                                                                                                                                                           | 7.63                                                            | 1            | <i>d</i>     | 7.7               |
|                                                                                                                                                                                                                                                                                                                                                                                                                                                                                                                                                                                                                                                                                                                                                                                                                                                                                                                                                                                                                                                                                                                                                                                                                                                                                                                                                                                                                                                           | 8.12                                                            | 1            | <i>d</i>     | 8.3               |
| 8.16                                                                                                                                                                                                                                                                                                                                                                                                                                                                                                                                                                                                                                                                                                                                                                                                                                                                                                                                                                                                                                                                                                                                                                                                                                                                                                                                                                                                                                                      | 1                                                               | <i>m</i>     |              |                   |
| <b><sup>13</sup>C NMR (100.6 MHz, CDCl<sub>3</sub>) δ :</b> 19.2, 22.4, 47.6, 52.2, 77.5, 122.4, 122.6, 128.6, 133.6, 142.0, 147.8, 177.5.                                                                                                                                                                                                                                                                                                                                                                                                                                                                                                                                                                                                                                                                                                                                                                                                                                                                                                                                                                                                                                                                                                                                                                                                                                                                                                                |                                                                 |              |              |                   |



| Chem. Name                                                                                                                                                                                                                                                                                                                                                                                                                                                                                                                                                                                                                                                                                                                                                                                                                                                                                                                                                                                                                                                                                                                                                                                                                                                                                                                               | Methyl 3-hydroxy-2,2-dimethyl-3'-pyridin-2'-ylpropanoate ( <b>3I</b> ) |              |              |                   |
|------------------------------------------------------------------------------------------------------------------------------------------------------------------------------------------------------------------------------------------------------------------------------------------------------------------------------------------------------------------------------------------------------------------------------------------------------------------------------------------------------------------------------------------------------------------------------------------------------------------------------------------------------------------------------------------------------------------------------------------------------------------------------------------------------------------------------------------------------------------------------------------------------------------------------------------------------------------------------------------------------------------------------------------------------------------------------------------------------------------------------------------------------------------------------------------------------------------------------------------------------------------------------------------------------------------------------------------|------------------------------------------------------------------------|--------------|--------------|-------------------|
| Lit. Ref.                                                                                                                                                                                                                                                                                                                                                                                                                                                                                                                                                                                                                                                                                                                                                                                                                                                                                                                                                                                                                                                                                                                                                                                                                                                                                                                                | Tetrahedron, 2000, 56, 7309.                                           |              |              |                   |
| <p style="text-align: center;"><b>1I</b> + <b>2</b> <math>\xrightarrow[\text{30 } ^\circ\text{C, 5 h}]{\text{1. Amb-F (5 mol\%), water 50 mol\%, SolFC, 60 } ^\circ\text{C, 6 h}}</math> <b>3I</b><br/>Mol.Wt.: 209</p>                                                                                                                                                                                                                                                                                                                                                                                                                                                                                                                                                                                                                                                                                                                                                                                                                                                                                                                                                                                                                                                                                                                  |                                                                        |              |              |                   |
| <p><b>METHOD:</b><br/>           In a screw capped vial equipped with a magnetic stirrer pyridine-2-carbaldehyde (<b>1I</b>) (0.107 g, 1.0mmol), methyl trimethylsilyl dimethylketene acetal <b>2</b>, (0.638 mL, 3.0 mmol), Amb-F(0.020 g, 0.05 mmol, 2.5 mmol/g) and distilled H<sub>2</sub>O (0.009 mL, 0.5 mmol) were consecutively added and the resulting mixture was left under vigorous stirring at 60 °C. After 6 hours THF (2 mL) was added and the catalyst was filtered off. 20 mol% of DOWEX 50Wx8 H wet (25 mg) was added and the mixture was stirred at 30 °C for 5 h. Brine (1 mL) was then added, the solid catalyst filtered off and the organic phase was extracted with Et<sub>2</sub>O (2 x 2 mL). Organic layer was dried over sodium sulfate/potassium carbonate (2:1 mixture). Both methyl 2-methylpropanoate, coming from the hydrolysis of the excess of <b>2</b>, and solvent were removed under high vacuum at 50 °C to give pure methyl 3-hydroxy-2,2-dimethyl-3'-pyridin-2'-ylpropanoate (<b>3I</b>) as a colorless oil (93% yield, 0.194 g).<br/>           E-factor = 24.6<br/>           [0.107 g (aldehyde) + 0.273 g (methyl trimethylsilyl dimethylketene acetal) + 0.009 g (H<sub>2</sub>O) + 1.78 g (THF) + 2.8 g (Et<sub>2</sub>O extraction 2 x 2 mL) – 0.194 g (product x yield)] / 0.194 g</p> |                                                                        |              |              |                   |
| <b>Mol Formula</b>                                                                                                                                                                                                                                                                                                                                                                                                                                                                                                                                                                                                                                                                                                                                                                                                                                                                                                                                                                                                                                                                                                                                                                                                                                                                                                                       | C <sub>11</sub> H <sub>15</sub> NO <sub>3</sub>                        | <b>m.p.</b>  | Oil          |                   |
| <b>FT-IR (CHCl<sub>3</sub>, cm<sup>-1</sup>):</b> 3017, 2986, 1716.                                                                                                                                                                                                                                                                                                                                                                                                                                                                                                                                                                                                                                                                                                                                                                                                                                                                                                                                                                                                                                                                                                                                                                                                                                                                      |                                                                        |              |              |                   |
| <b>Elemental Analysis:</b> Calcd. C, 63.14; H, 7.23; N, 6.69; found C, 63.21; H, 7.15; N, 6.72.                                                                                                                                                                                                                                                                                                                                                                                                                                                                                                                                                                                                                                                                                                                                                                                                                                                                                                                                                                                                                                                                                                                                                                                                                                          |                                                                        |              |              |                   |
| <b><sup>1</sup>H NMR</b><br><b>400 MHz</b><br><b>CDCl<sub>3</sub></b>                                                                                                                                                                                                                                                                                                                                                                                                                                                                                                                                                                                                                                                                                                                                                                                                                                                                                                                                                                                                                                                                                                                                                                                                                                                                    | <b>δ value</b>                                                         | <b>No. H</b> | <b>Mult.</b> | <b>j value/Hz</b> |
|                                                                                                                                                                                                                                                                                                                                                                                                                                                                                                                                                                                                                                                                                                                                                                                                                                                                                                                                                                                                                                                                                                                                                                                                                                                                                                                                          | 1.06                                                                   | 3            | s            |                   |
|                                                                                                                                                                                                                                                                                                                                                                                                                                                                                                                                                                                                                                                                                                                                                                                                                                                                                                                                                                                                                                                                                                                                                                                                                                                                                                                                          | 1.14                                                                   | 3            | s            |                   |
|                                                                                                                                                                                                                                                                                                                                                                                                                                                                                                                                                                                                                                                                                                                                                                                                                                                                                                                                                                                                                                                                                                                                                                                                                                                                                                                                          | 3.69                                                                   | 3            | s            |                   |
|                                                                                                                                                                                                                                                                                                                                                                                                                                                                                                                                                                                                                                                                                                                                                                                                                                                                                                                                                                                                                                                                                                                                                                                                                                                                                                                                          | 4.65                                                                   | 1            | d            | 6.9               |
|                                                                                                                                                                                                                                                                                                                                                                                                                                                                                                                                                                                                                                                                                                                                                                                                                                                                                                                                                                                                                                                                                                                                                                                                                                                                                                                                          | 4.92                                                                   | 1            | d            | 6.4               |
|                                                                                                                                                                                                                                                                                                                                                                                                                                                                                                                                                                                                                                                                                                                                                                                                                                                                                                                                                                                                                                                                                                                                                                                                                                                                                                                                          | 7.17                                                                   | 2            | m            |                   |
|                                                                                                                                                                                                                                                                                                                                                                                                                                                                                                                                                                                                                                                                                                                                                                                                                                                                                                                                                                                                                                                                                                                                                                                                                                                                                                                                          | 7.62                                                                   | 1            | t            | 7.7               |
|                                                                                                                                                                                                                                                                                                                                                                                                                                                                                                                                                                                                                                                                                                                                                                                                                                                                                                                                                                                                                                                                                                                                                                                                                                                                                                                                          | 8.51                                                                   | 1            | d            | 4.6               |
| <b><sup>13</sup>C NMR (100.6 MHz, CDCl<sub>3</sub>) δ :</b> 20.7, (one carbon is missing) 48.3, 51.8, 76.9, 122.0, 122.7, 136.0, 148.0, 158.3, 177.0.                                                                                                                                                                                                                                                                                                                                                                                                                                                                                                                                                                                                                                                                                                                                                                                                                                                                                                                                                                                                                                                                                                                                                                                    |                                                                        |              |              |                   |

|                   |                                                                                                               |
|-------------------|---------------------------------------------------------------------------------------------------------------|
| <b>Chem. Name</b> | <b>Methyl 3-(4'-cyanophenyl)-3-((4'-cyanophenyl)[(trimethylsilyl)oxy]methoxy)-2,2-dimethylpropanoate (6h)</b> |
|-------------------|---------------------------------------------------------------------------------------------------------------|

|                  |     |
|------------------|-----|
| <b>Lit. Ref.</b> | --- |
|------------------|-----|

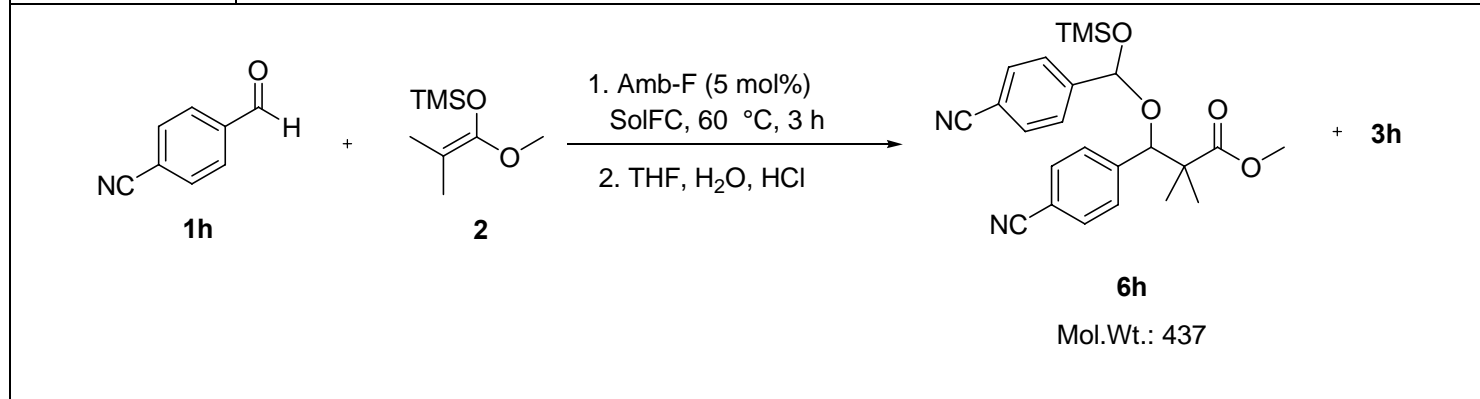

**METHOD:**

In a screw capped vial equipped with a magnetic stirrer 4-cyanobenzaldehyde (**1h**) (0.131 g, 1.0 mmol), methyl trimethylsilyl dimethylketene acetal **2**, (0.319 mL, 1.5 mmol) and Amb-F (0.020 g, 0.05 mmol, 2.5 mmol/g) were consecutively added and the resulting mixture was left under vigorous stirring at 60 °C. After 3 hours the crude mixture was diluted with Petroleum ether, the catalyst was filtered off and **6h** purified by column chromatography on neutral alumina (eluent: Petroleum ether/EtOAc, 95/5). **6h** was obtained as a diastereomeric mixture.(1:0.78).

|                    |                                                                  |             |     |
|--------------------|------------------------------------------------------------------|-------------|-----|
| <b>Mol Formula</b> | C <sub>24</sub> H <sub>28</sub> N <sub>2</sub> O <sub>4</sub> Si | <b>m.p.</b> | Oil |
|--------------------|------------------------------------------------------------------|-------------|-----|

**FT-IR (CHCl<sub>3</sub>, cm<sup>-1</sup>):** 3015, 2955, 2232, 1713.

**Elemental Analysis:** Calcd. C, 66.03; H, 6.46; N, 6.42; Si, 6.43 found C, 66.20; H, 6.28; N,6.25; Si, 6.58.

| <sup>1</sup> H NMR<br>400 MHz<br>CDCl <sub>3</sub><br>major<br>diastereoisomer | δ value | No. H | Mult. | j value/Hz |
|--------------------------------------------------------------------------------|---------|-------|-------|------------|
|                                                                                | -0.18   | 9     | s     |            |
|                                                                                | 0.97    | 3     | s     |            |
|                                                                                | 1.05    | 3     | s     |            |
|                                                                                | 3.60    | 3     | s     |            |
|                                                                                | 4.86    | 1     | s     |            |
|                                                                                | 5.69    | 1     | s     |            |

|                                  |       |   |   |  |
|----------------------------------|-------|---|---|--|
| <b>minor<br/>diastereoisomer</b> | -0.12 | 9 | s |  |
|                                  | 1.00  | 3 | s |  |
|                                  | 1.15  | 3 | s |  |
|                                  | 3.66  | 3 | s |  |
|                                  | 5.09  | 1 | s |  |
|                                  | 5.33  | 1 | s |  |

**<sup>13</sup>C NMR (100.6 MHz, CDCl<sub>3</sub>) δ :** (major diastereoisomer) -0.2, 18.7, 22.2, 48.1, 84.0, 98.3  
(minor diastereoisomer) -0.03, 20.4, 20.9, 47.7, 80.1, 93.7

**Copies of  $^1\text{H}$  NMR and  $^{13}\text{C}$  NMR spectra directly converted to PDF files from Bruker Top Spin software**

Methyl 3-(2',4'-dimethoxyphenyl)-3-hydroxy-2,2-dimethylpropanoate (3a)

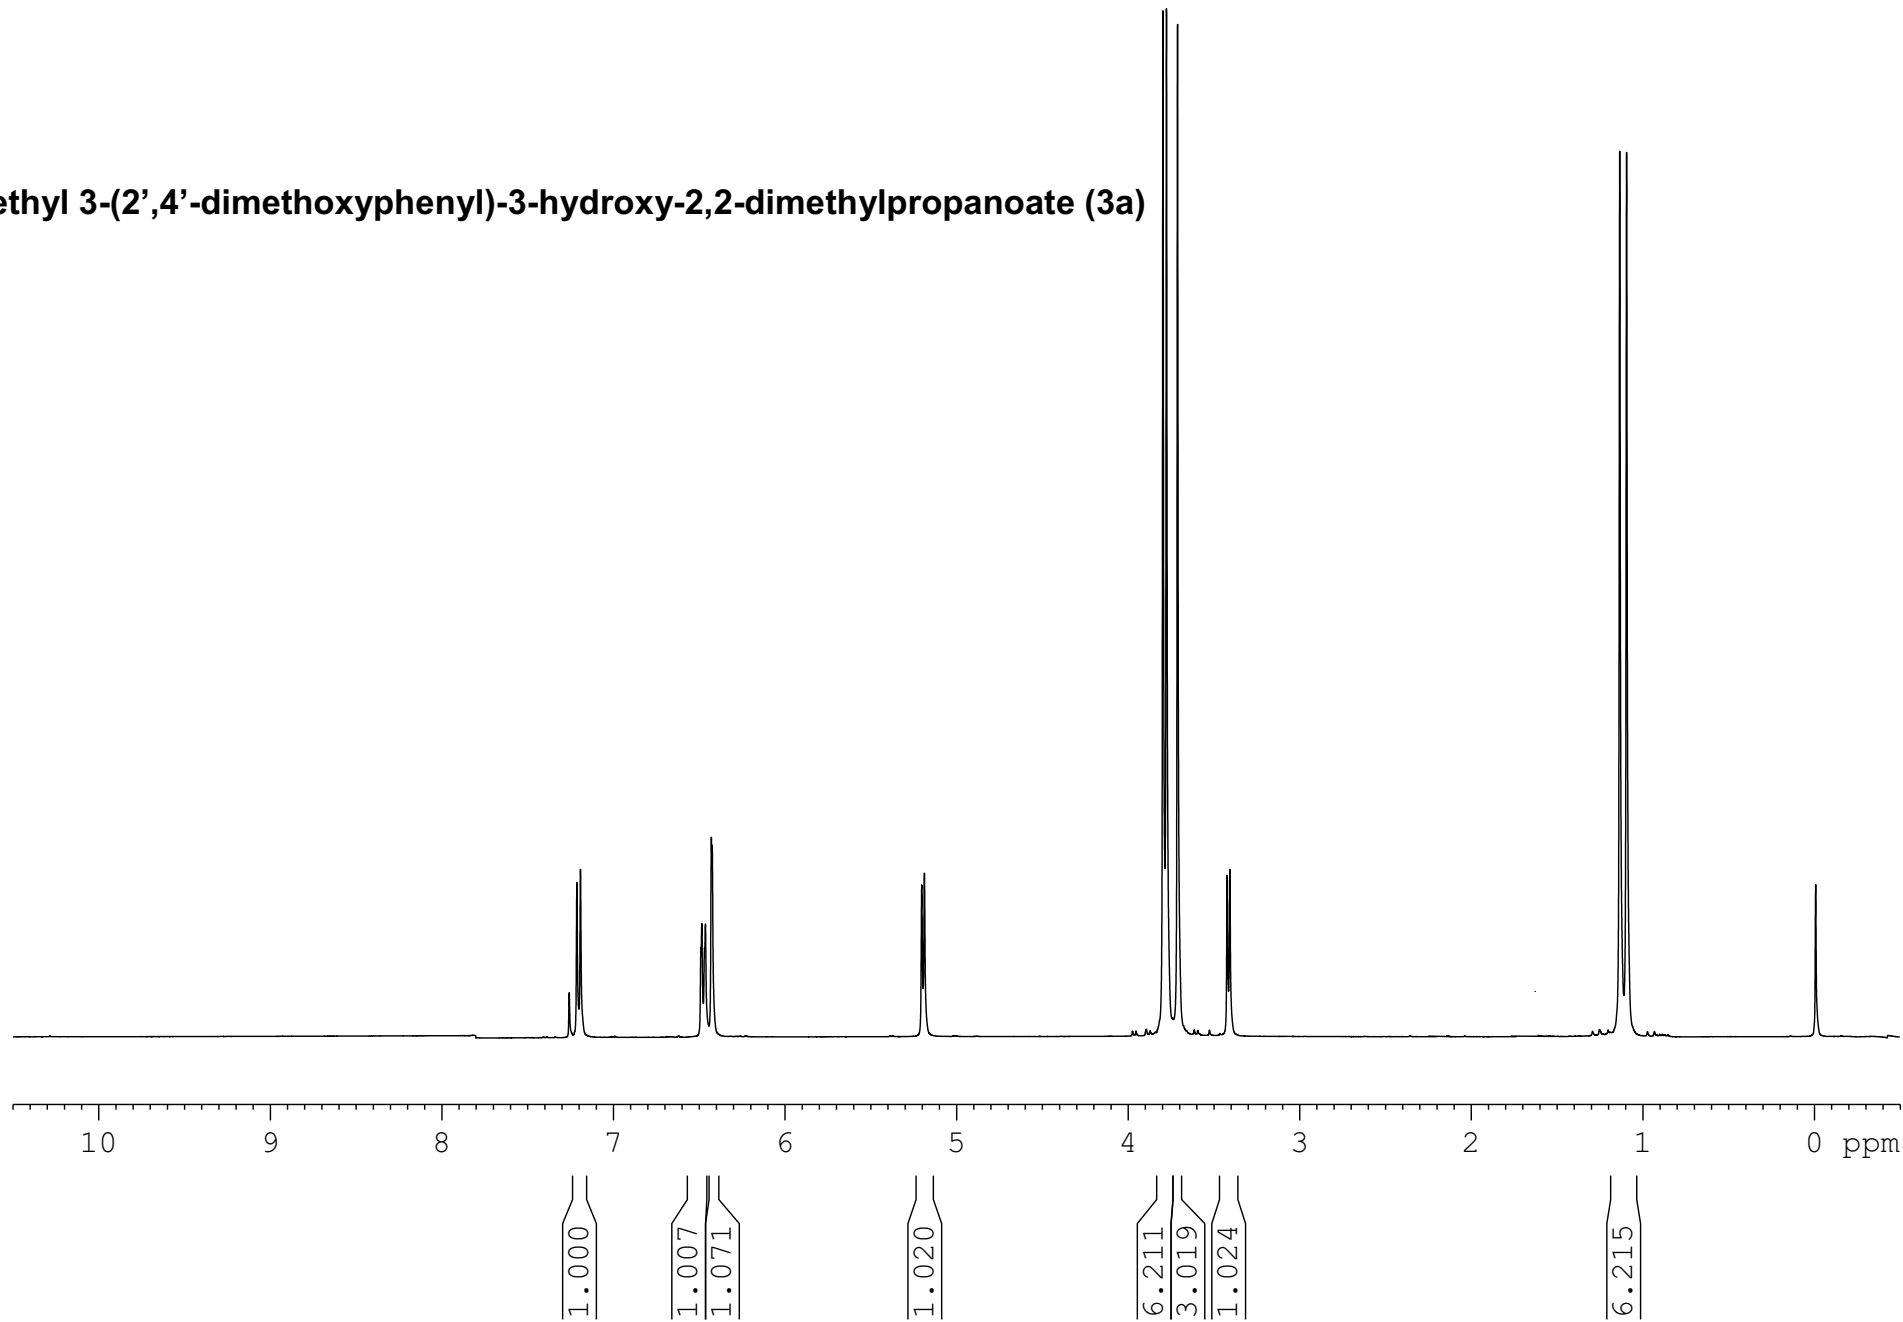

**Methyl 3-(2',4'-dimethoxyphenyl)-3-hydroxy-2,2-dimethylpropanoate (3a)**

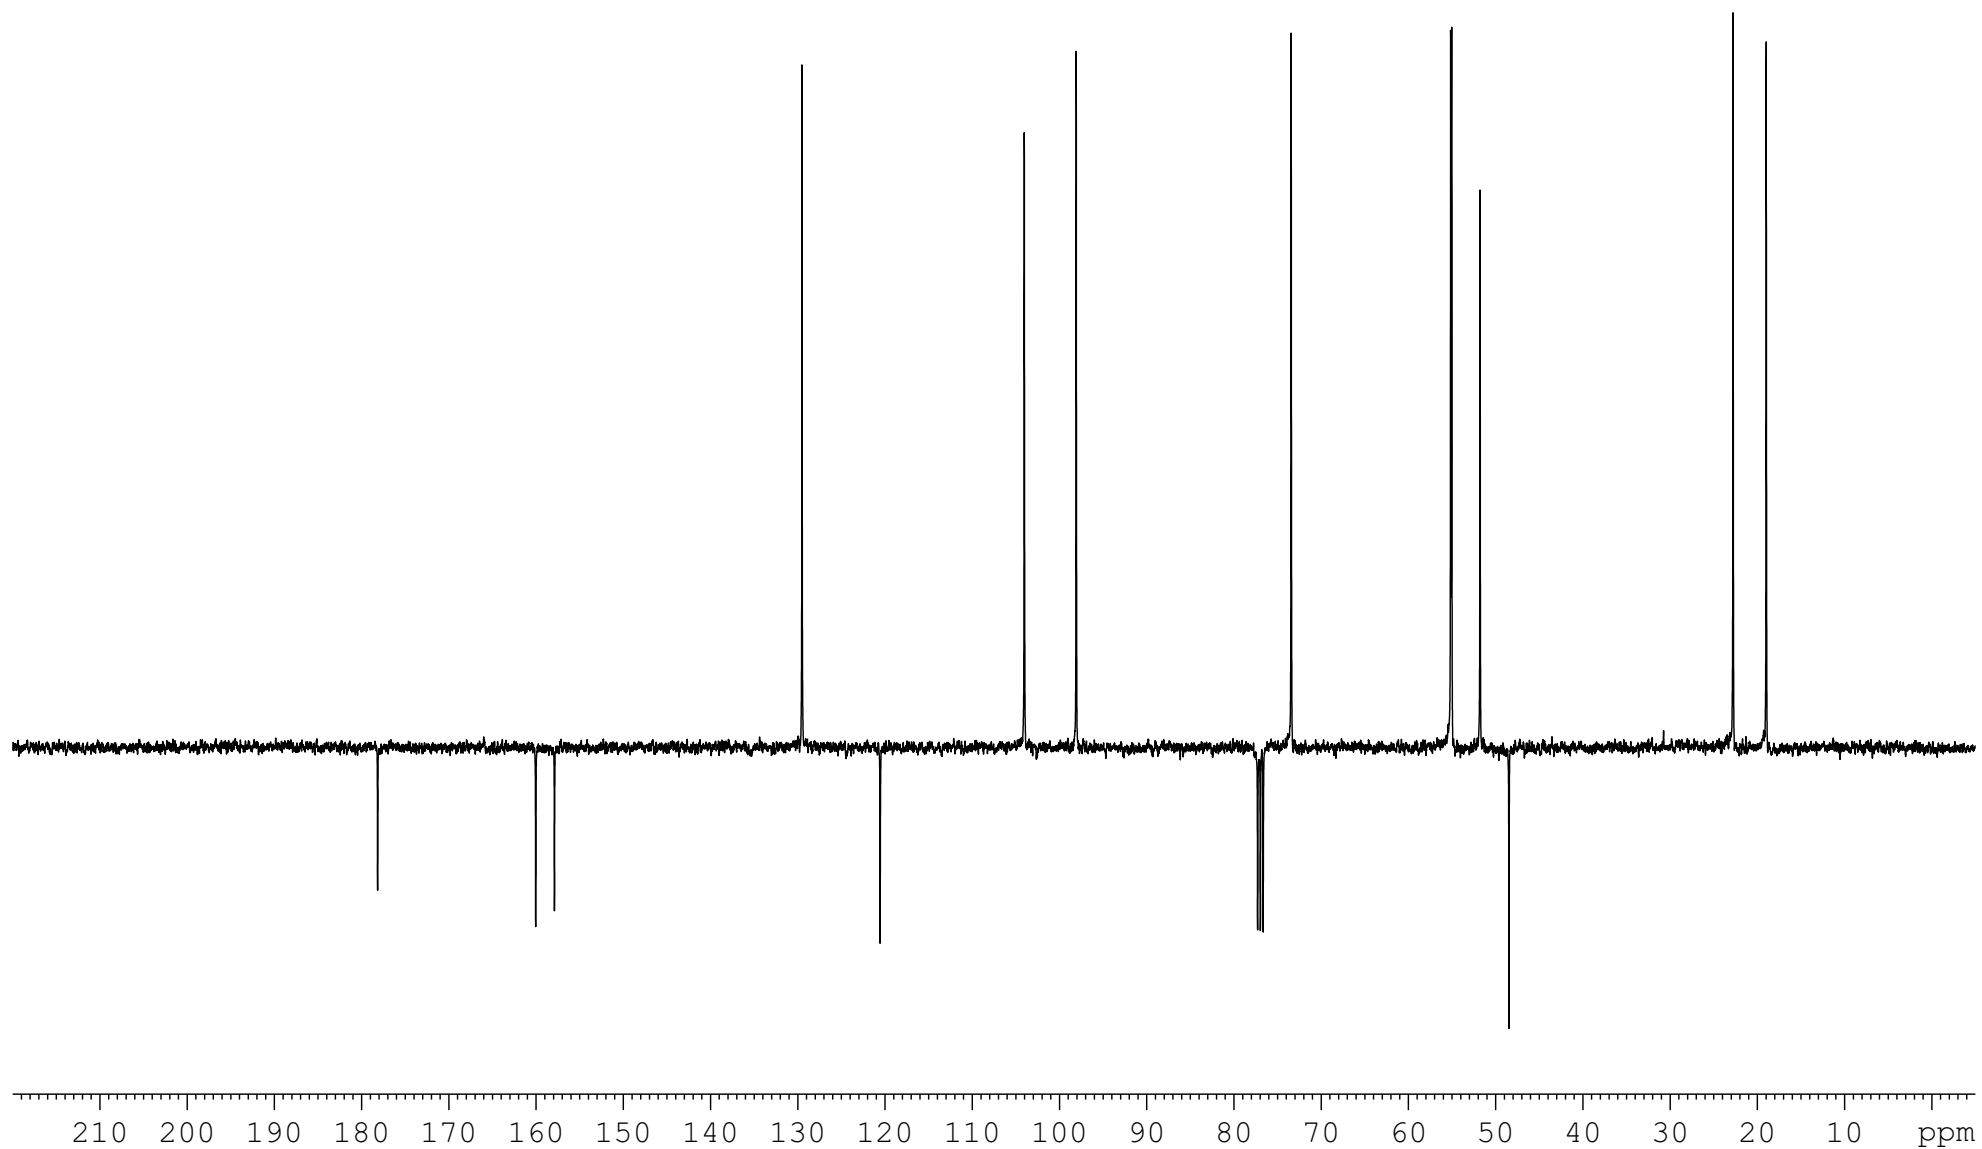

**Methyl 3-hydroxy-2,2-dimethyl-3-phenylpropanoate (3b)**

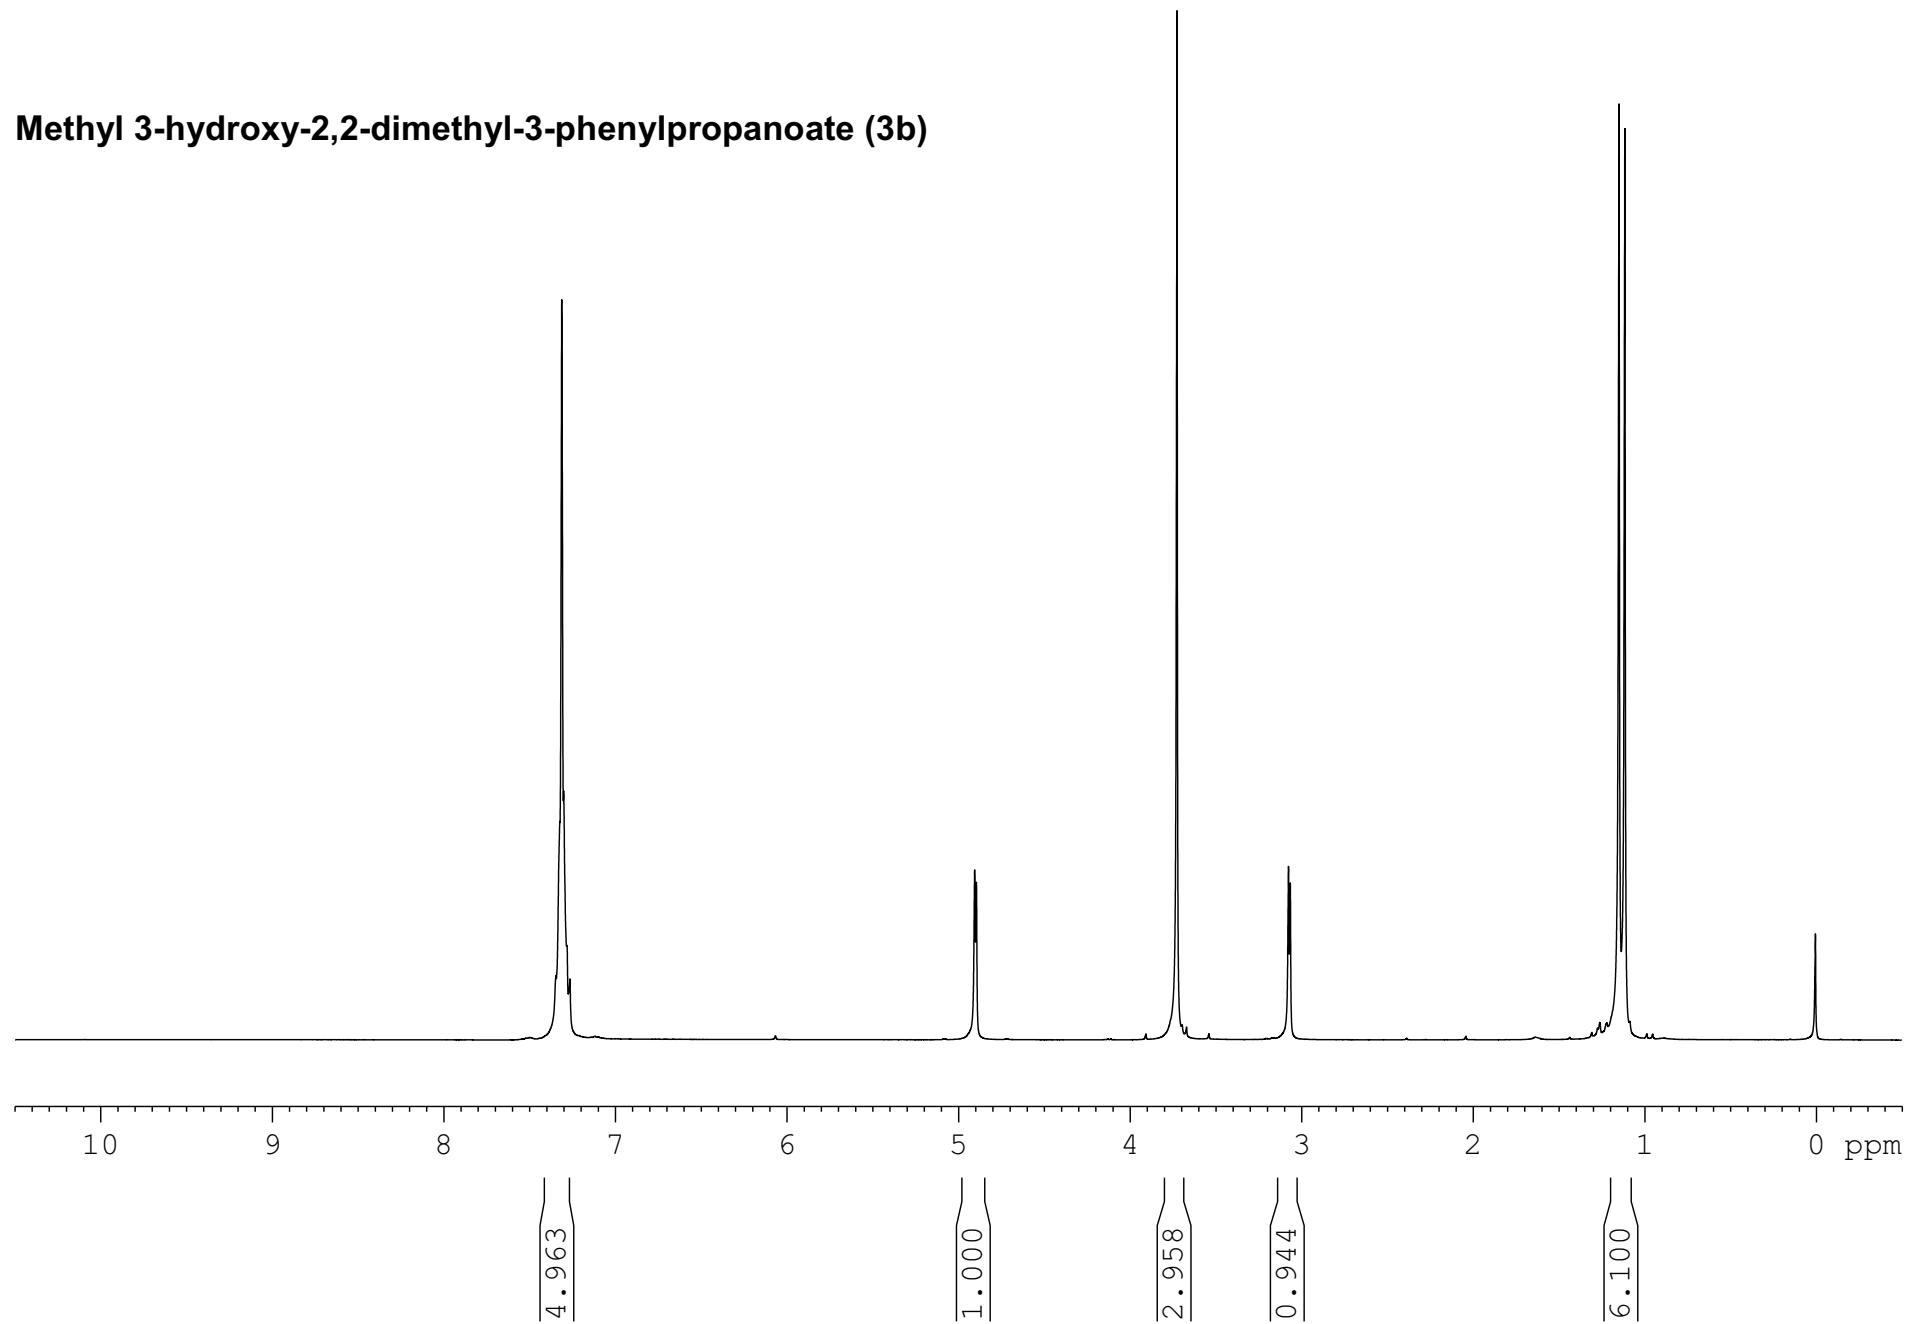

**Methyl 3-hydroxy-2,2-dimethyl-3-phenylpropanoate (3b)**

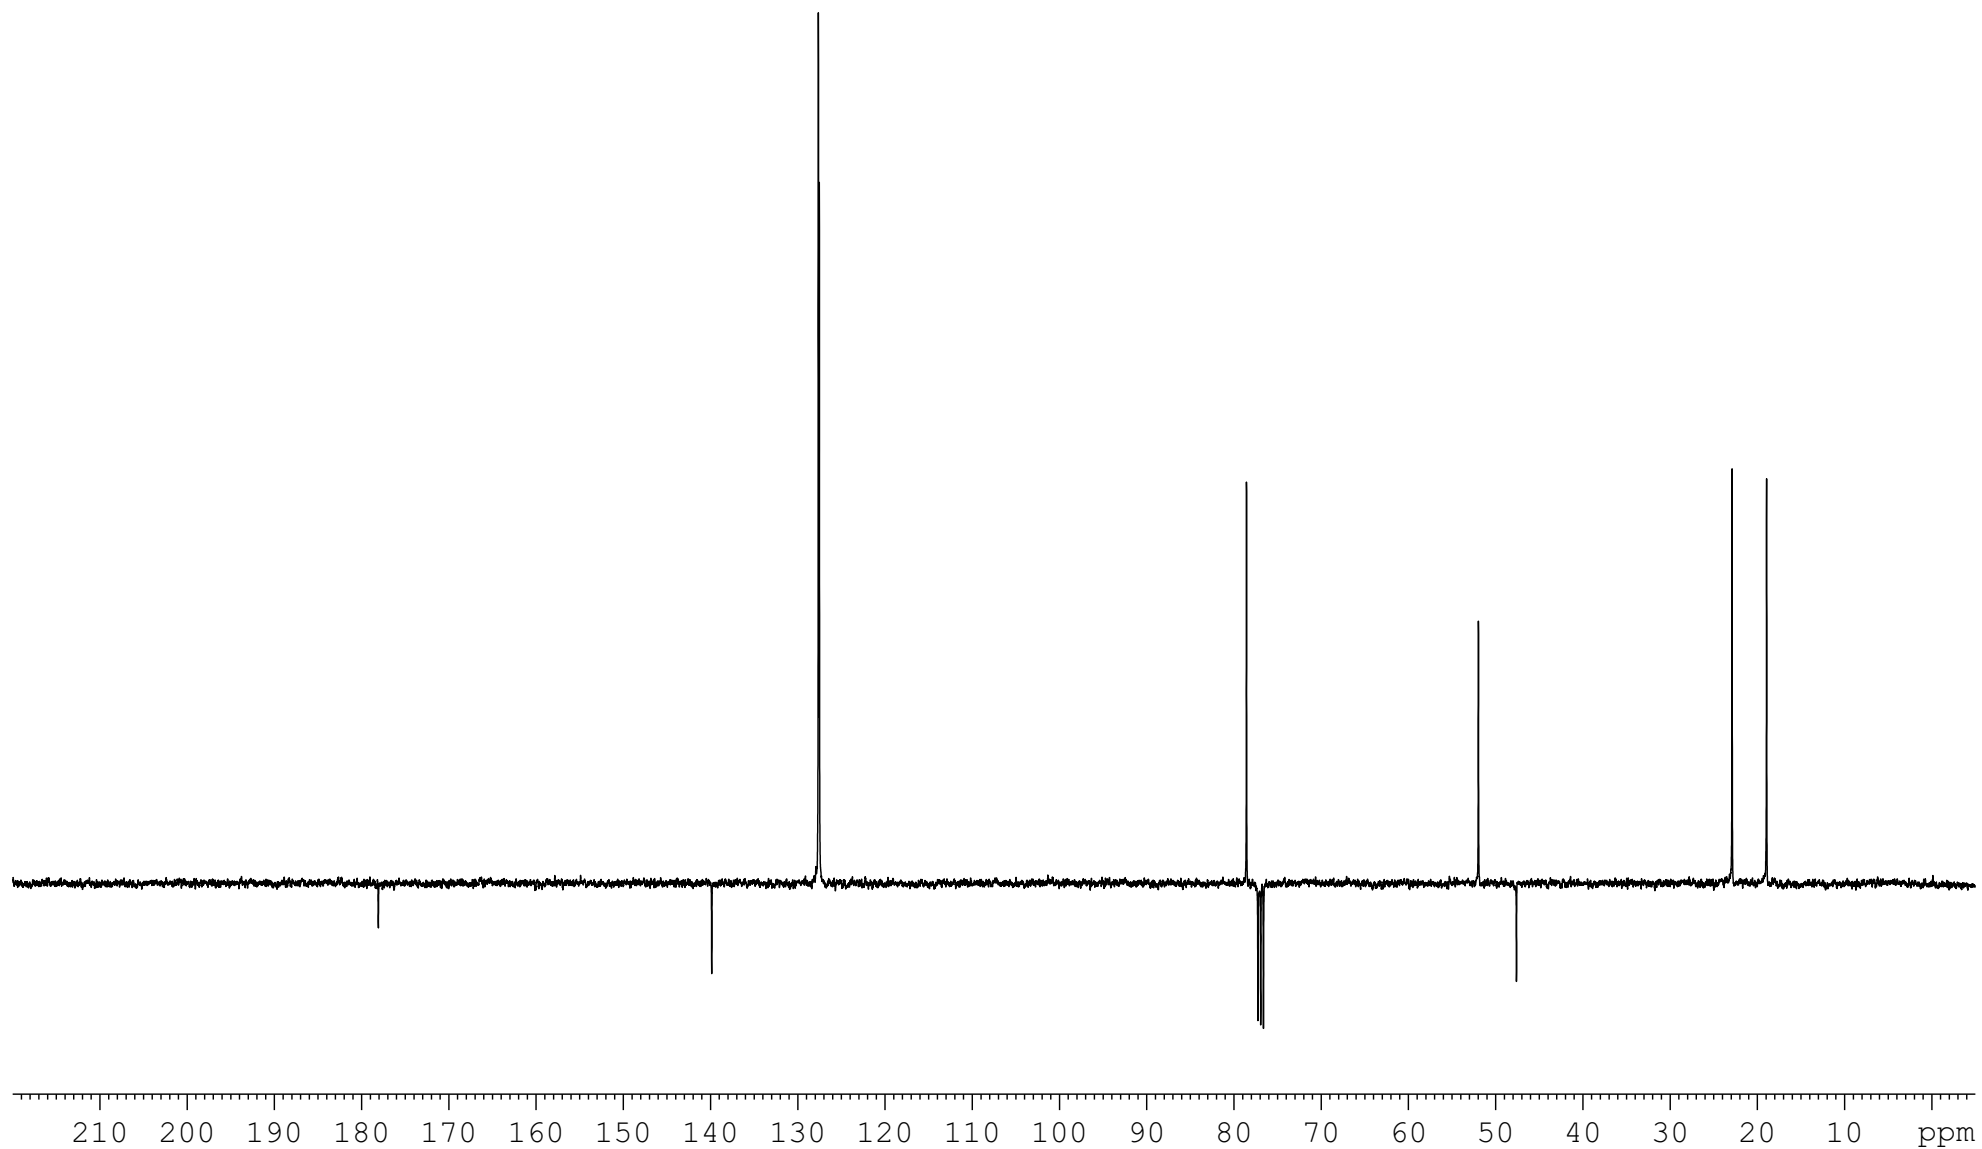

**Methyl 3-hydroxy-3-(3'-methoxyphenyl)-2,2-dimethylpropanoate (3c)**

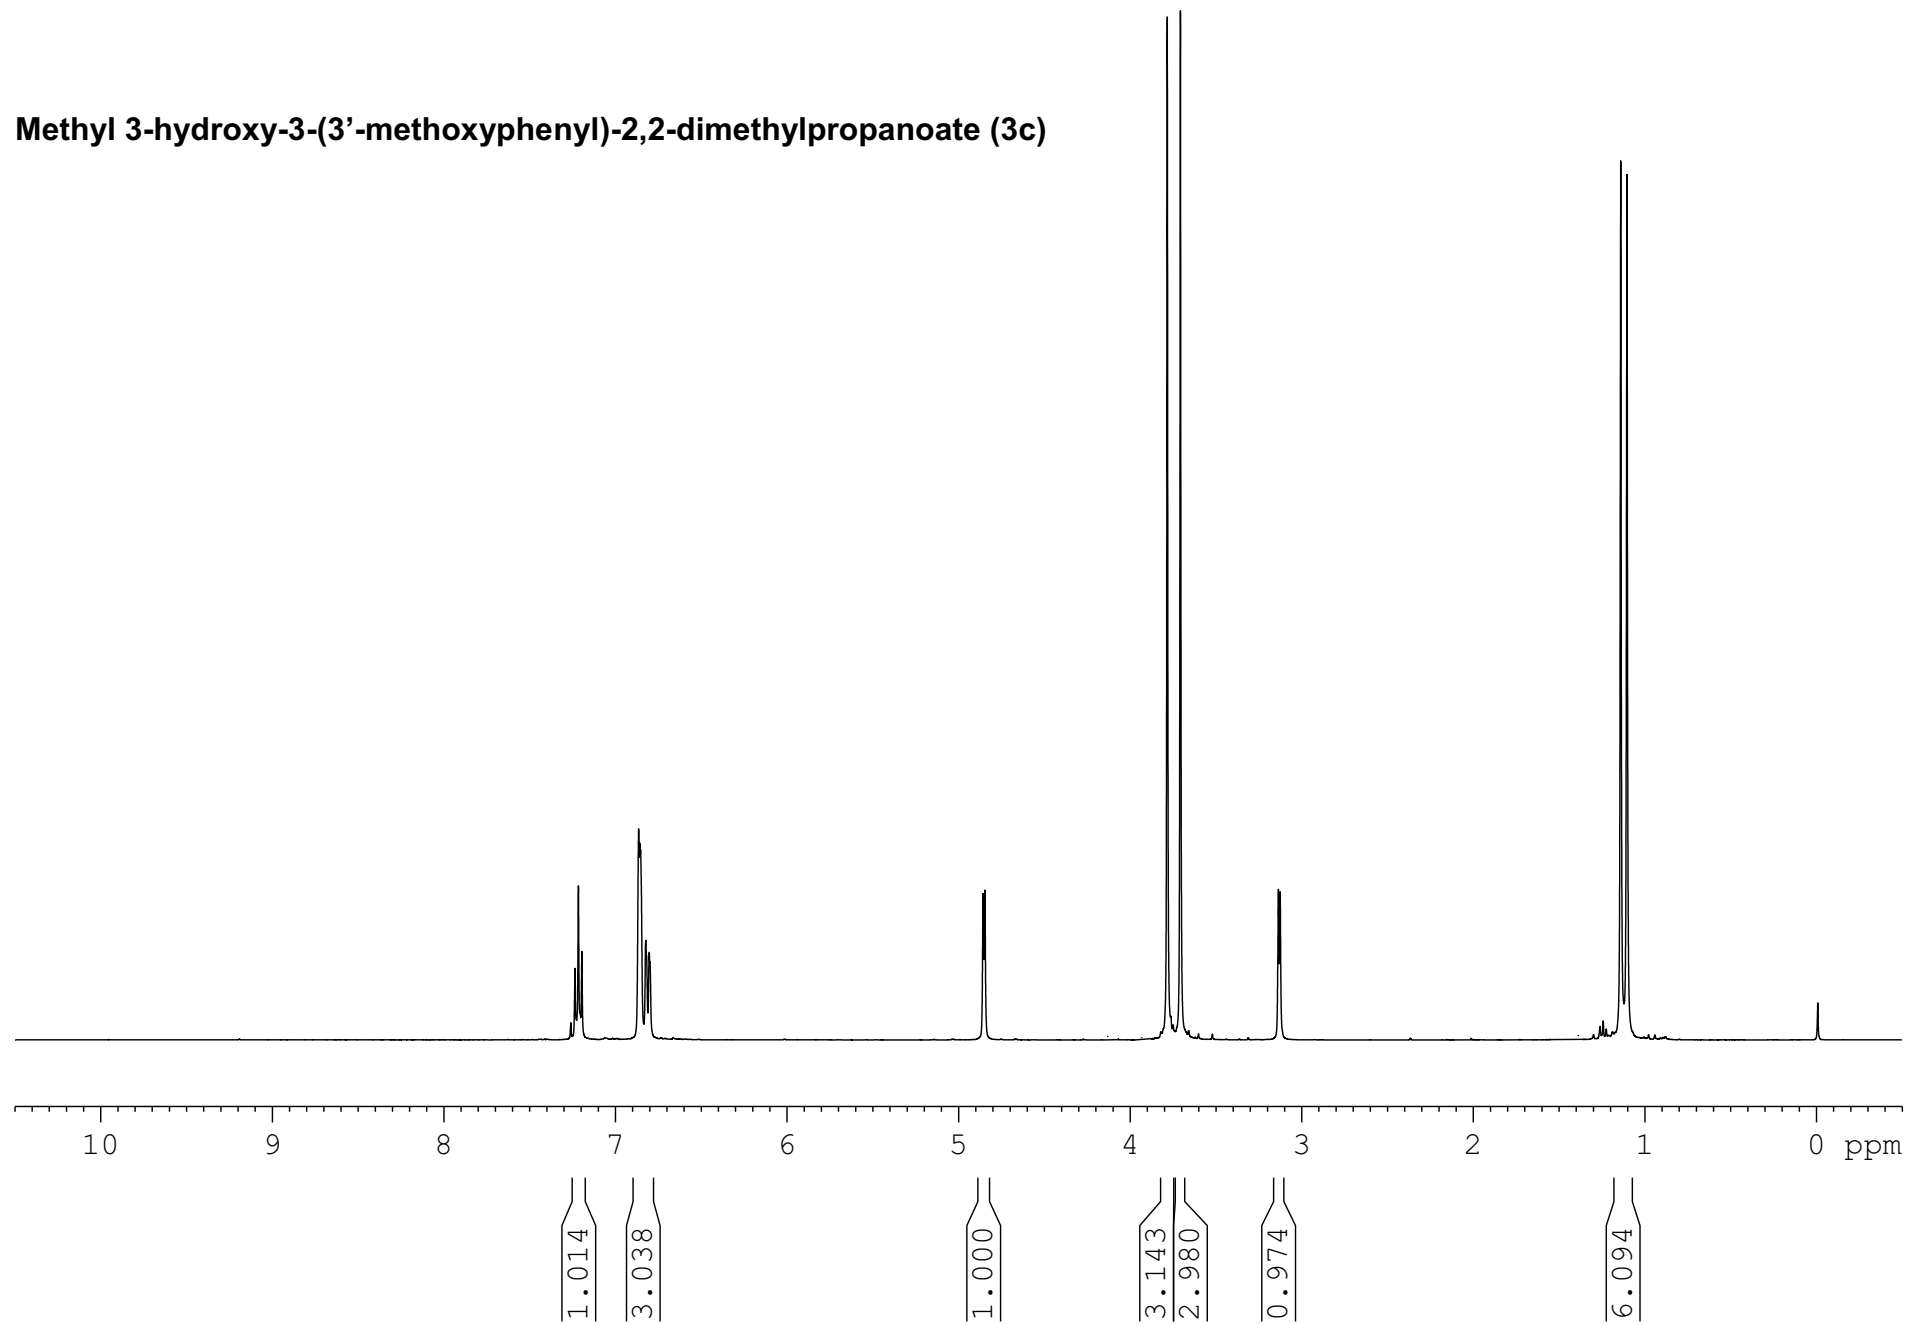



**Methyl 3-hydroxy-3-(3'-methoxyphenyl)-2,2-dimethylpropanoate (3c)**

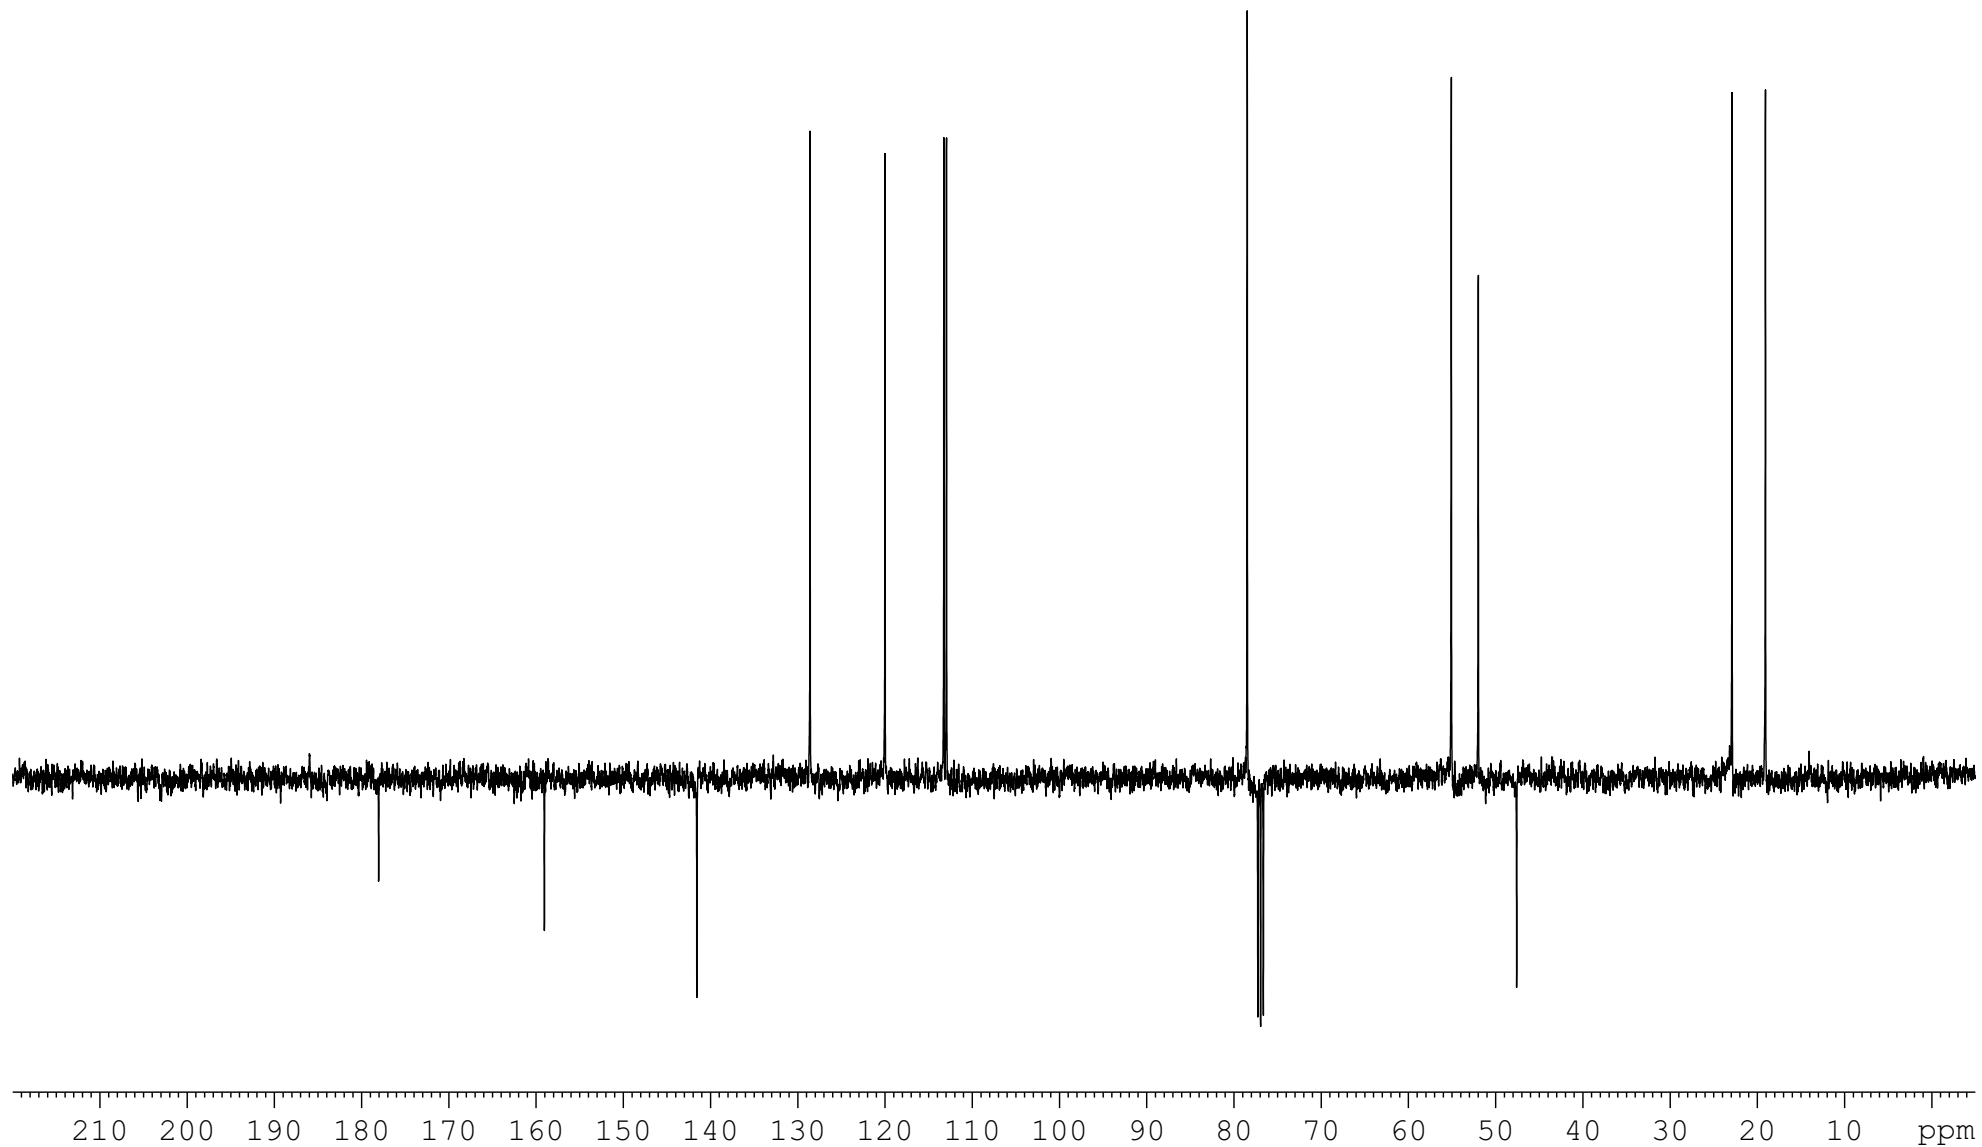

**Methyl 3-hydroxy-2,2-dimethyl-3-[4'-(methylthio)phenyl]propanoate (3d)**

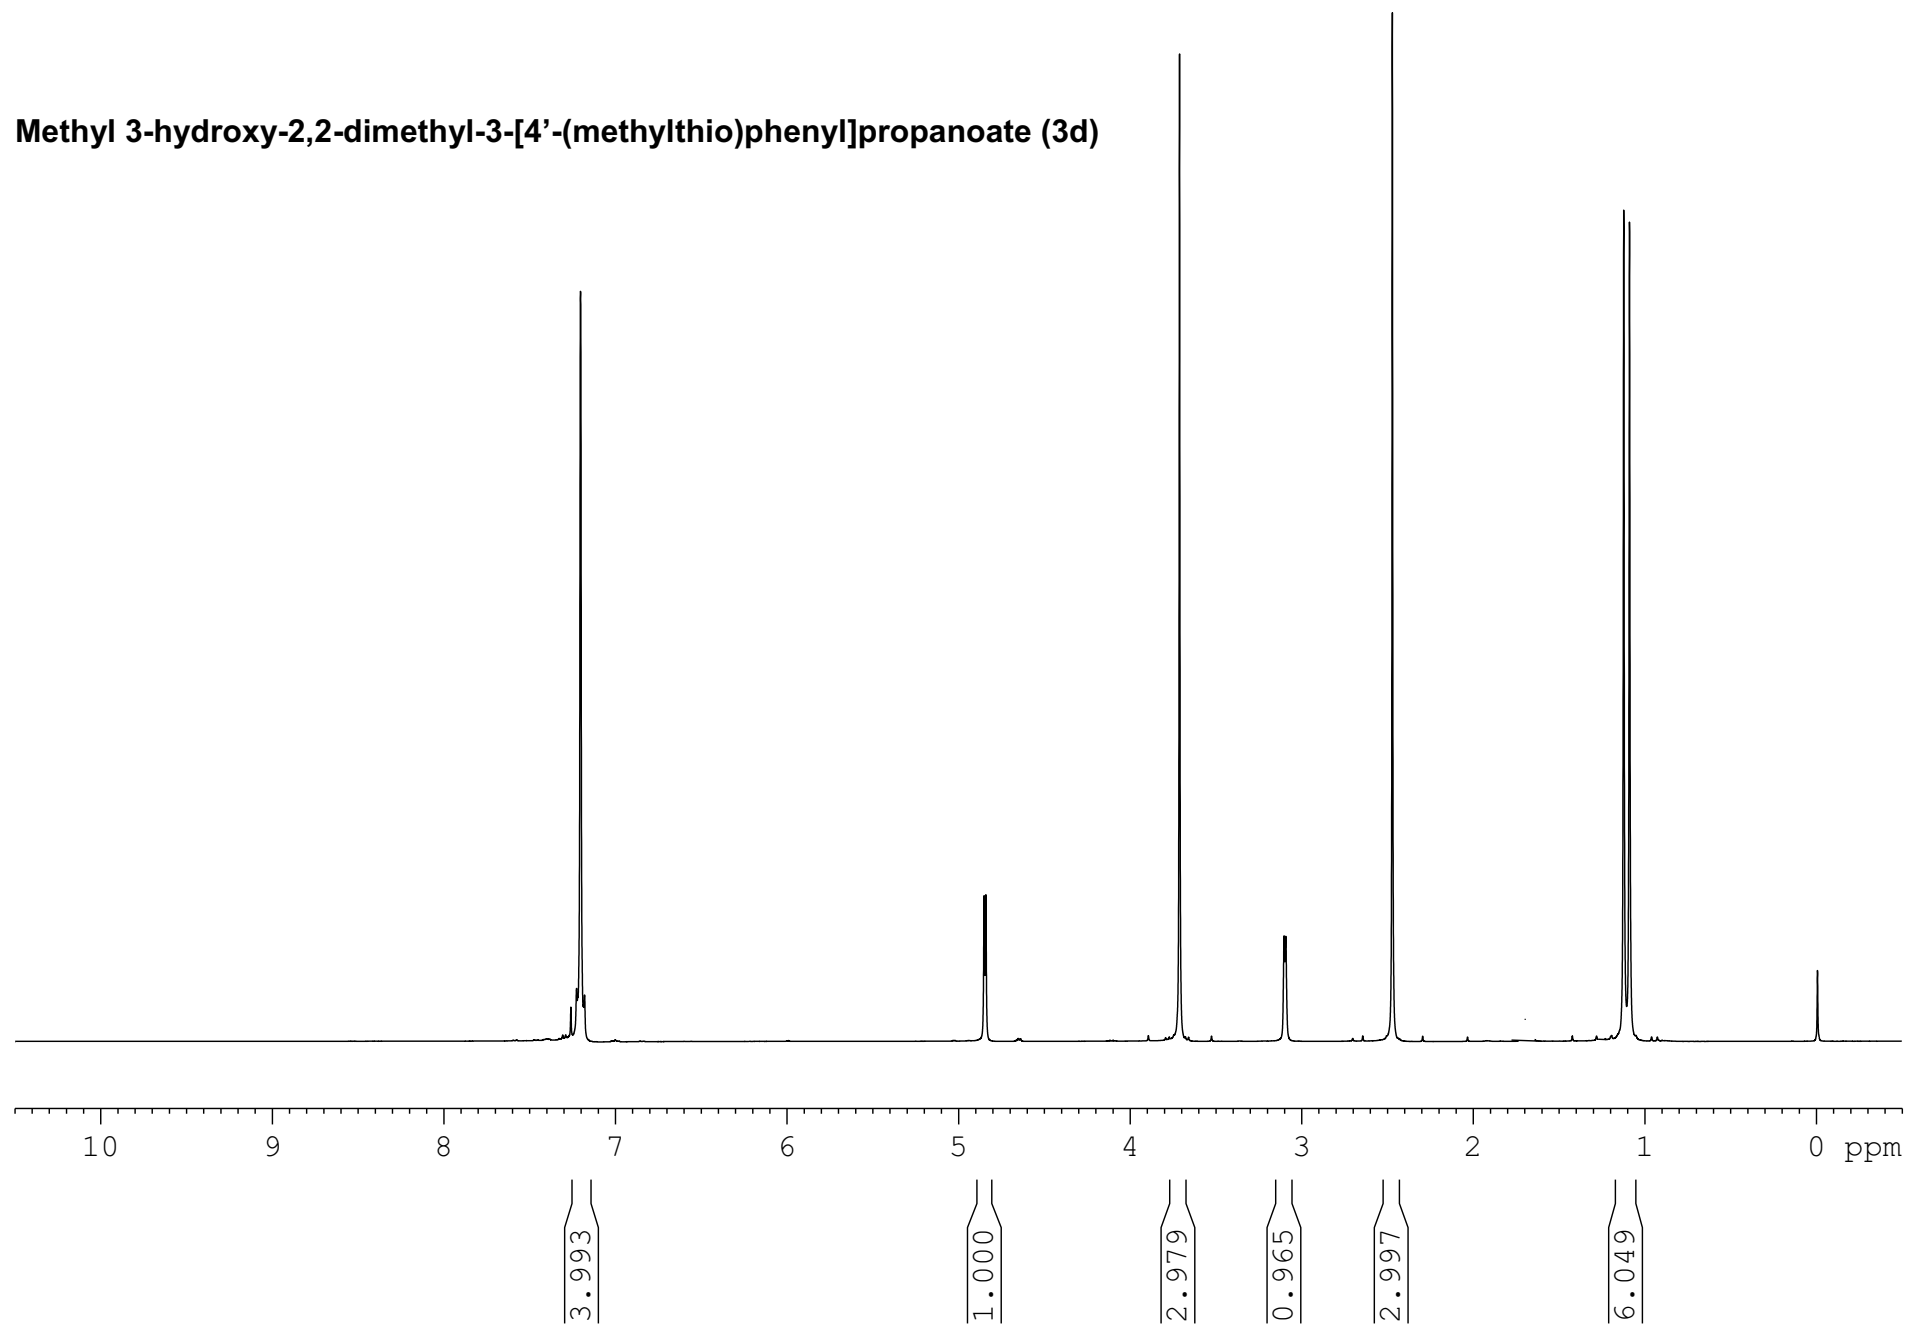

**Methyl 3-hydroxy-2,2-dimethyl-3-[4'-(methylthio)phenyl]propanoate (3d)**

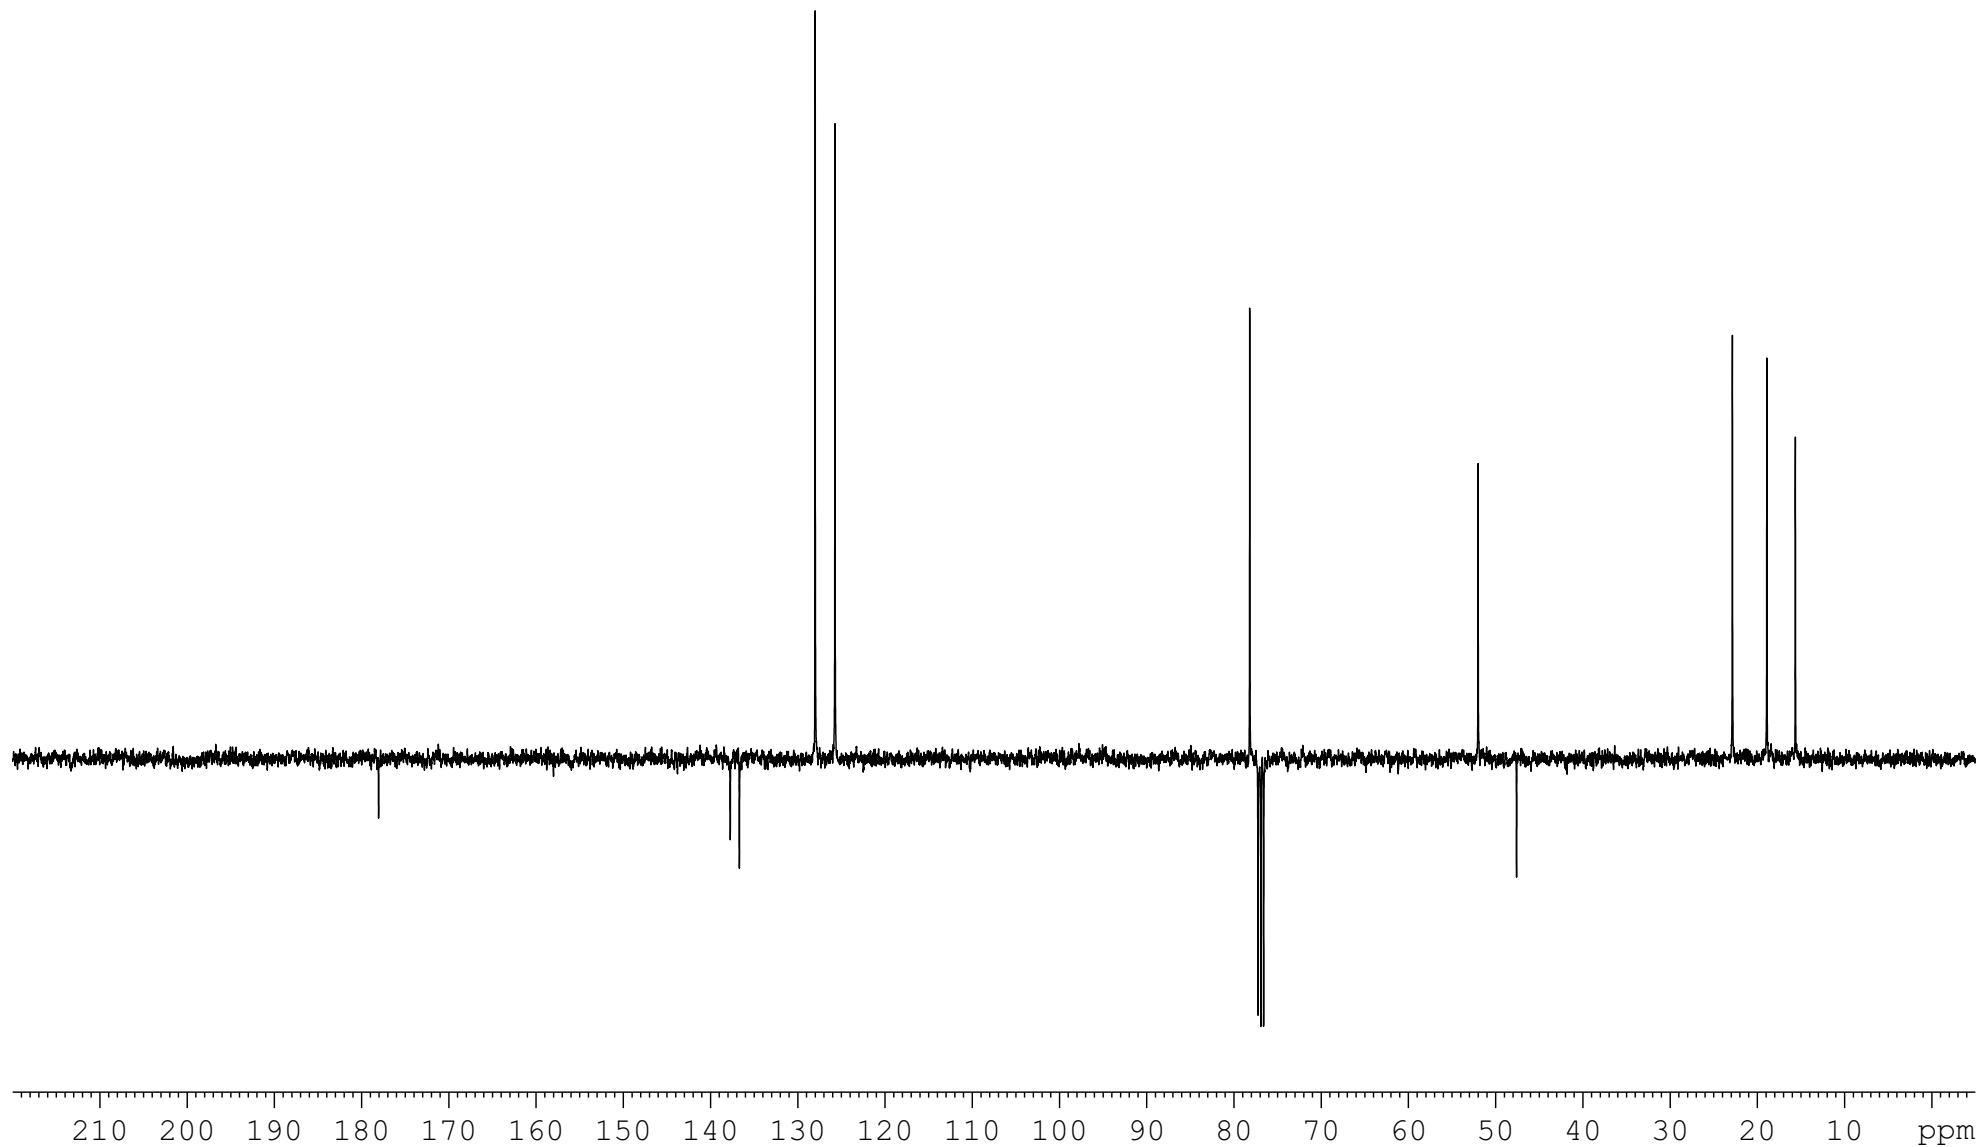

**Methyl 3-hydroxy-2,2-dimethyl-3-(4'-propoxyphenyl)propanoate (3e)**

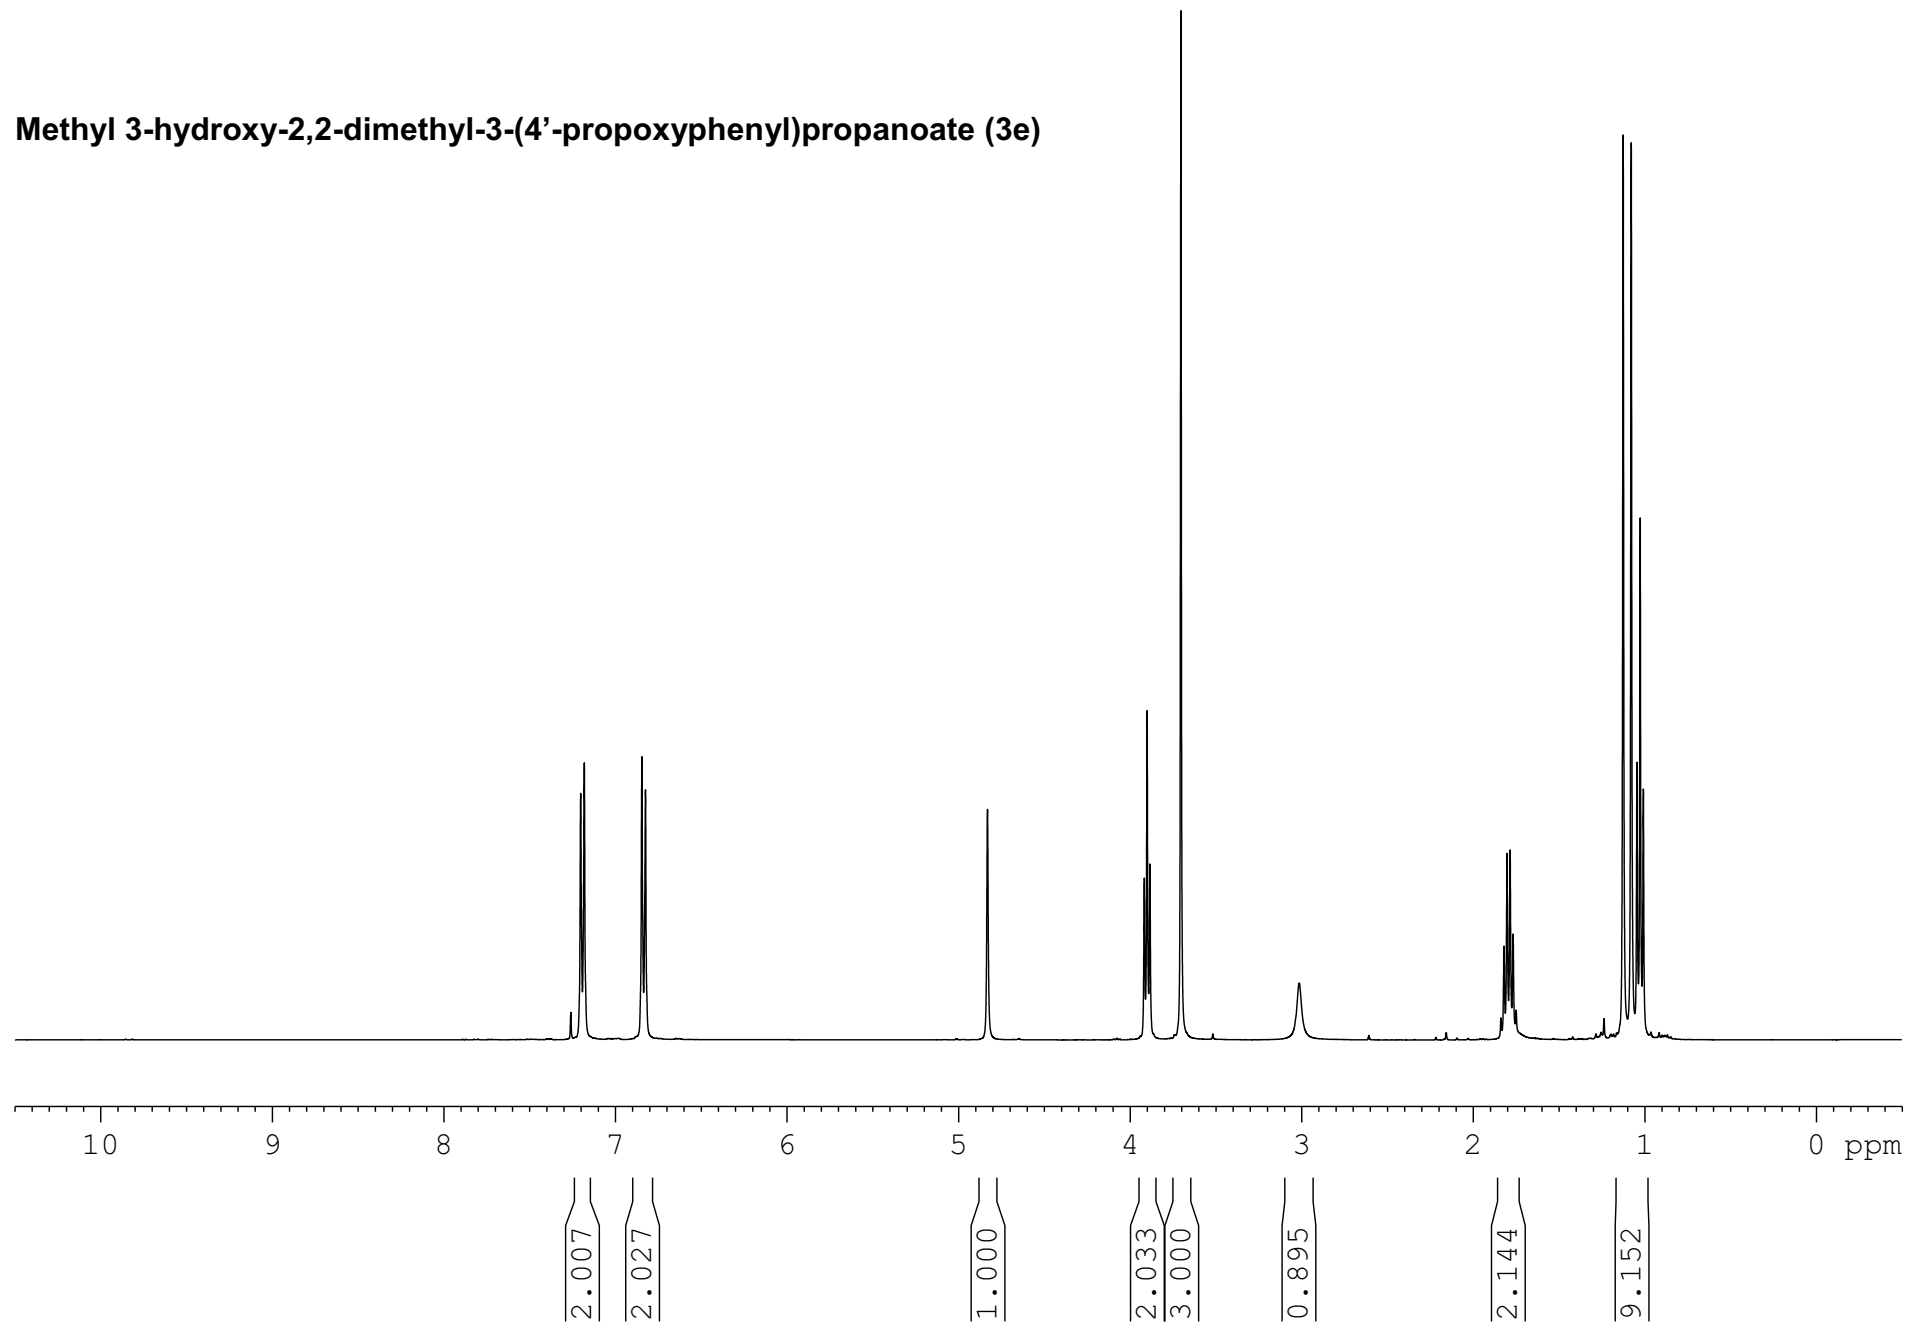

Methyl 3-hydroxy-2,2-dimethyl-3-(4'-propoxyphenyl)propanoate (3e)

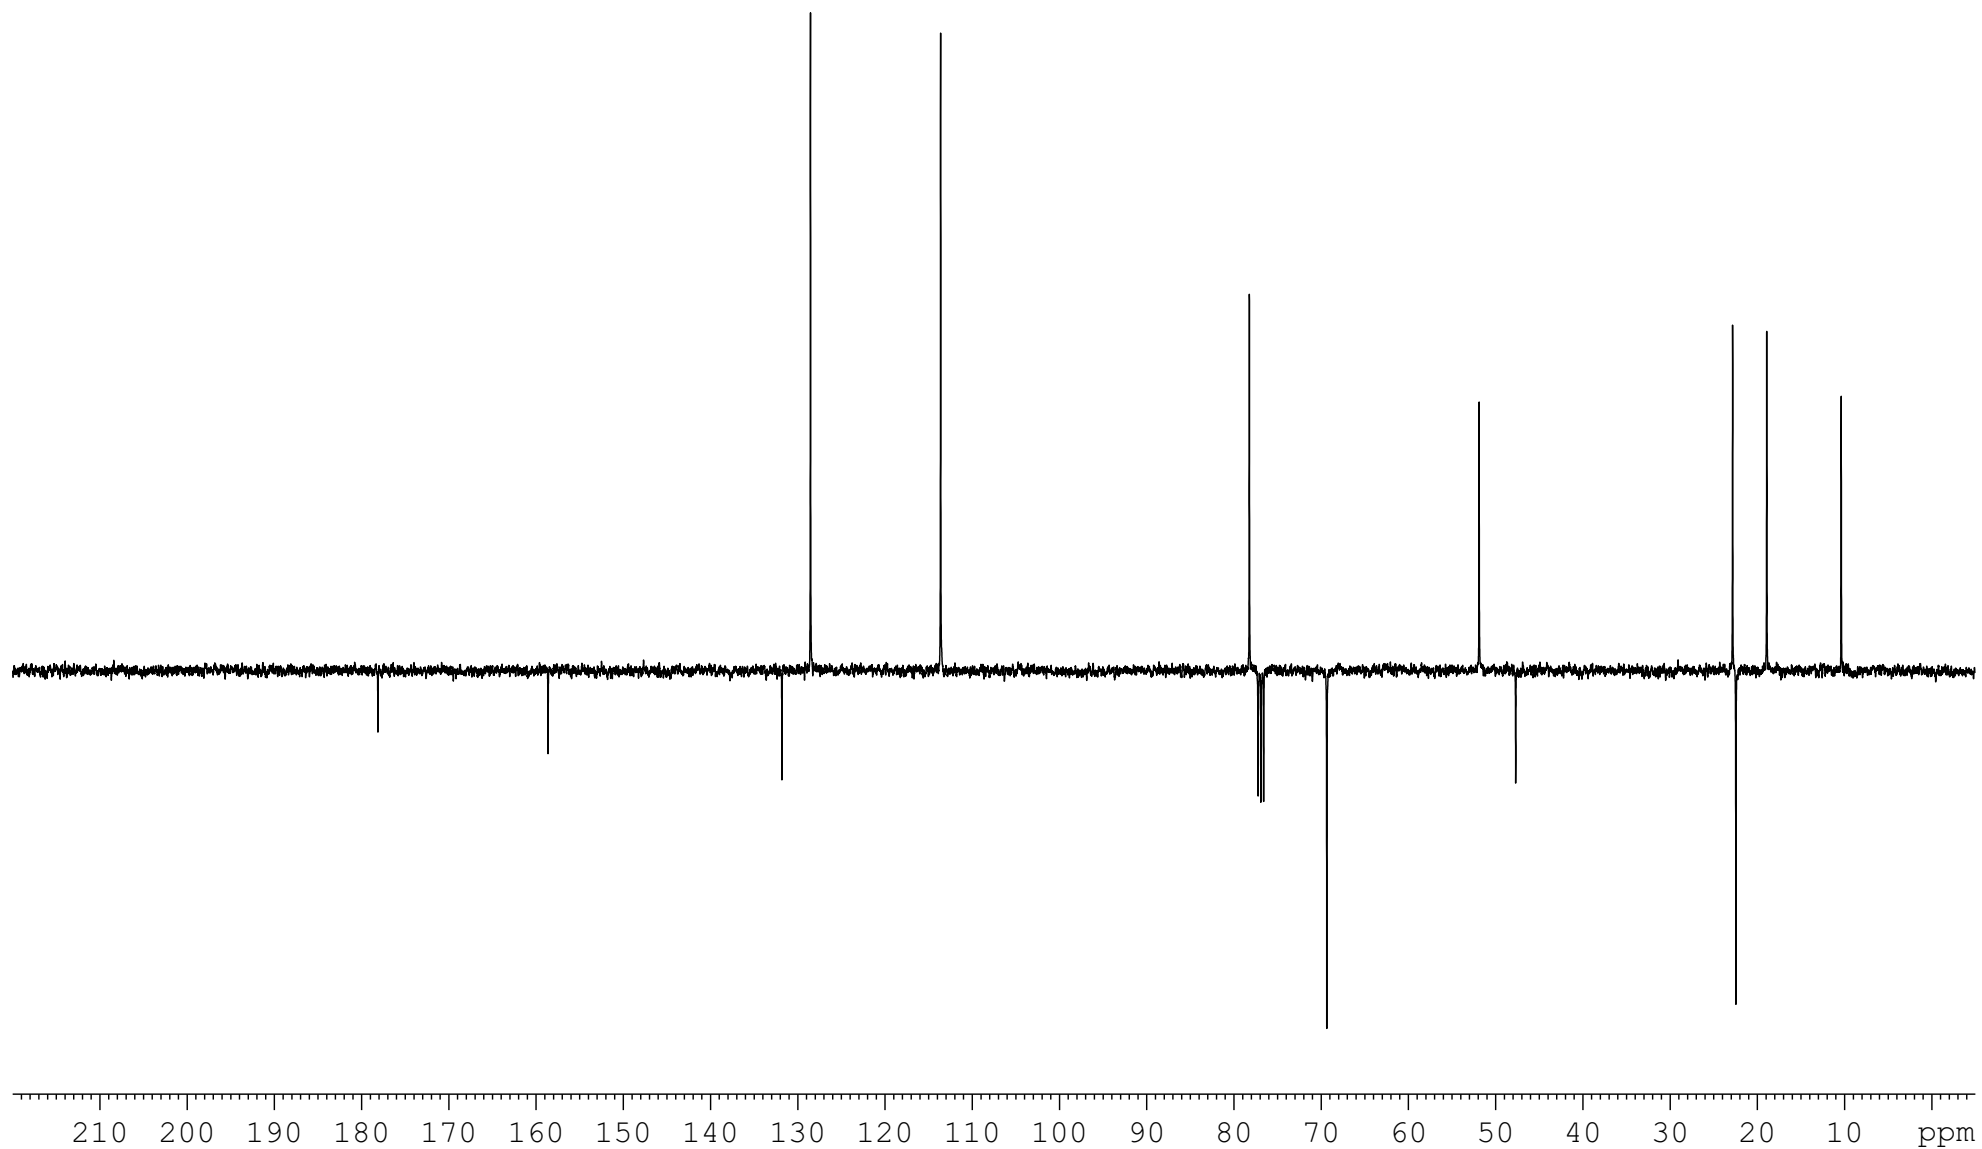

**Methyl 3-hydroxy-3-mesityl-2,2-dimethylpropanoate (3f)**

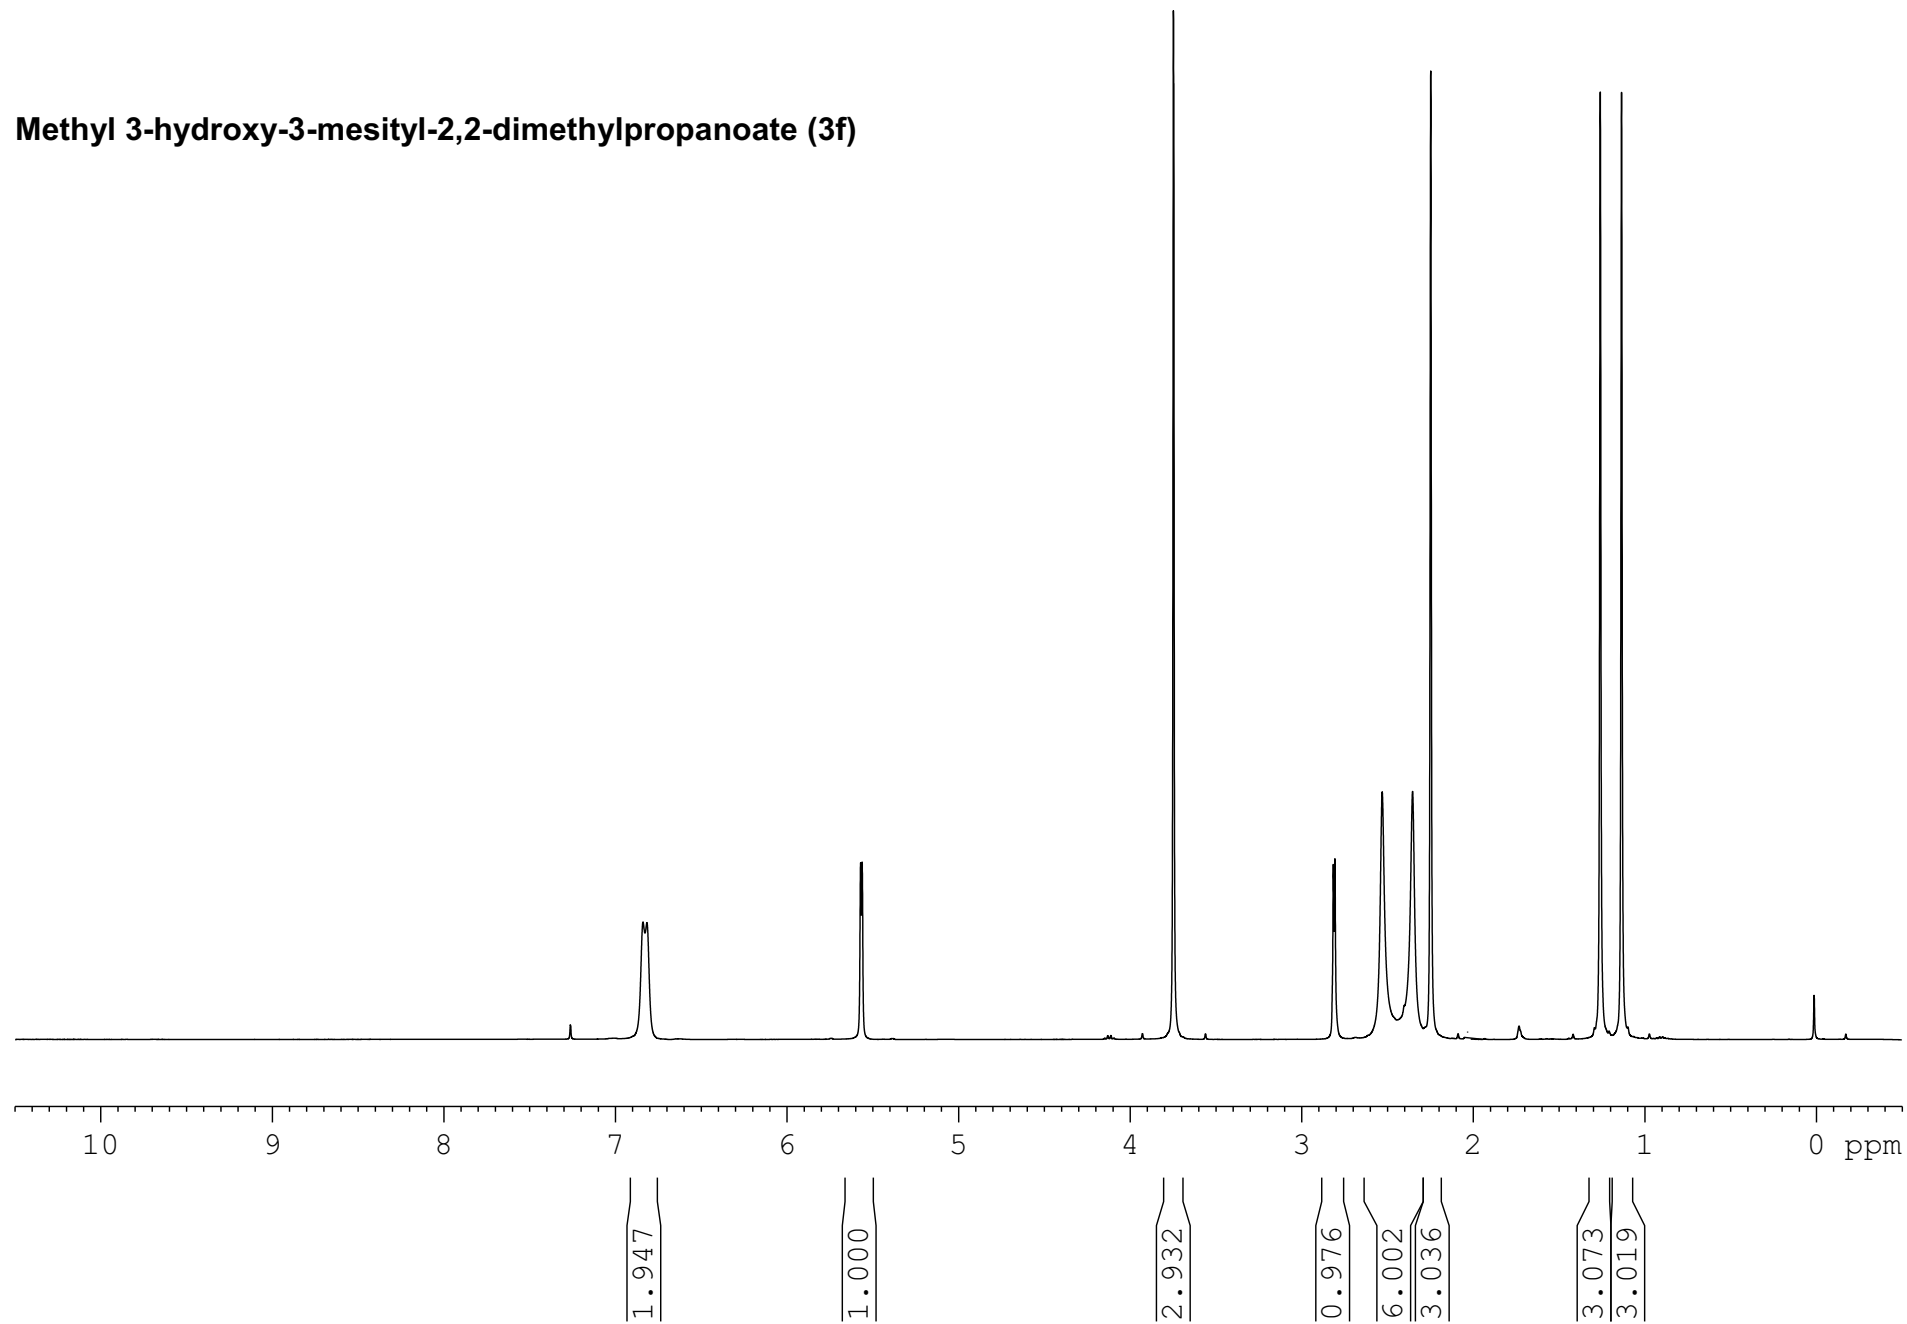

**Methyl 3-hydroxy-3-mesityl-2,2-dimethylpropanoate (3f)**

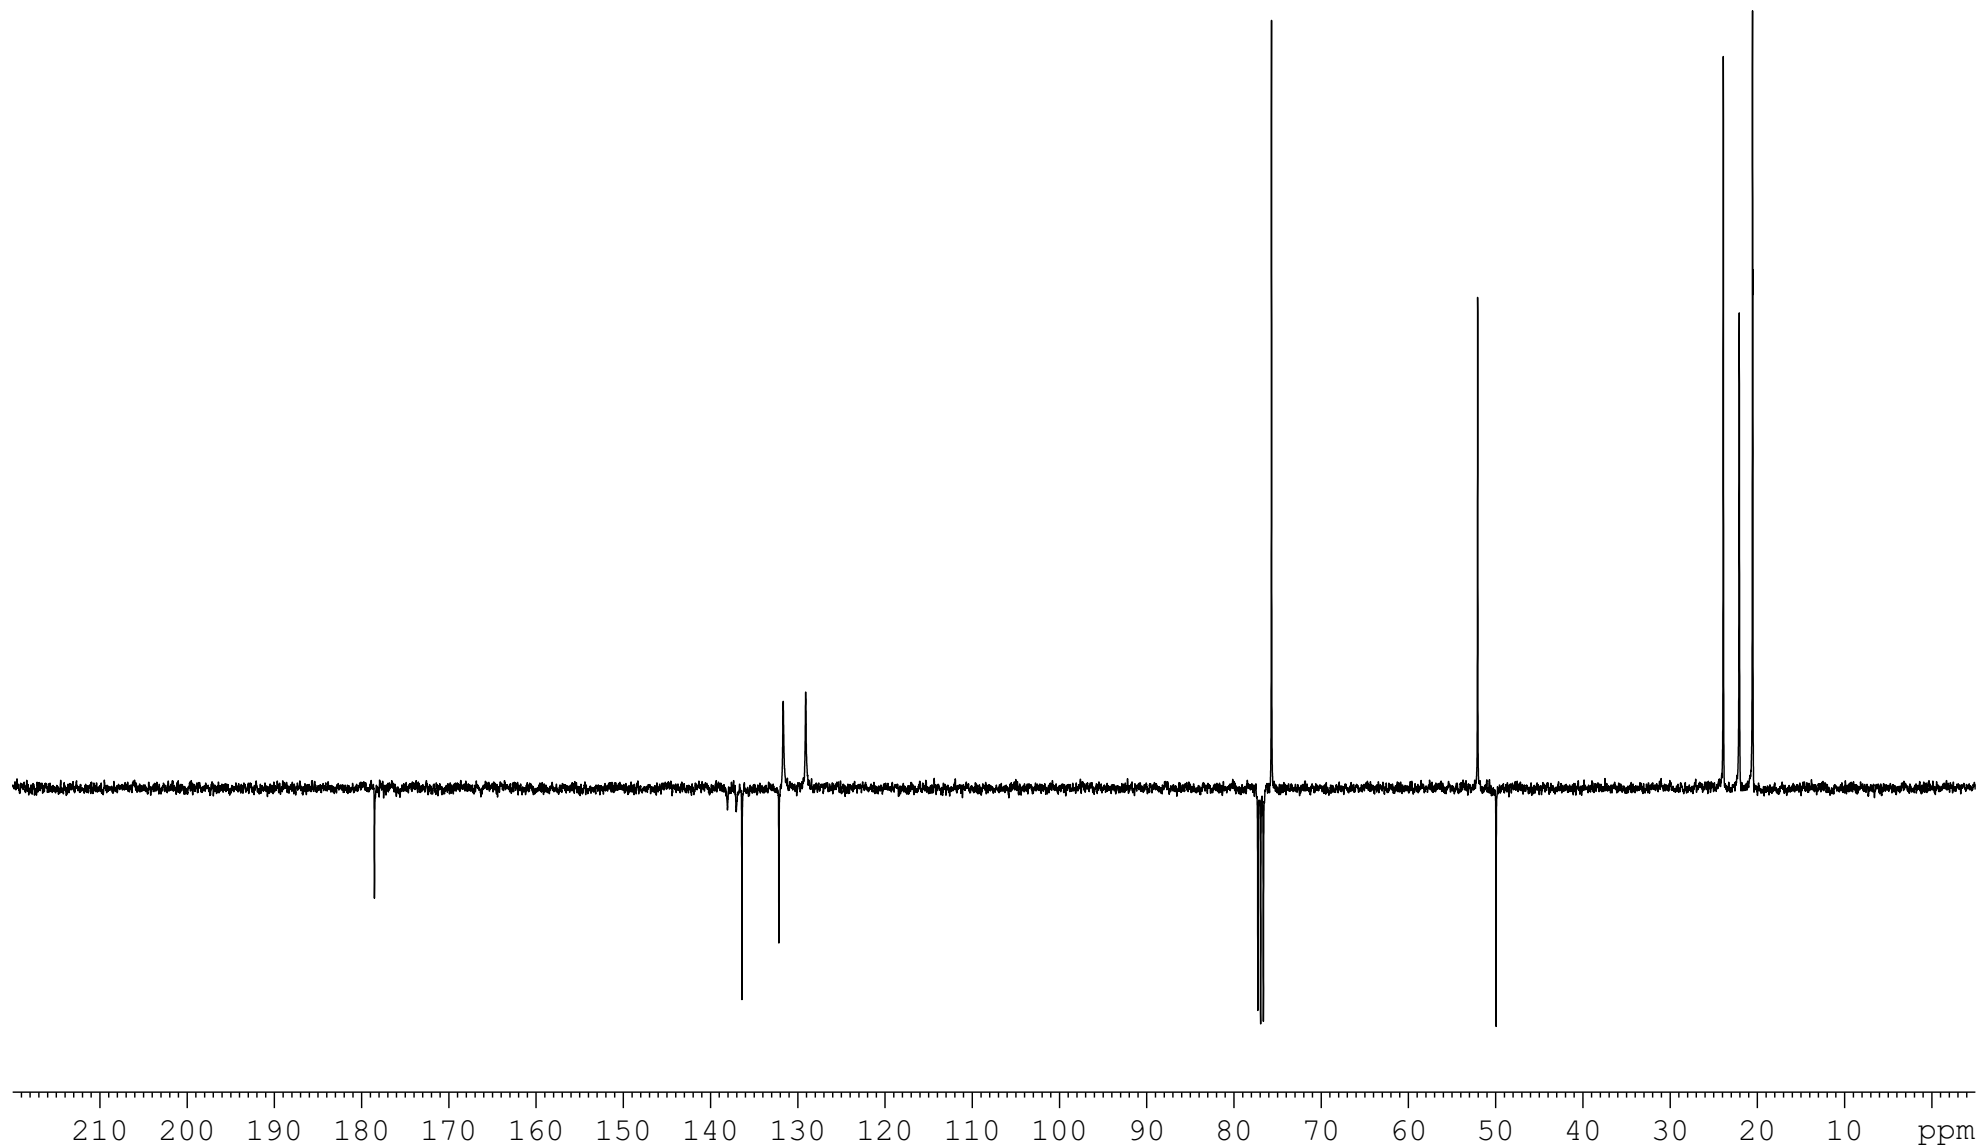

**Methyl 3-hydroxy-2,2-dimethyl-3-thien-2'-ylpropanoate (3g)**

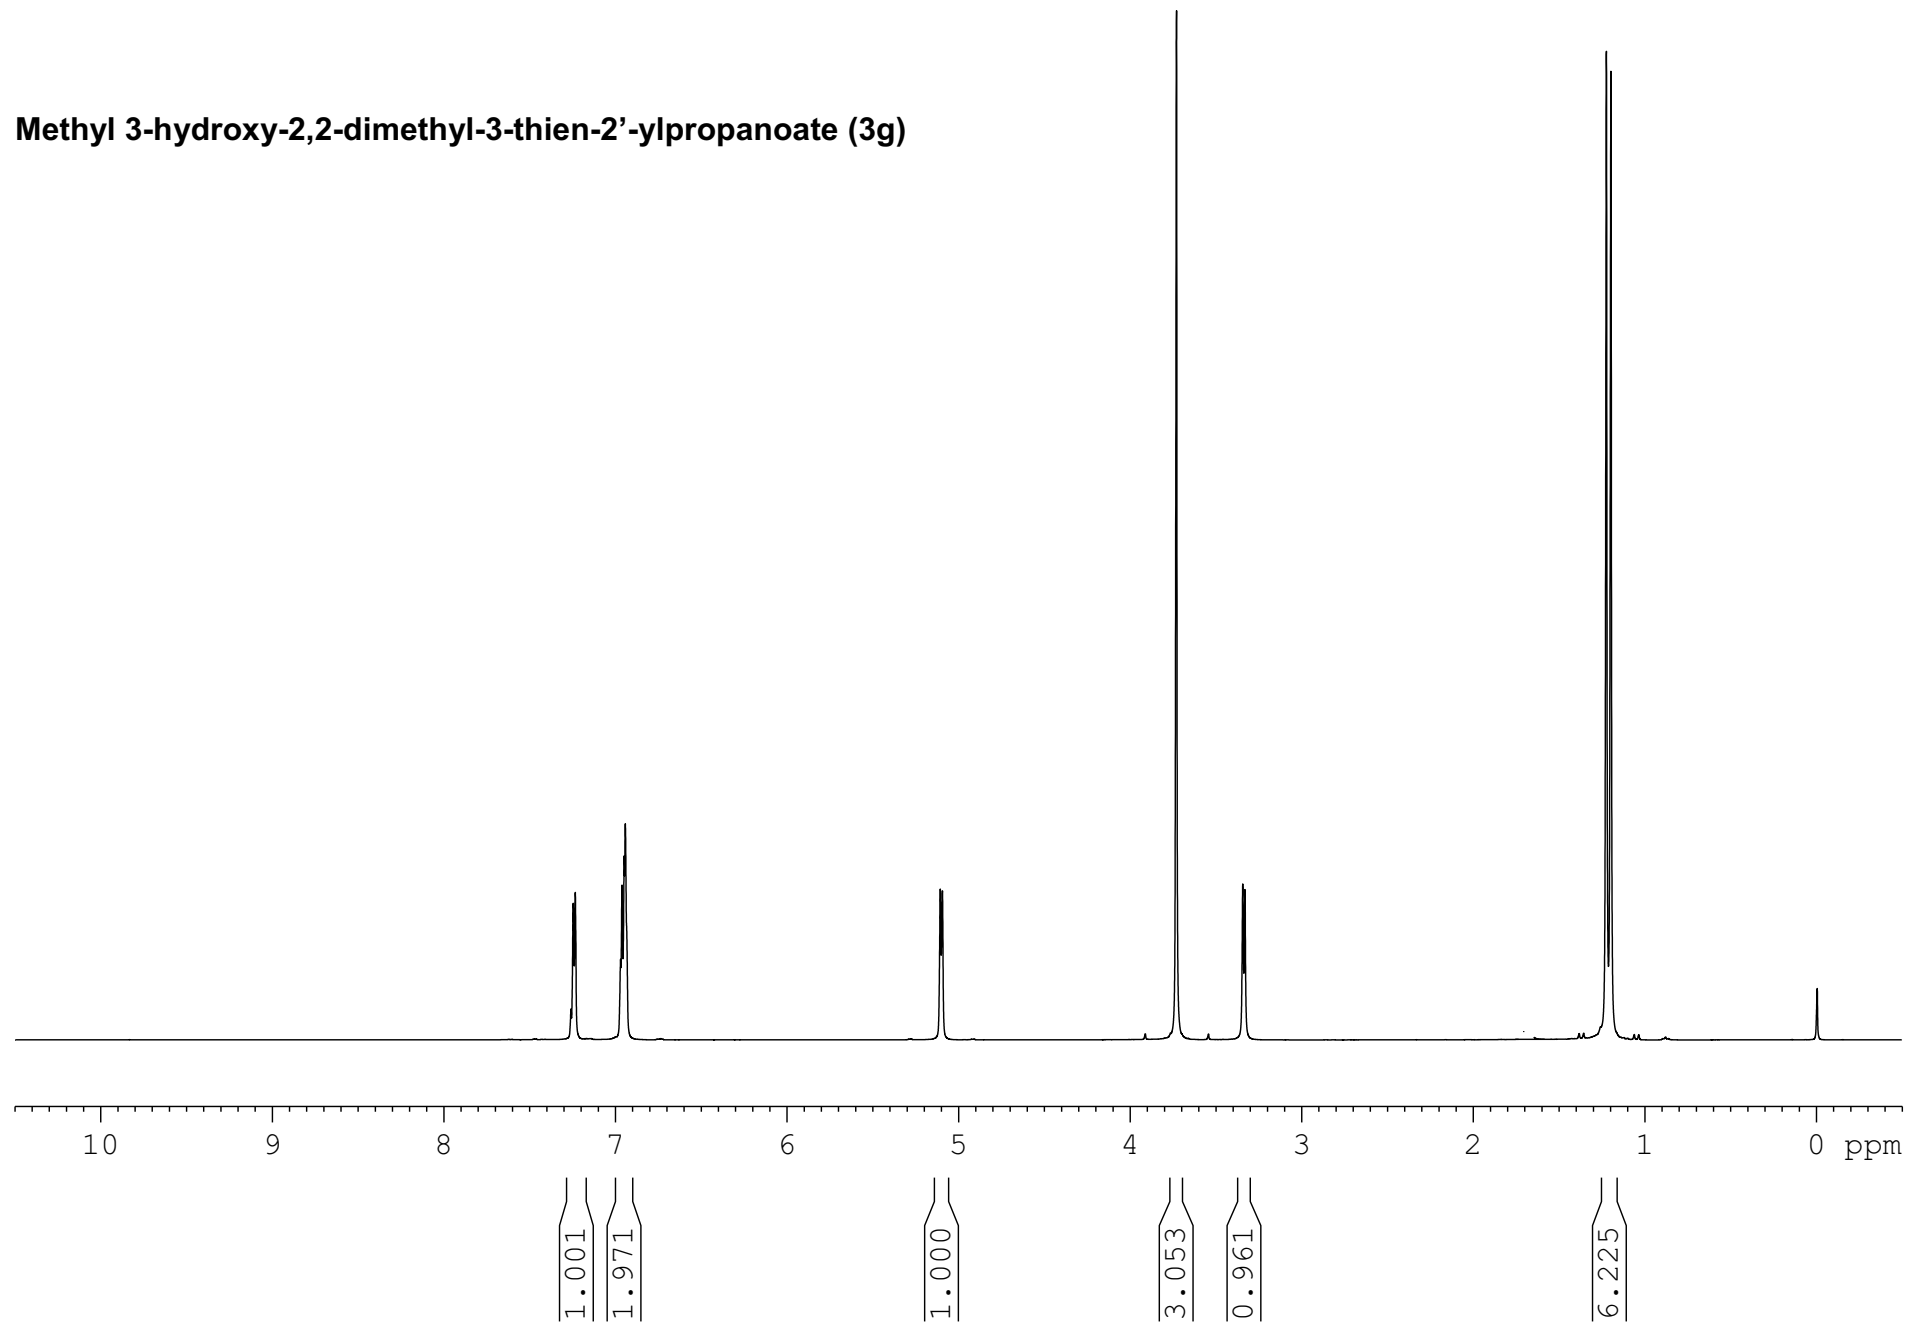



**Methyl 3-hydroxy-2,2-dimethyl-3-thien-2'-ylpropanoate (3g)**

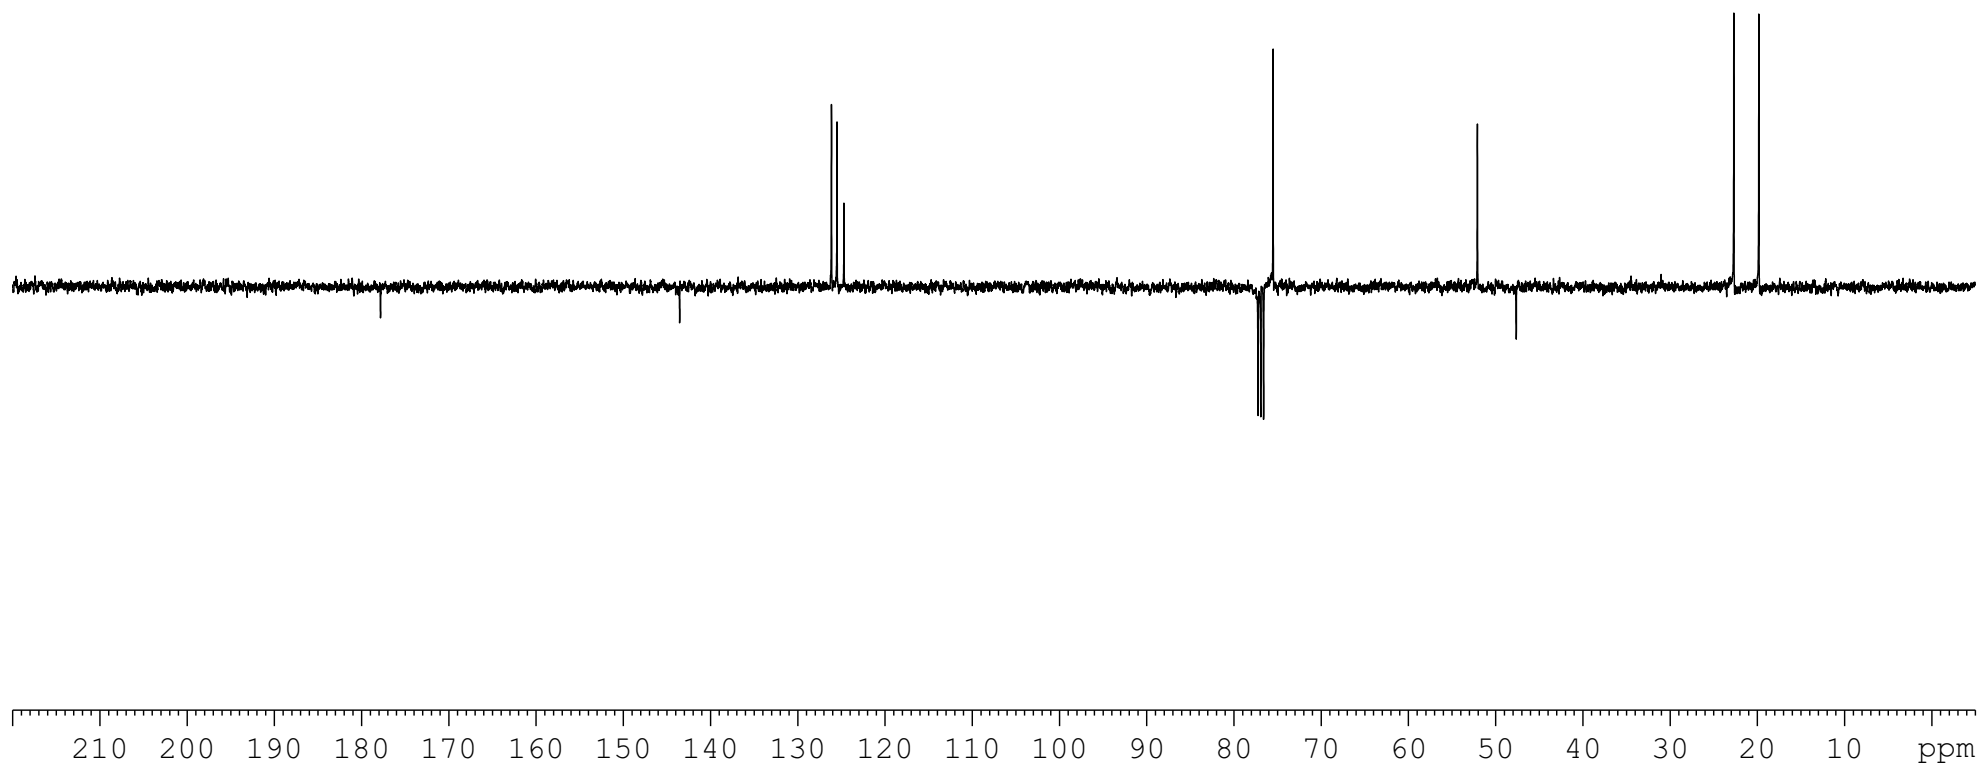

**Methyl 3-(4'-cyanophenyl)-3-hydroxy-2,2-dimethylpropanoate (3h)**

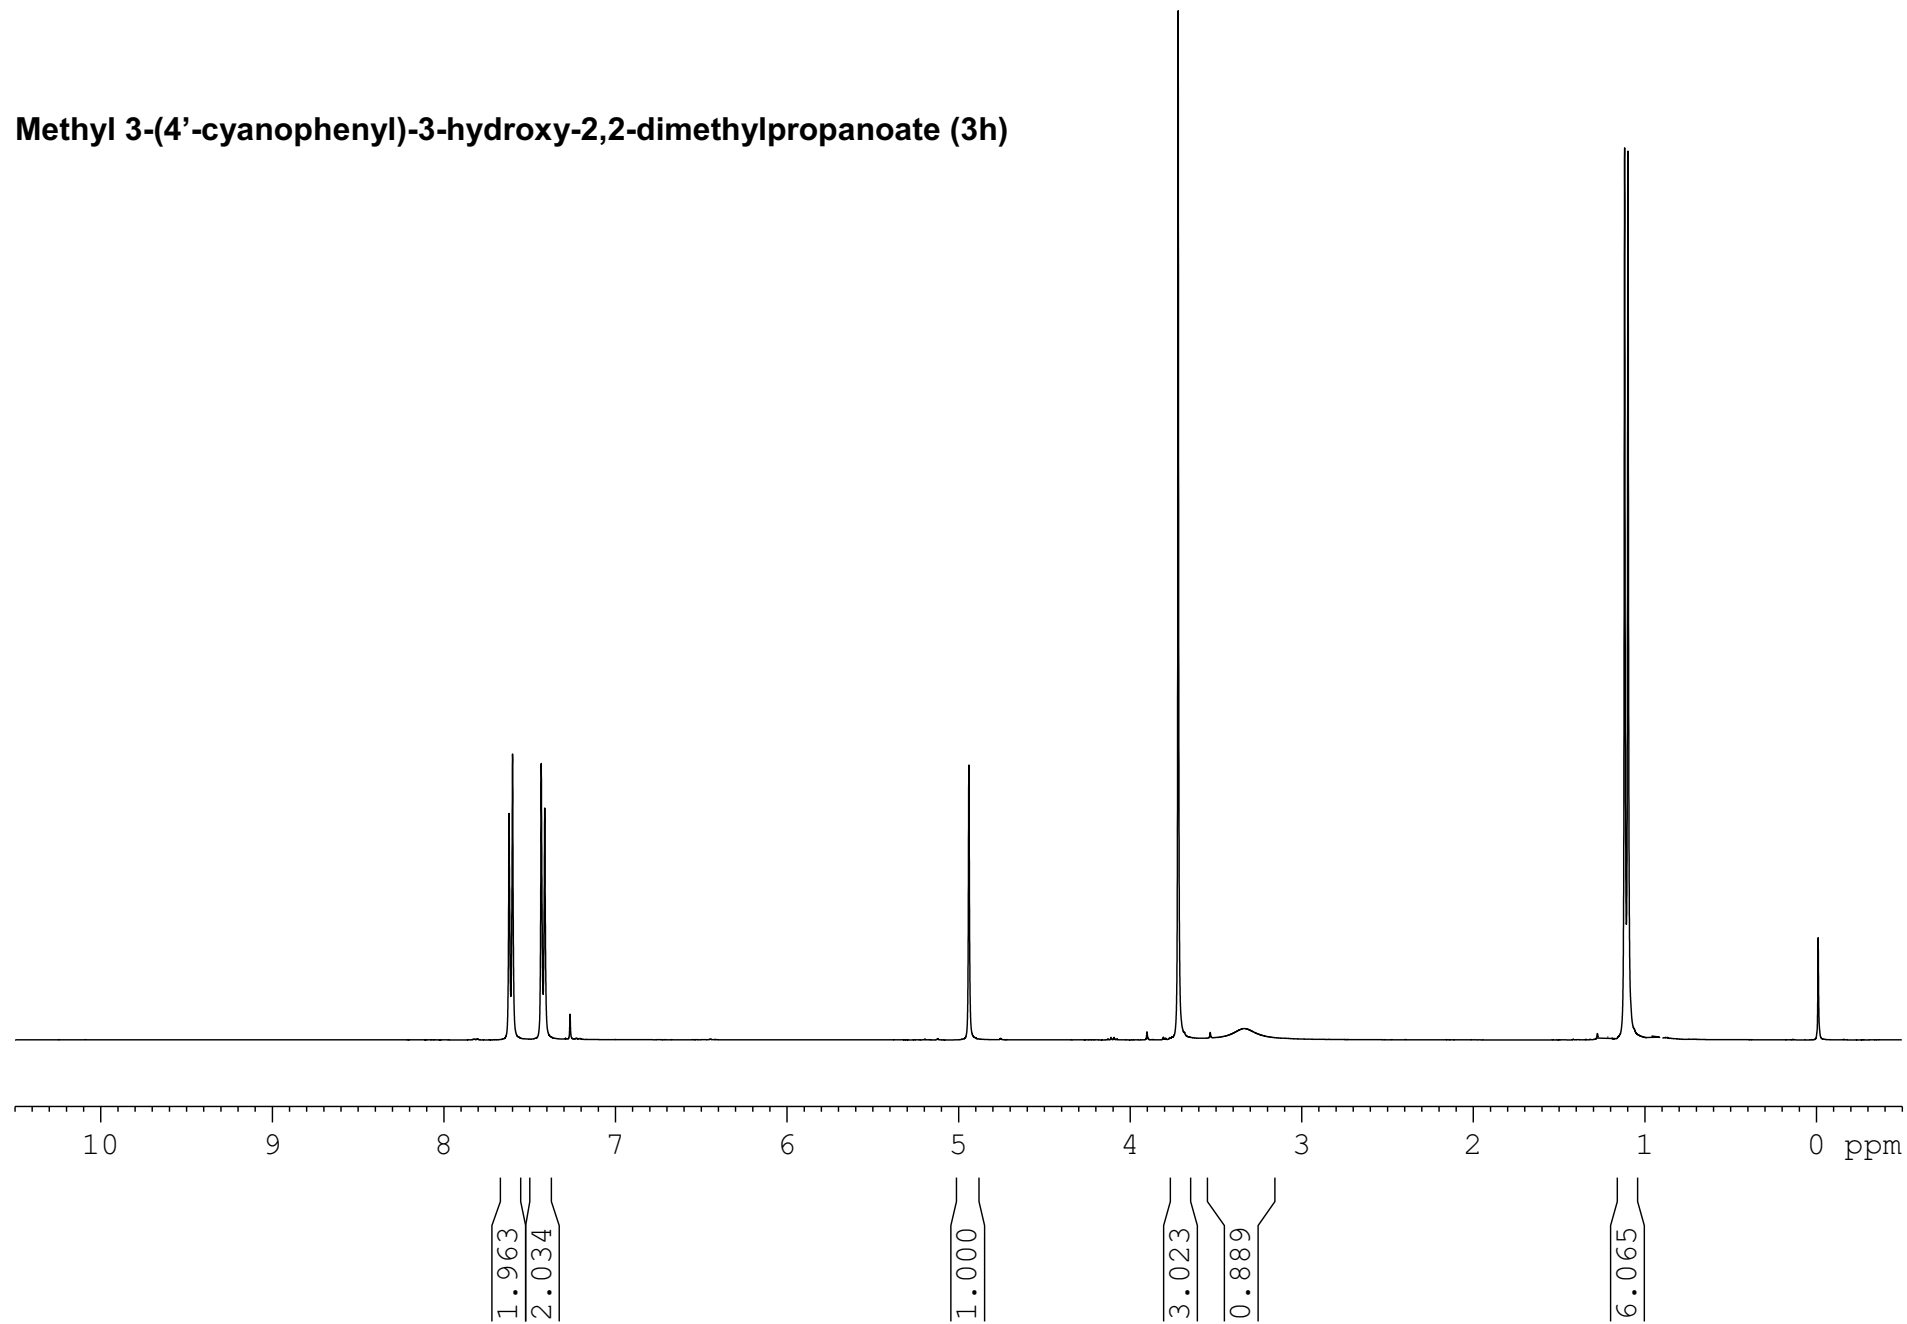

**Methyl 3-(4'-cyanophenyl)-3-hydroxy-2,2-dimethylpropanoate (3h)**

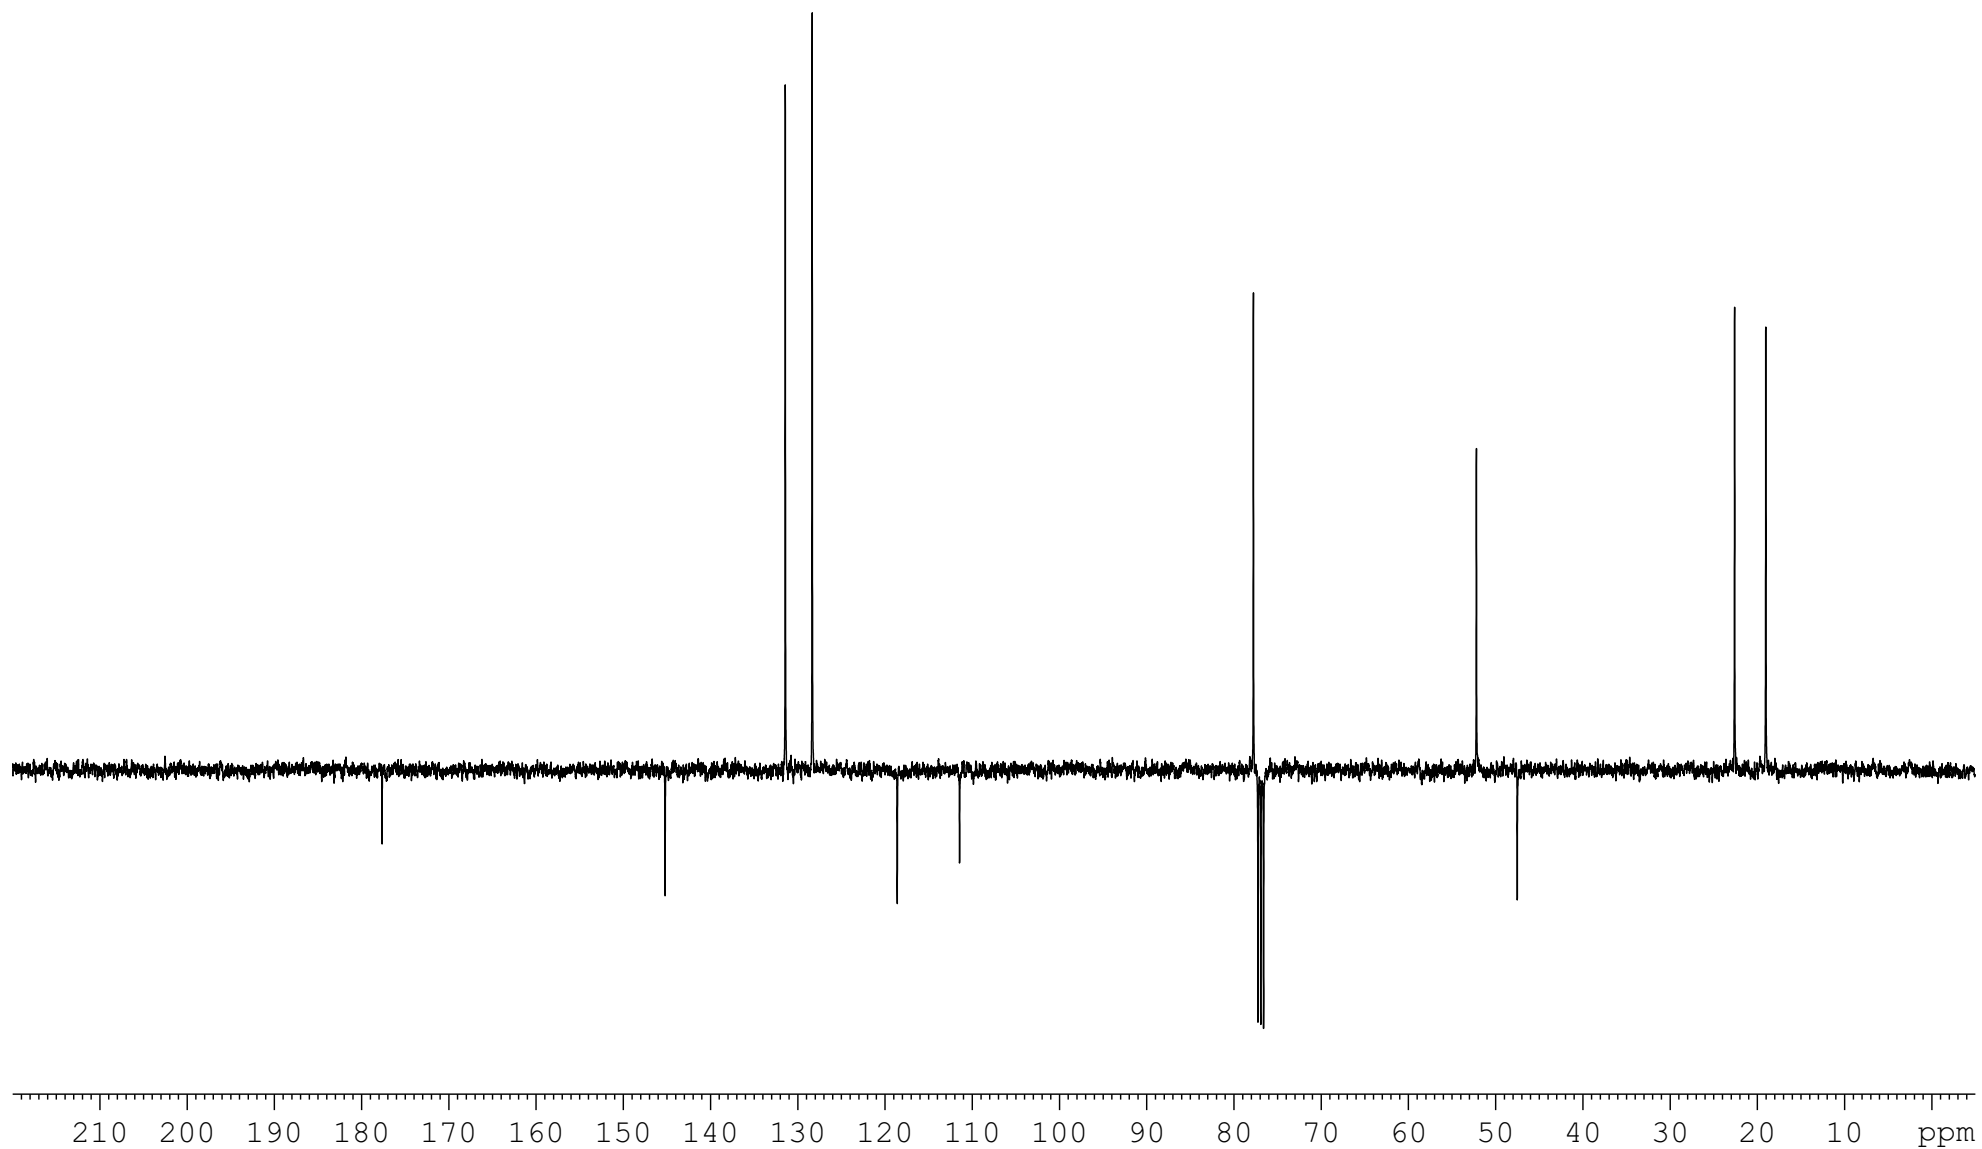

**Methyl 3-(4'-chlorophenyl)-3-hydroxy-2,2-dimethylpropanoate (3i)**

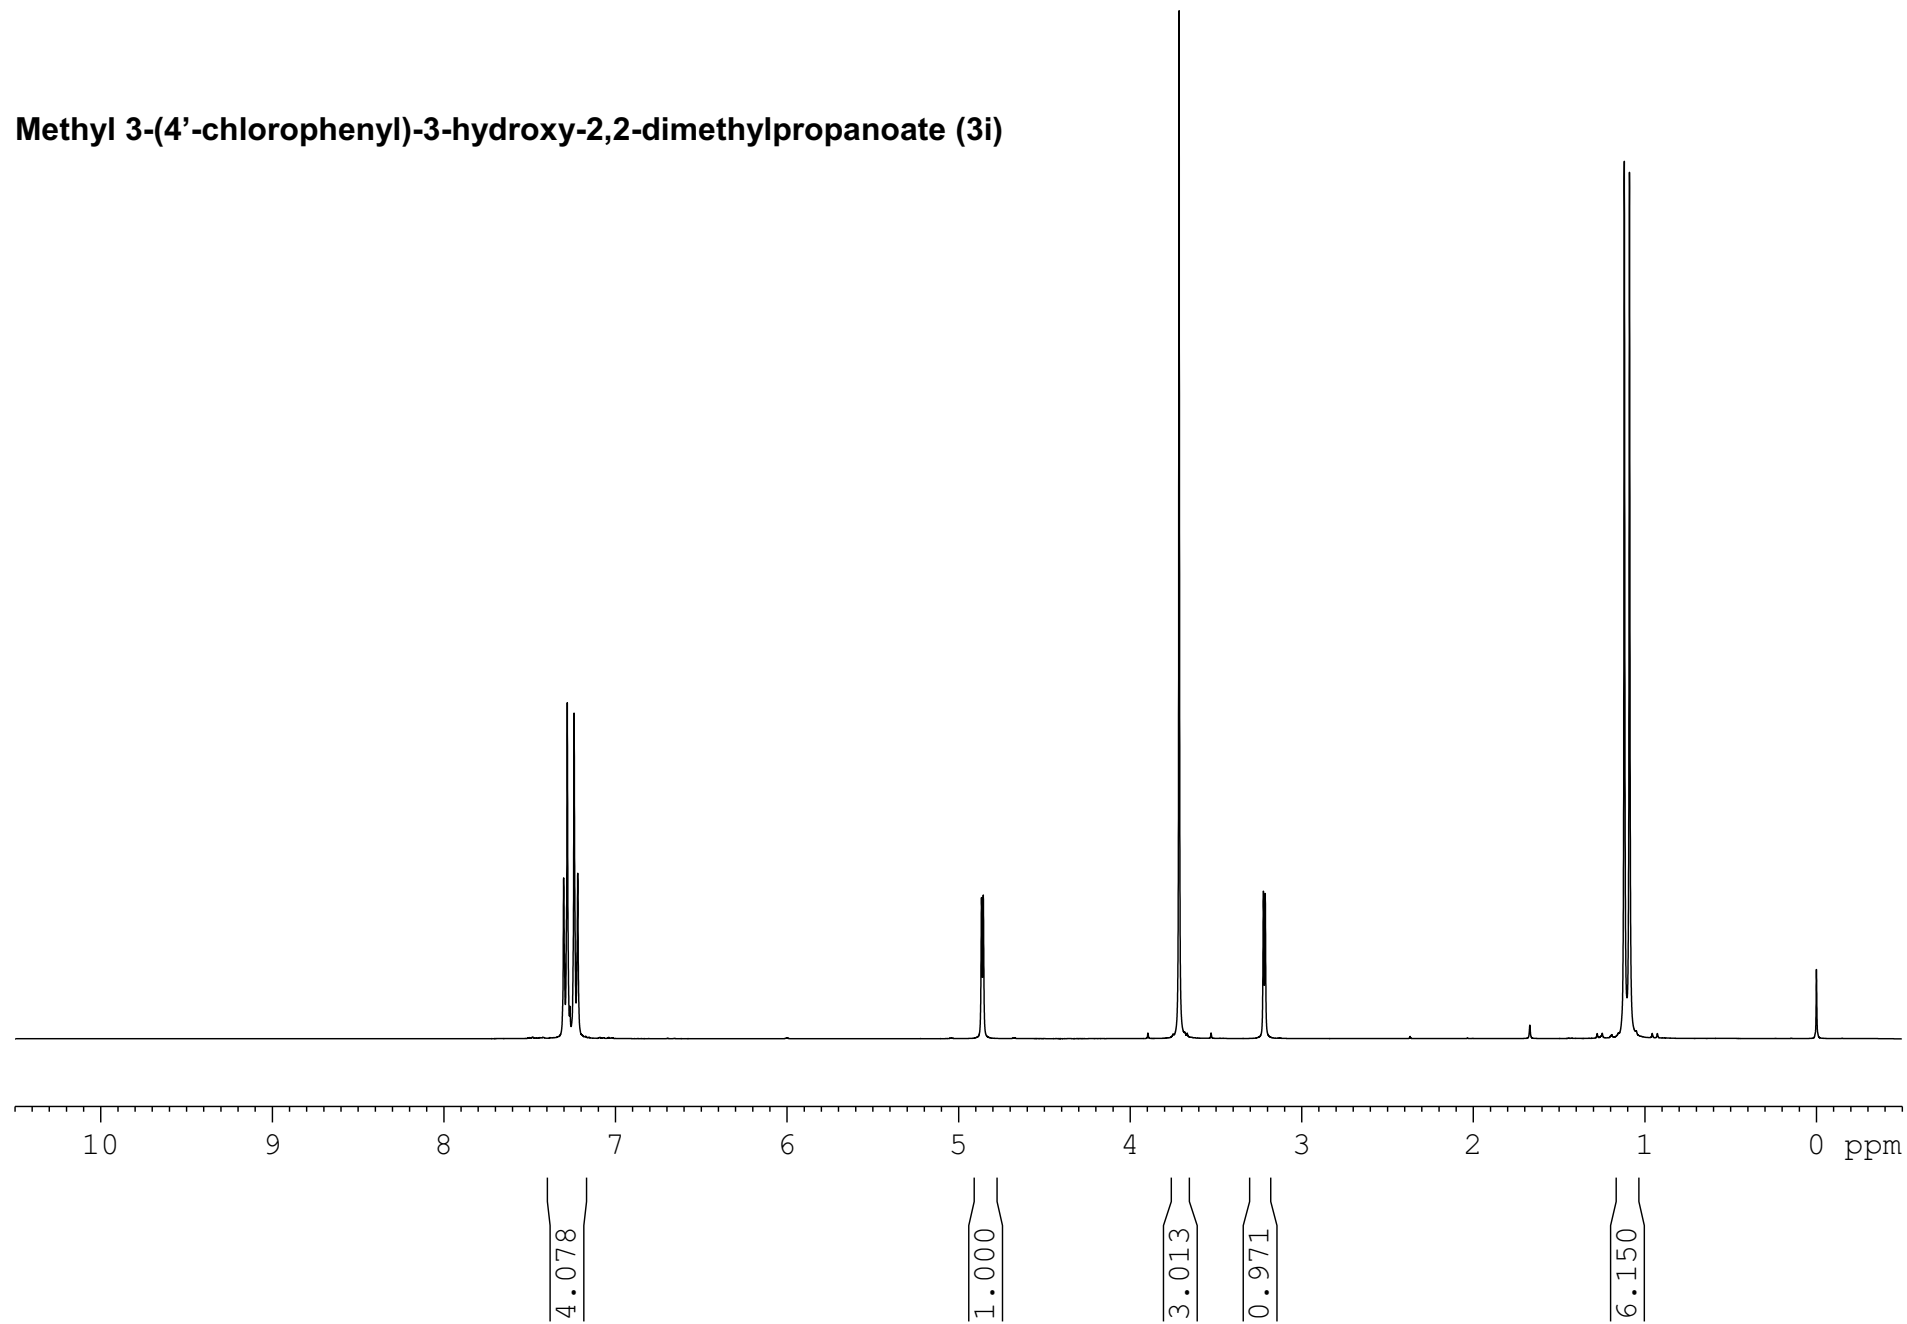

**Methyl 3-(4'-chlorophenyl)-3-hydroxy-2,2-dimethylpropanoate (3i)**

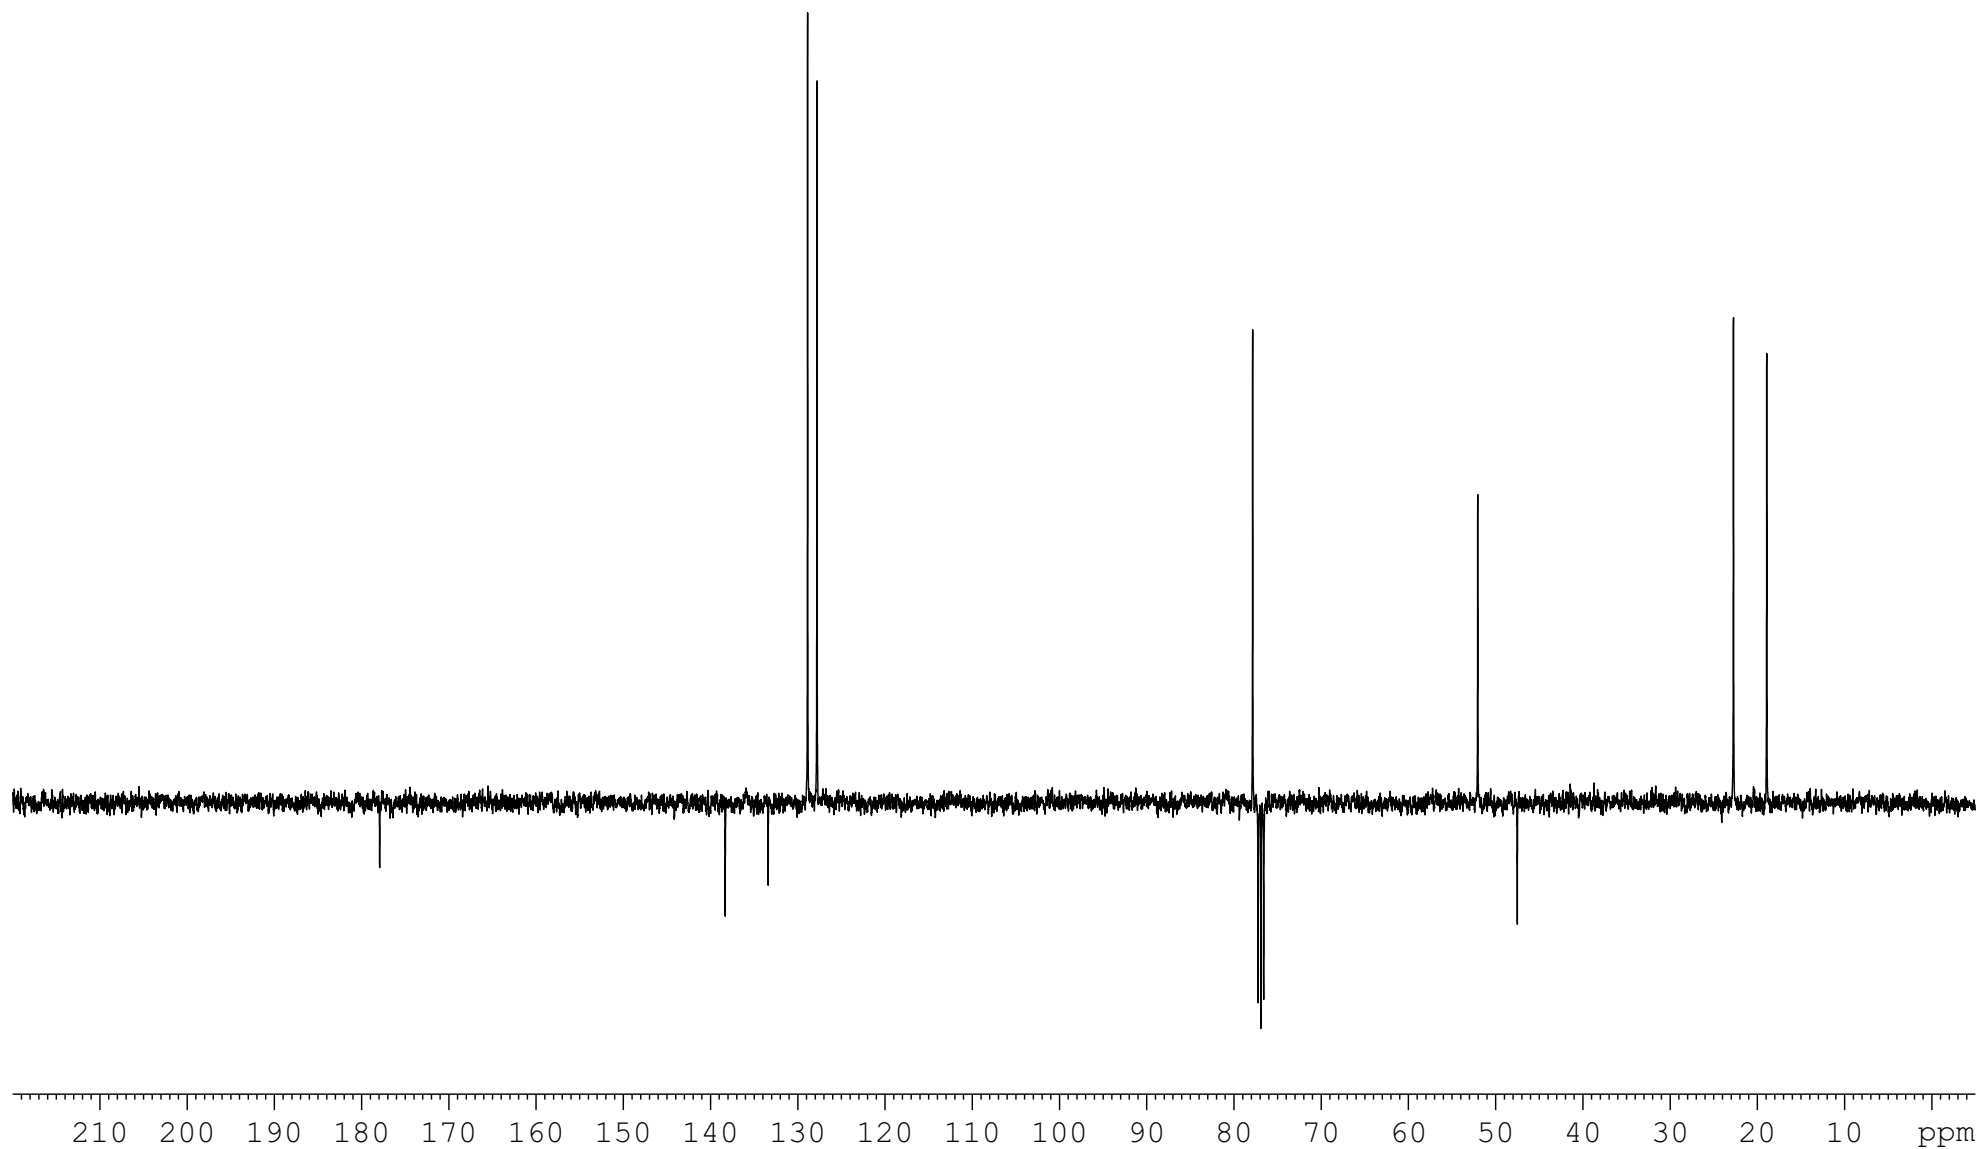

**Methyl 3-(2'-chloro-6'-fluorophenyl)-3-hydroxy-2,2-dimethylpropanoate (3j)**

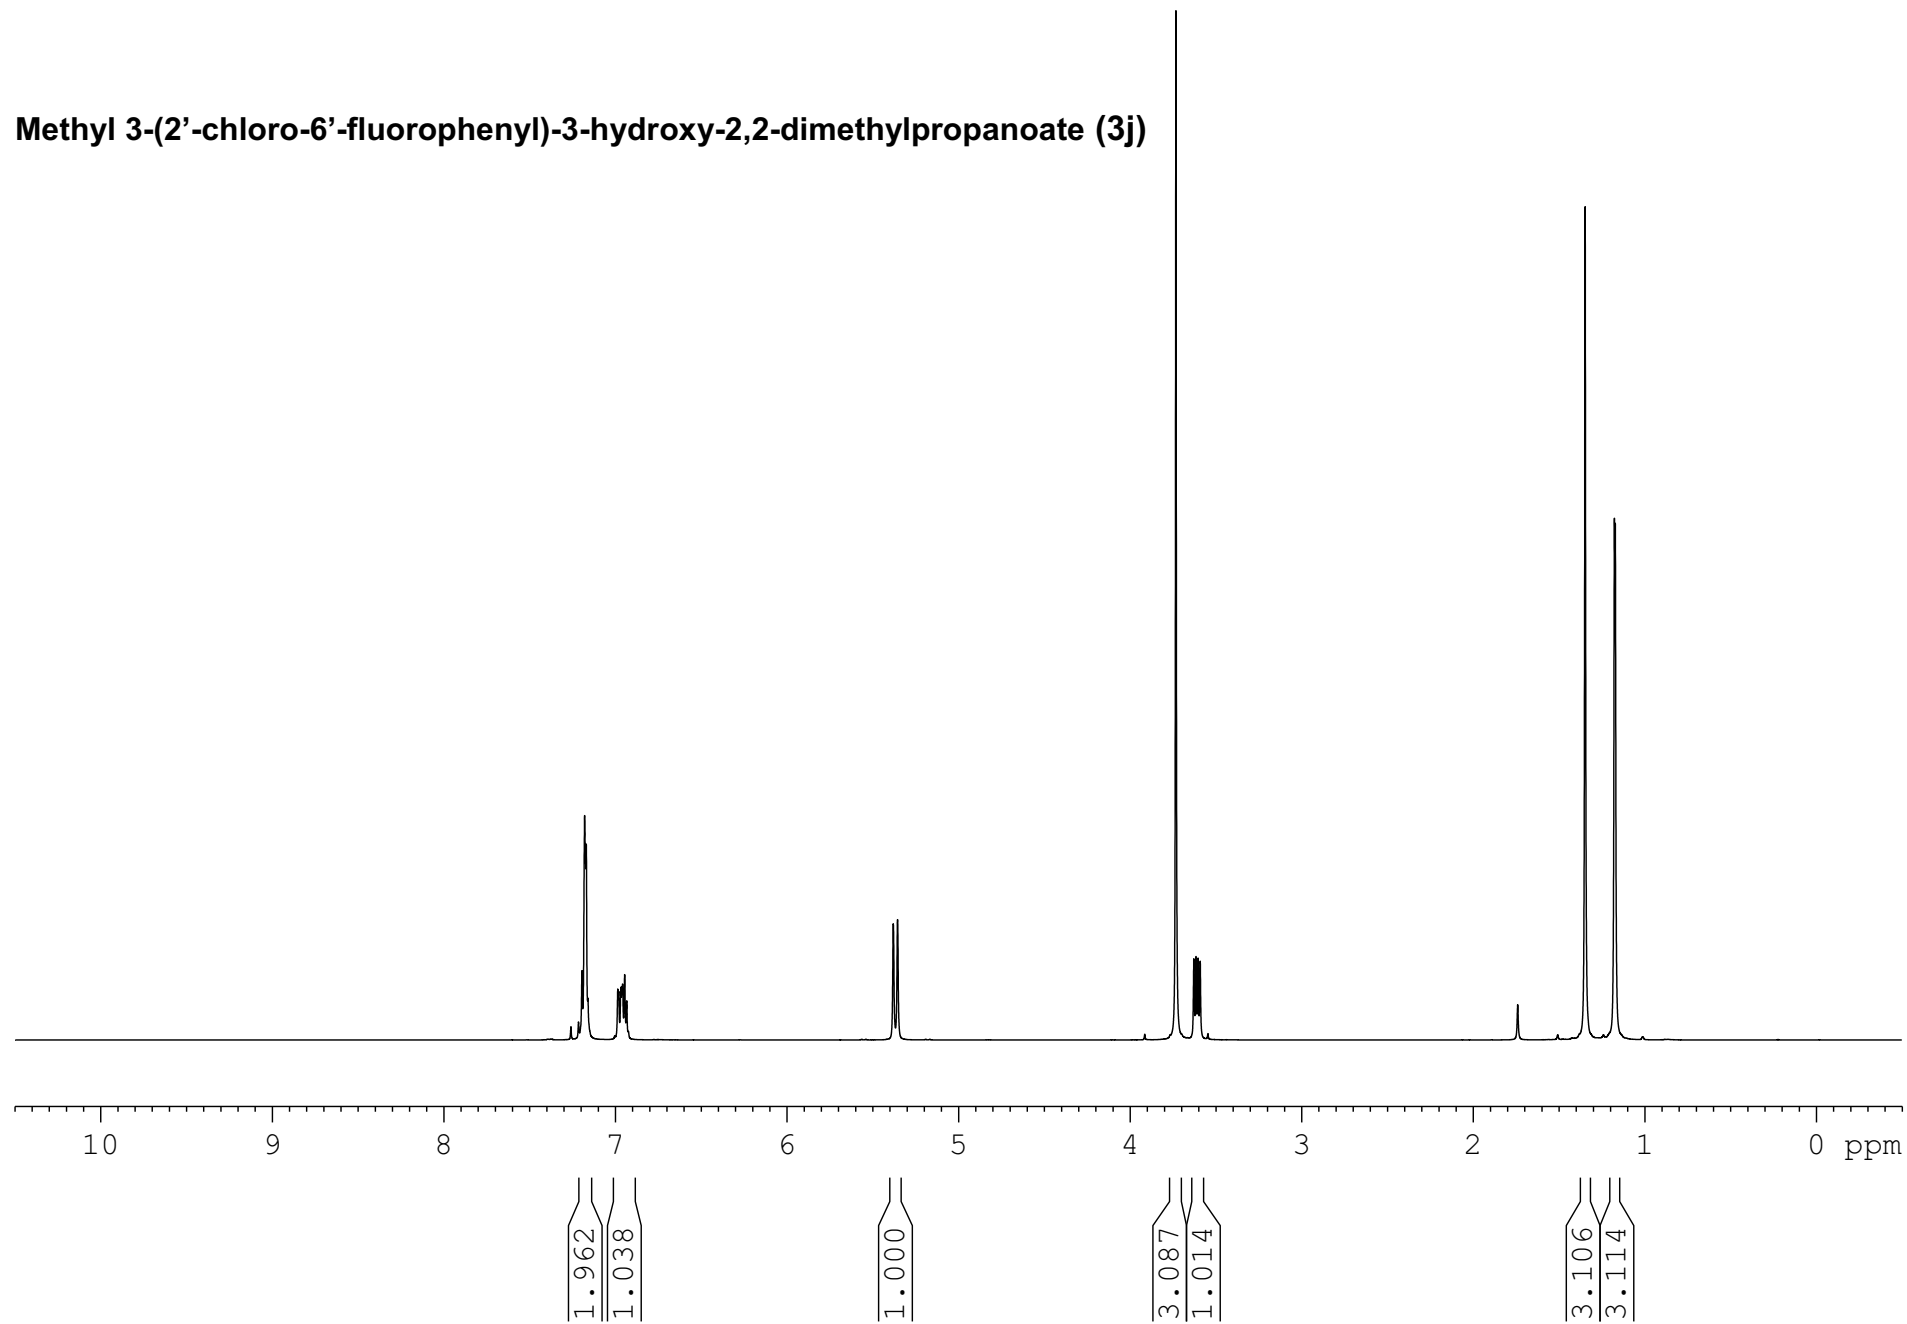

**Methyl 3-(2'-chloro-6'-fluorophenyl)-3-hydroxy-2,2-dimethylpropanoate (3j)**

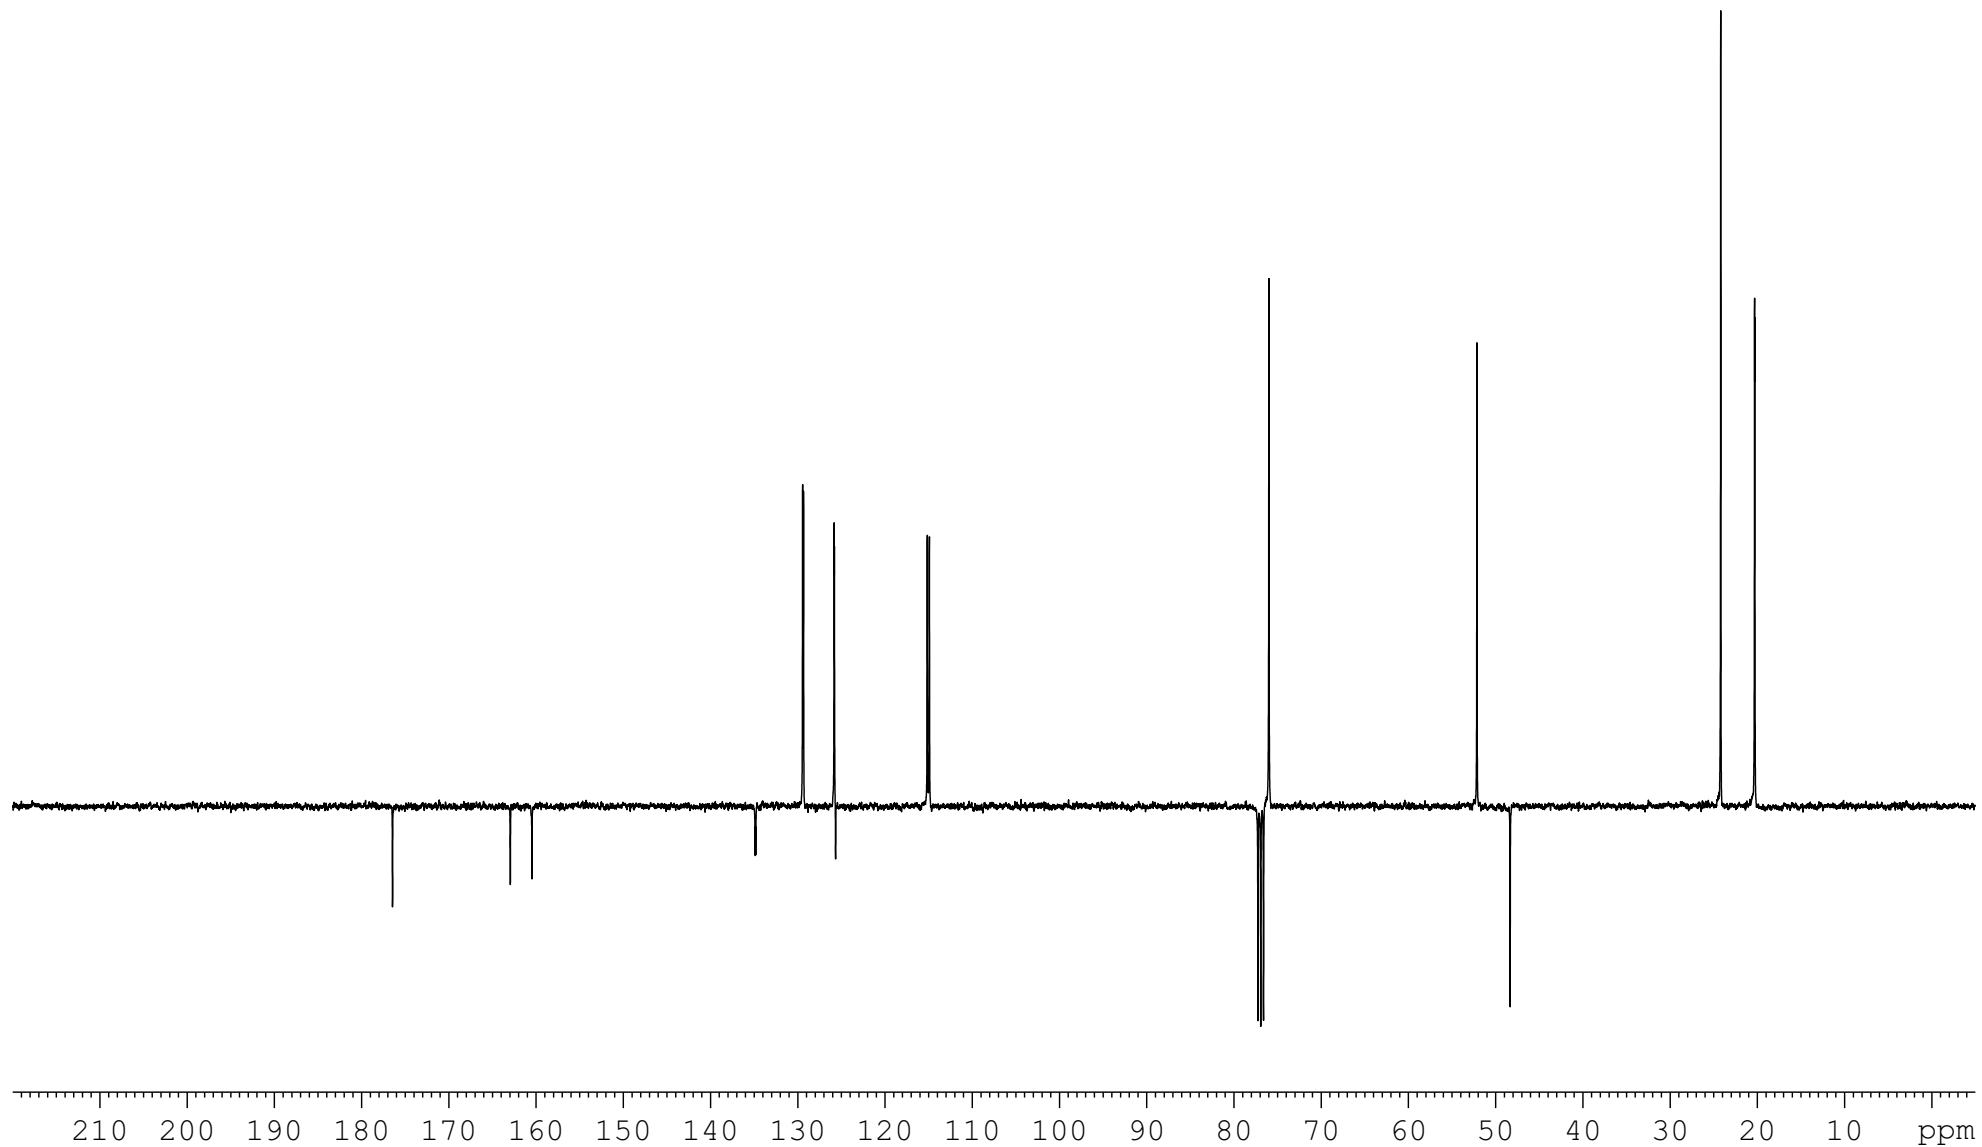

Methyl 3-hydroxy-2,2-dimethyl-3-(3'-nitrophenyl)propanoate (3k)

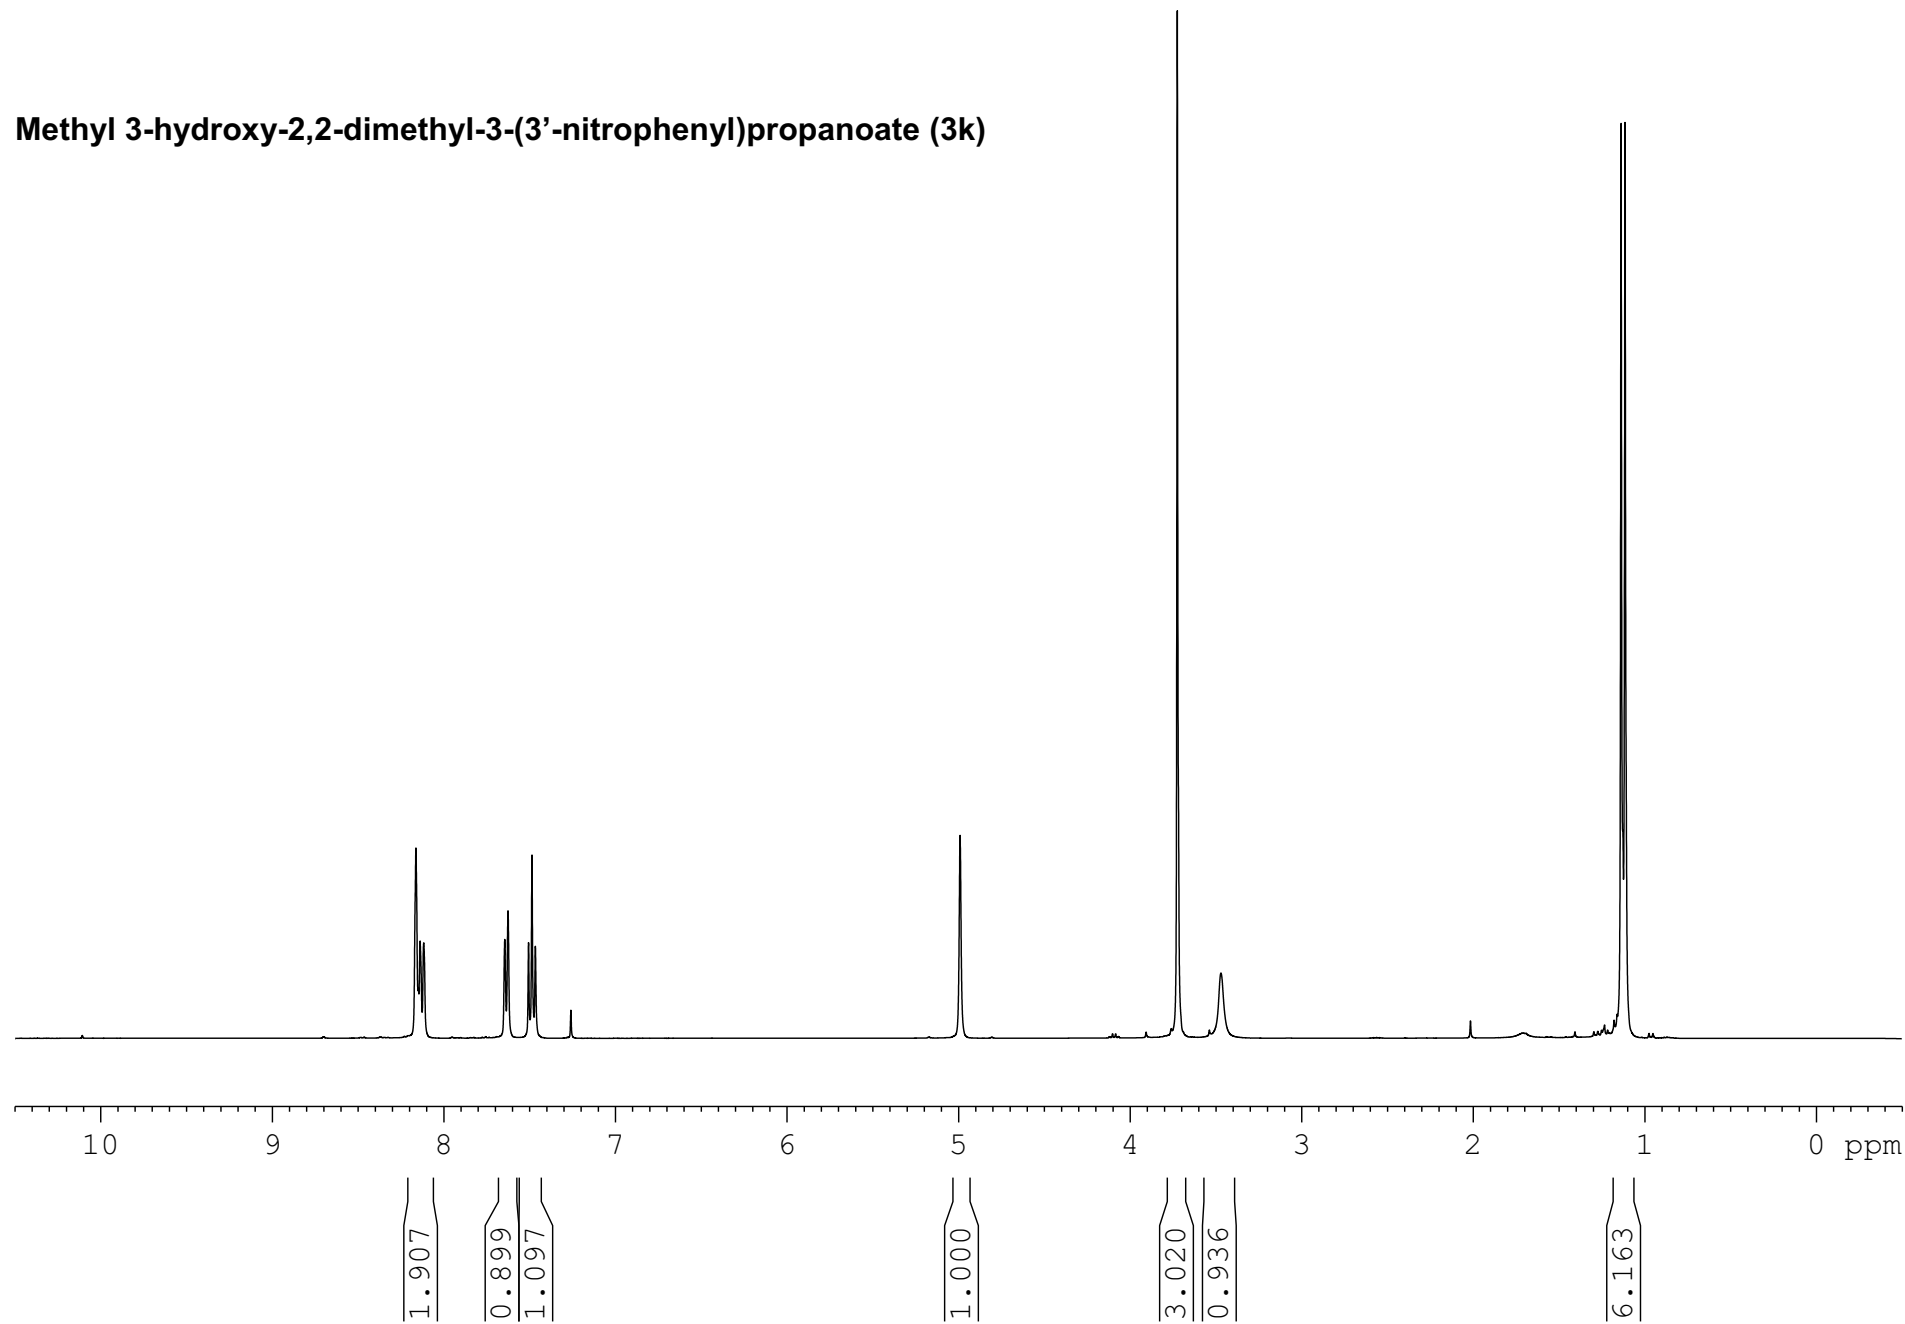



**Methyl 3-hydroxy-2,2-dimethyl-3-(3'-nitrophenyl)propanoate (3k)**

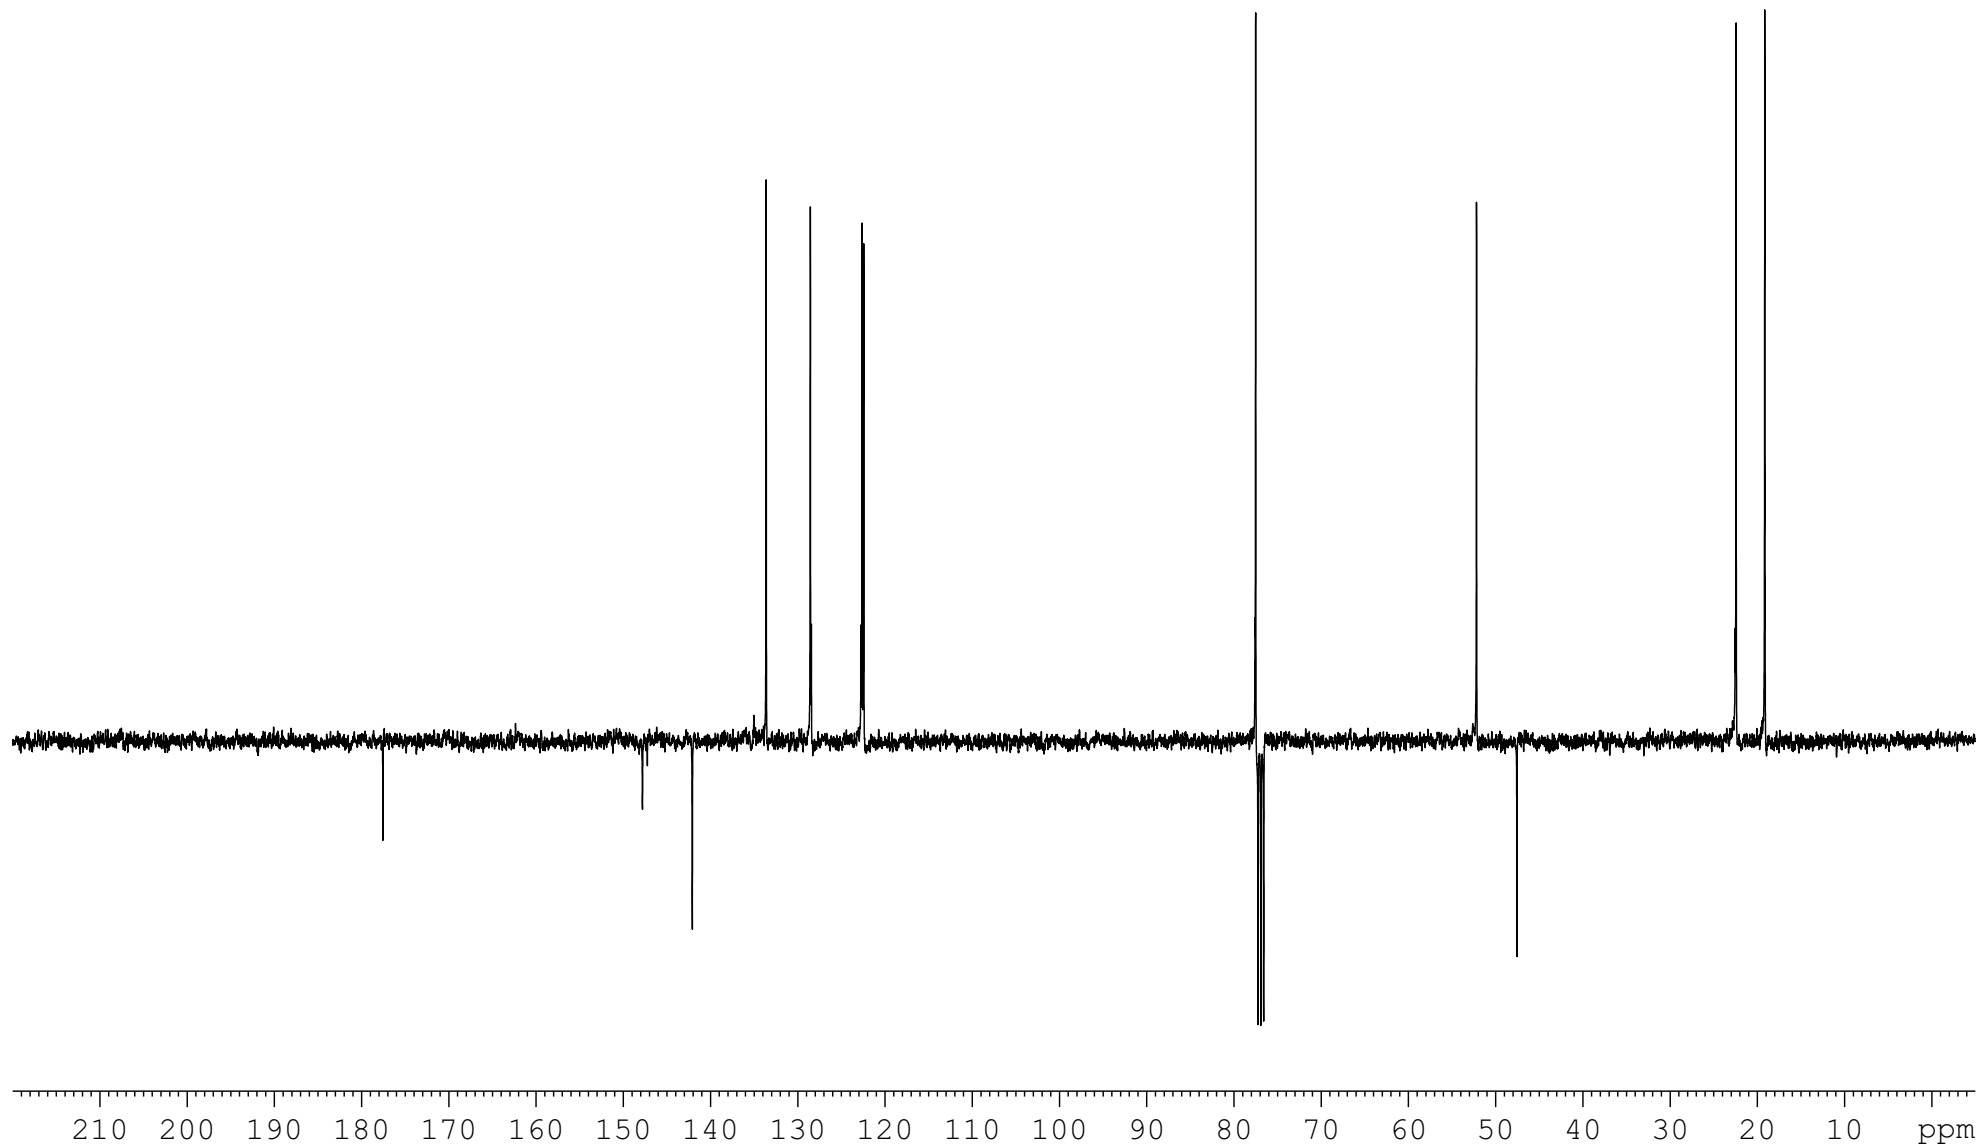

**Methyl 3-hydroxy-2,2-dimethyl-3'-pyridin-2-ylpropanoate (3I)**

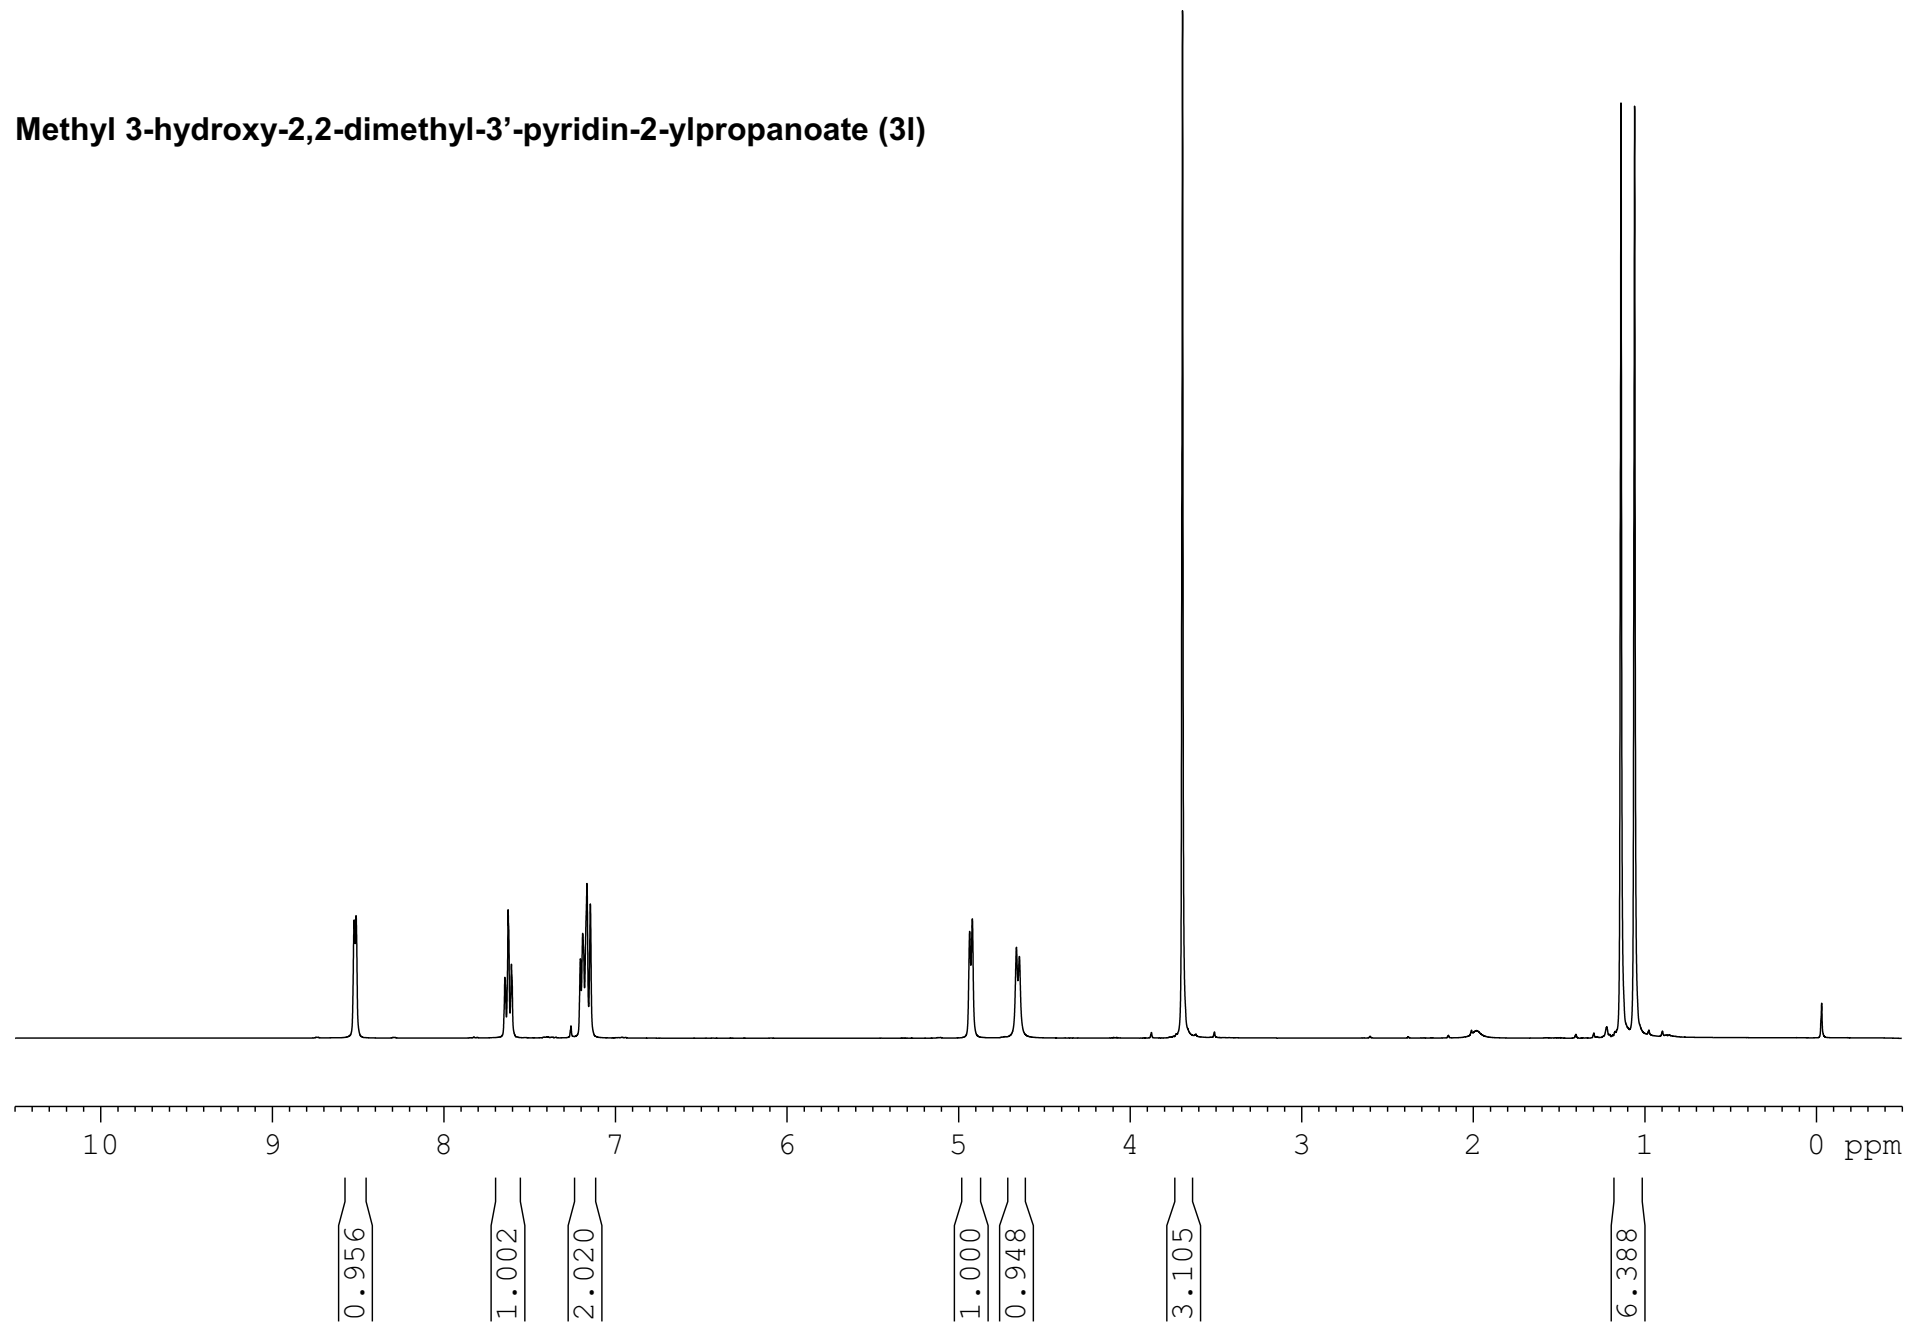

Methyl 3-hydroxy-2,2-dimethyl-3'-pyridin-2-ylpropanoate (3I)

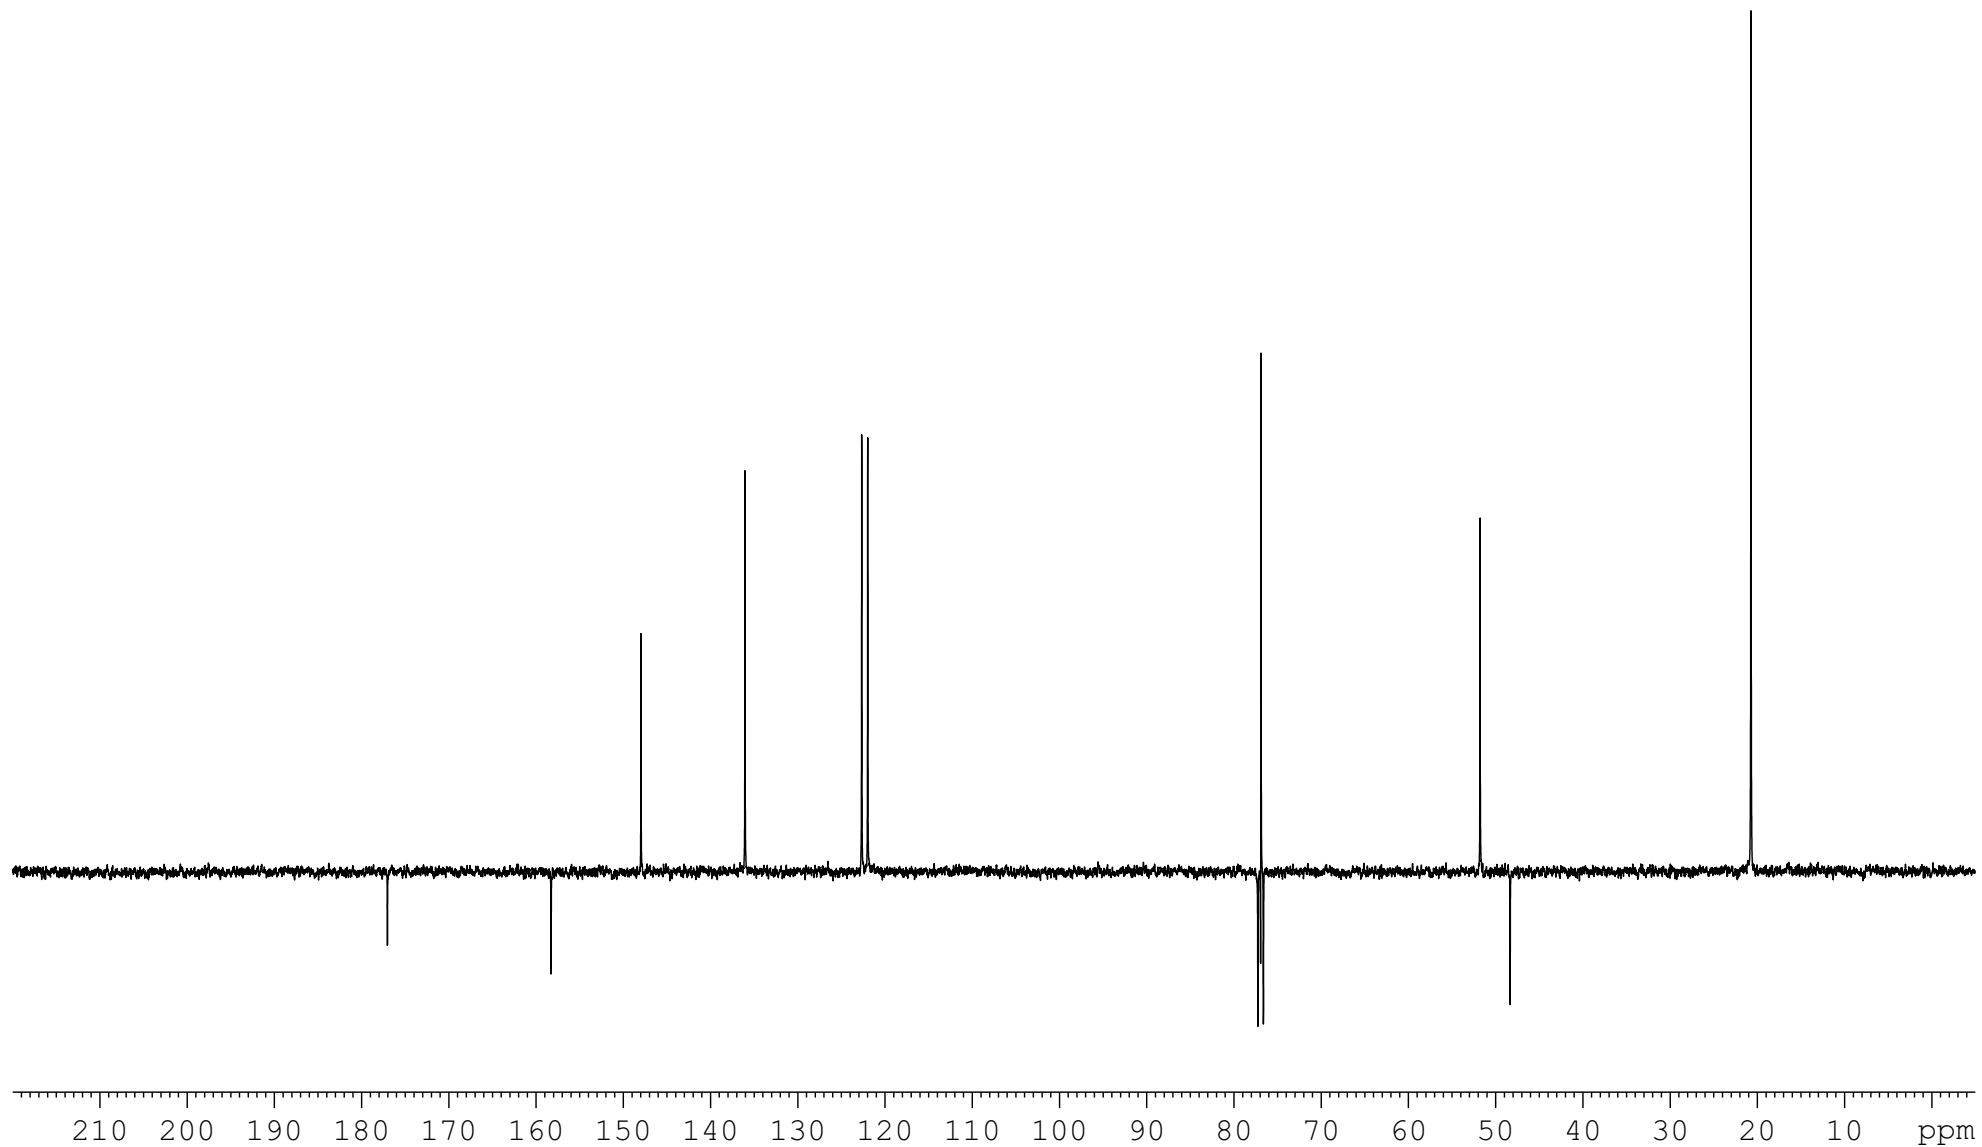

**Methyl 3-(4'-cyanophenyl)-3-{{(4'-cyanophenyl)[(trimethylsilyl)oxy]methoxy}-2,2-dimethylpropanoate (6h)**

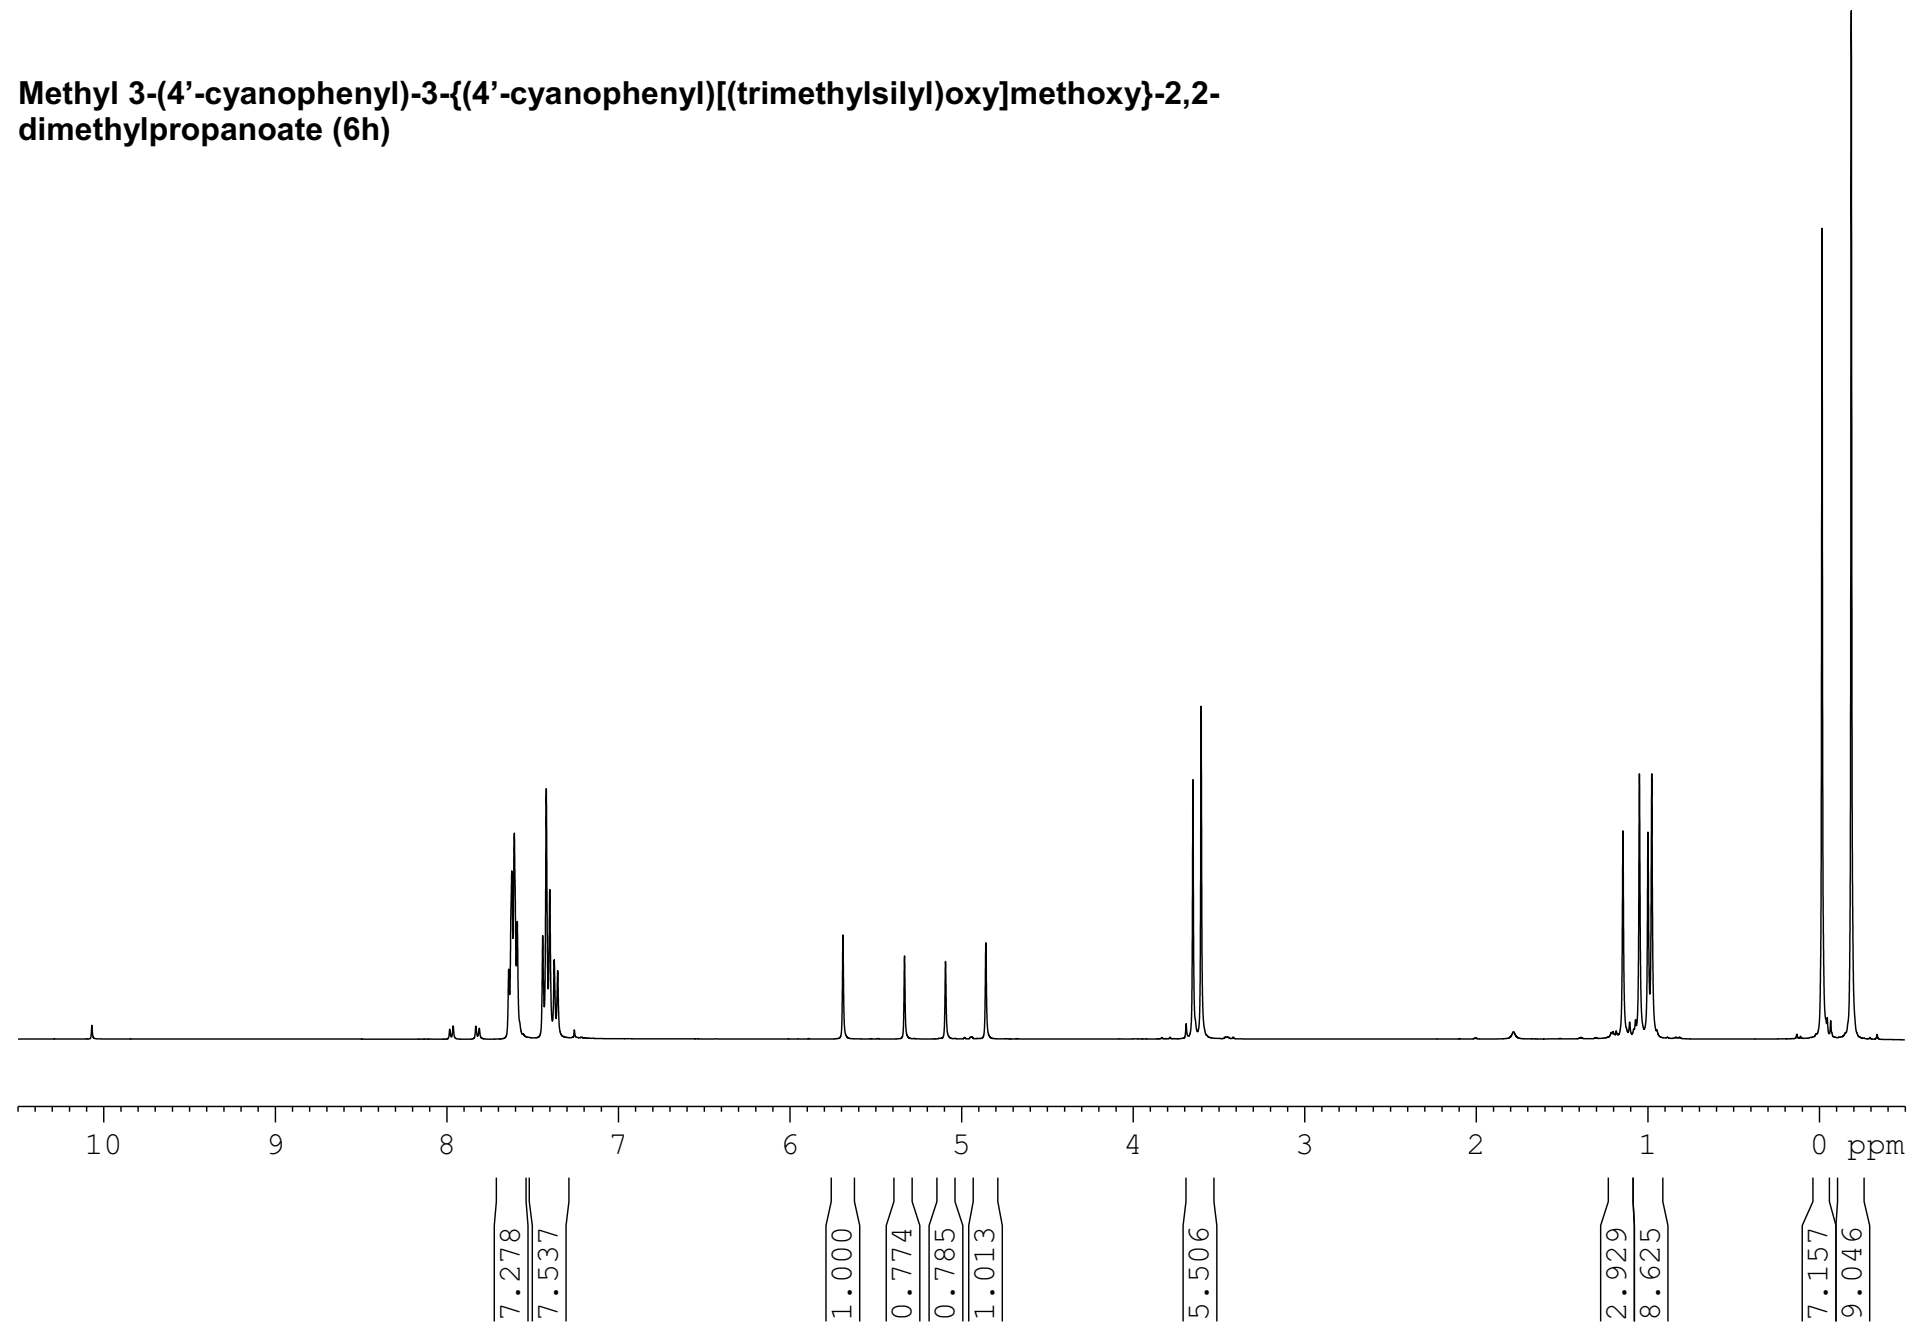

**Methyl 3-(4'-cyanophenyl)-3-((4'-cyanophenyl)[(trimethylsilyl)oxy]methoxy)-2,2-dimethylpropanoate (6h)**

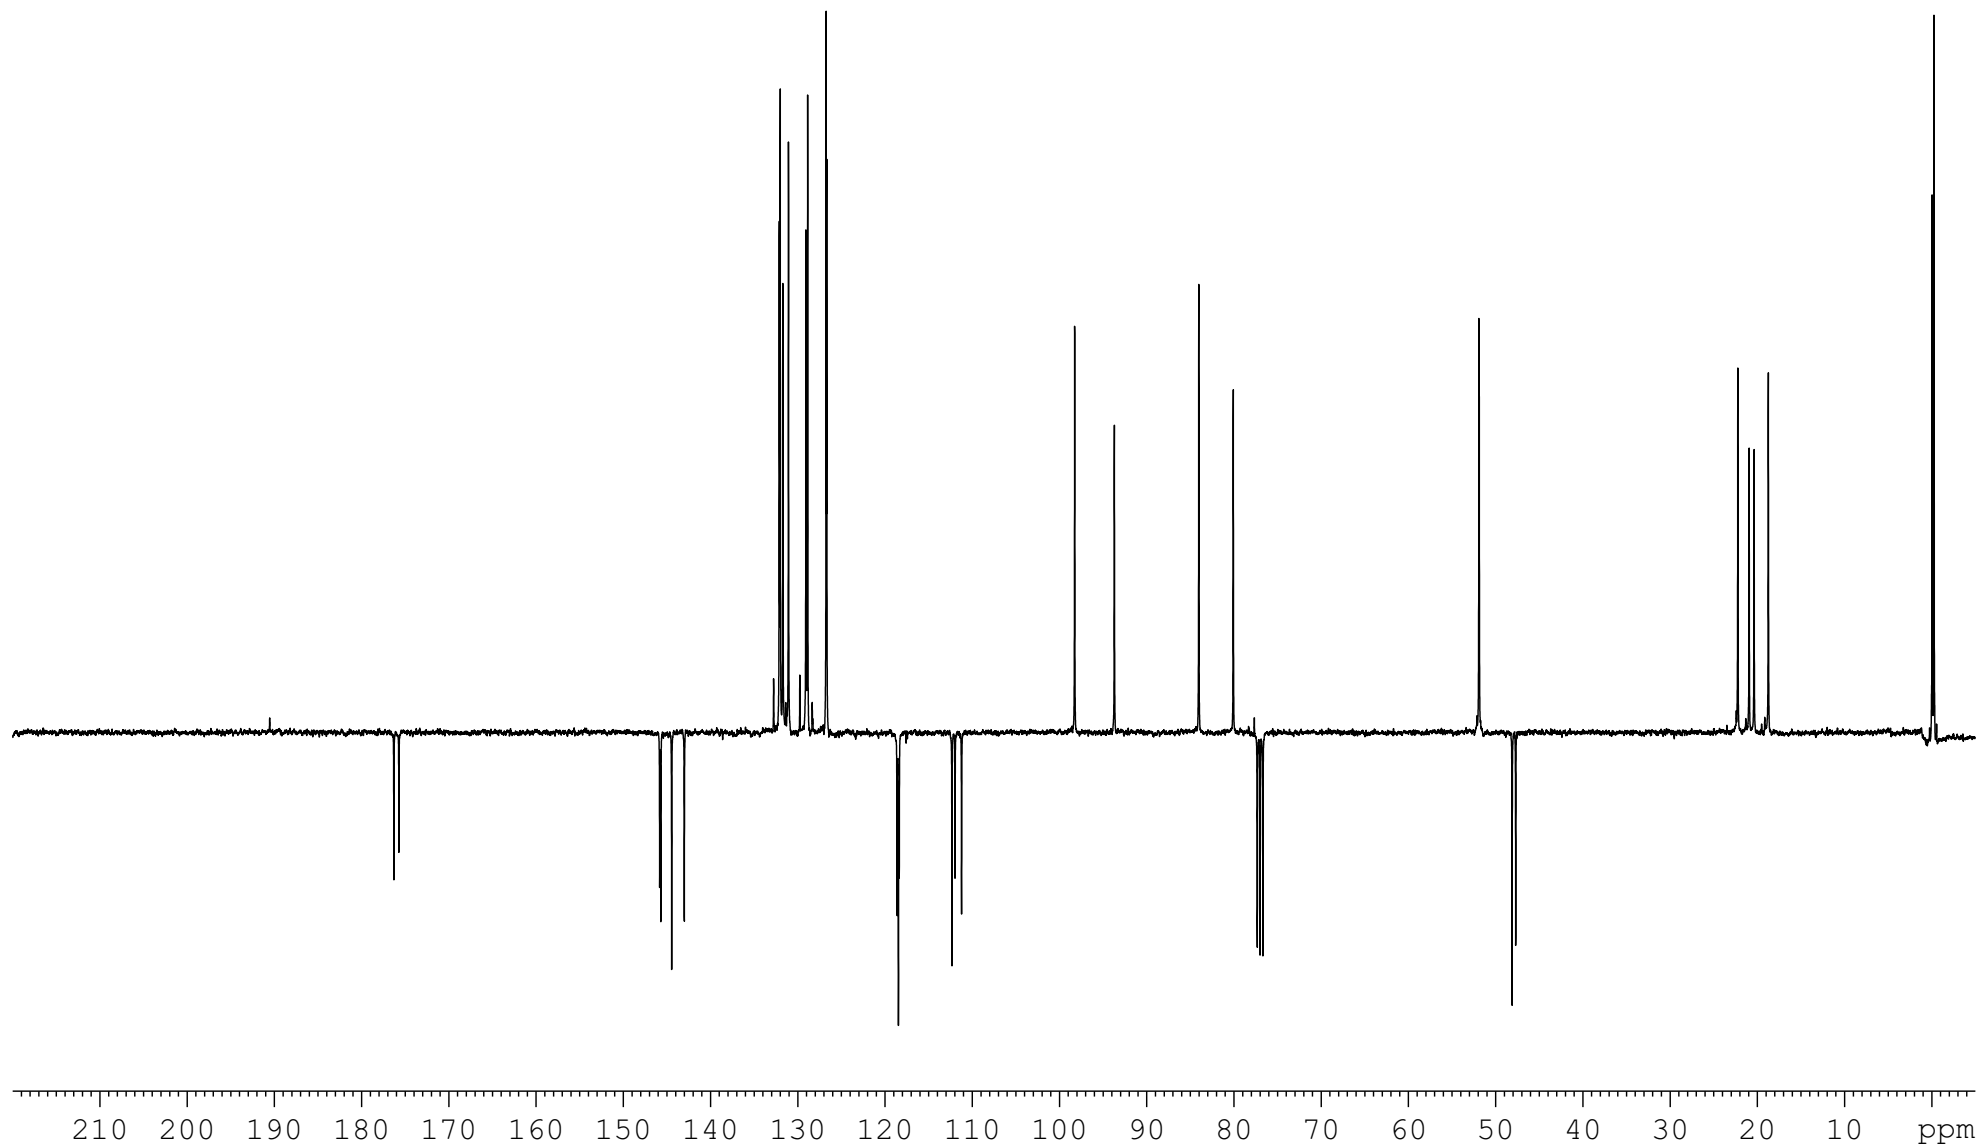

Supplement: c004461j.pdf [file c004461j.pdf]
